# Supplementary material for: Sonogashira cross-coupling reactions of 3,5-dibromo-2,6-dichloropyridine
Source: Royal Society of Chemistry journal article supplement (doi:10.1039/c6ob02264b), 2017-01-01

# Supporting Information

---

## **Sonogashira Cross-Coupling Reactions of 3,5-Dibromo-2,6-dichloropyridine**

Sebastian Reimann<sup>a,b</sup>, Peter Ehlers<sup>a,b</sup>, Lars Ohlendorf<sup>a</sup>, Peter Langer<sup>\*a,b</sup>

<sup>a</sup> Institut für Chemie, Universität Rostock, Albert-Einstein-Str. 3a, 18059 Rostock, Germany. E-mail:  
peter.langer@uni-rostock.de; Tel: +49 381 4986410; Fax: +49 381 4986412.

<sup>b</sup> Leibniz Institut für Katalyse an der Universität Rostock e.V., Albert-Einstein-Str. 29a, 18059 Rostock, Germany

## General procedure and analytical data for 4a-g

An oven-dried and argon-flushed pressure tube was charged with 3,5-dibromo-2,6-dichloropyridine **3** (0.33 mmol), Pd(dba)<sub>2</sub> (2.0 mol%) and HP(tBu)<sub>3</sub>BF<sub>4</sub> (2.0 mol%), followed by anhydrous THF (3.0 mL). The suspension was degassed by bubbling argon through the solution for 10 min. Afterwards, the appropriate alkyne (1.3 mmol) and Et<sub>3</sub>N (1.3 mmol) were added. The tube was sealed with a Teflon valve and the reaction mixture was stirred at room temperature for 20 h. The cooled reaction mixture was diluted with water and extracted with DCM. The combined organic layers were dried (Na<sub>2</sub>SO<sub>4</sub>), filtered and the filtrate was concentrated in vacuo. The residue was purified by column chromatography.

### 2,6-Dichloro-3,5-bis(phenylethynyl)pyridine (4a)

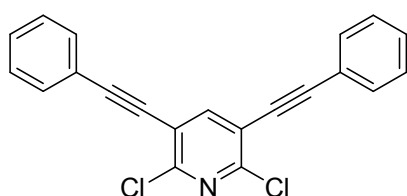

Starting with 3,5-dibromo-2,6-dichloropyridine **3** (100 mg, 0.327 mmol), Pd(dba)<sub>2</sub> (3.8 mg, 2.0 mol%), HP(tBu)<sub>3</sub>BF<sub>4</sub> (1.9 mg, 2.0 mol%), ethynylbenzene (0.075 mL, 0.687 mmol), Et<sub>3</sub>N (0.182 mL, 1.308 mmol) and THF (3.0 mL), **4a** was isolated as a colorless solid (58 mg, 66%); mp = 130-132 °C. <sup>1</sup>H NMR (300 MHz, CDCl<sub>3</sub>): δ = 7.35-7.40 (m, 6H, CH), 7.52-7.58 (m, 4H, CH), 7.96 (s, 1H, CH). <sup>13</sup>C NMR (75 MHz, CDCl<sub>3</sub>): δ = 82.7 (C<sub>alkyne</sub>), 98.8 (C<sub>alkyne</sub>), 119.2 (C), 121.8 (C), 128.5 (CH), 129.4 (CH), 131.8 (CH), 144.7 (CH), 149.5 (C). IR (ATR, cm<sup>-1</sup>):  $\tilde{\nu}$  = 3048 (w), 2215 (m), 1572 (w), 1487 (m), 1397 (w), 1386 (m), 1276 (w), 1229 (w), 1156 (m), 1106 (m), 1002 (w), 925 (m), 832 (w), 779 (m), 751 (s), 734 (w), 681 (s), 527 (m), 458 (m), 383 (w). GC-MS (EI, 70 eV): m/z (%): 348 (M<sup>+</sup>, 26), 347 (100), 311 (3), 278 (3), 277 (15), 275 (10), 251 (3), 249 (4), 248 (6), 224 (5), 207 (4), 175 (7), 173 (8), 160 (2), 150 (3), 125 (7), 124 (4), 112 (3), 99 (3), 75 (2), 44 (2), 43 (2). HRMS (EI, 70 eV): calcd. for C<sub>21</sub>H<sub>11</sub>Cl<sub>2</sub>N (M<sup>+</sup>): 347.02631, found 347.02588 and calcd. for C<sub>21</sub>H<sub>11</sub>Cl<sup>37</sup>ClN (M<sup>+</sup>): 349.02336, found 349.02364.

### 2,6-Dichloro-3,5-bis((4-tert-butylphenyl)ethynyl)pyridine (4b)

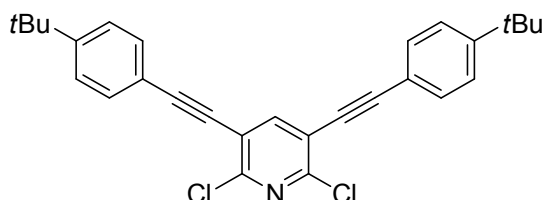

Starting with 3,5-dibromo-2,6-dichloropyridine **3** (100 mg, 0.327 mmol), Pd(dba)<sub>2</sub> (3.8 mg, 2.0 mol%), HP(tBu)<sub>3</sub>BF<sub>4</sub> (1.9 mg, 2.0 mol%), 1-tert-butyl-4-ethynylbenzene (0.123 mL, 0.687 mmol), Et<sub>3</sub>N (0.182 mL, 1.308 mmol) and THF (3.0 mL), **4b** was isolated as a yellow solid (87 mg, 58%); mp = 191-193 °C. <sup>1</sup>H NMR (400 MHz, CDCl<sub>3</sub>): δ = 1.32 (s, 18H, CH<sub>3</sub> tBu), 7.38-7.41 (s, 4H, CH), 7.48-7.51 (s, 4H, CH), 7.96 (s, 1H, CH). <sup>13</sup>C NMR (100 MHz, CDCl<sub>3</sub>): δ = 31.1 (CH<sub>3</sub> tBu), 34.9 (C<sub>tBu</sub>), 82.2 (C<sub>alkyne</sub>), 98.4 (C<sub>alkyne</sub>), 118.8 (C), 119.4 (C), 125.5 (CH), 131.6 (CH), 144.6 (CH), 149.2 (C), 152.9 (C). IR (ATR, cm<sup>-1</sup>):  $\tilde{\nu}$  = 2960 (m), 2867 (w), 2216 (w), 1909 (w), 1606 (w), 1503

(m), 1461 (w), 1396 (w), 1383 (m), 1268 (m), 1162 (m), 1100 (m), 905 (m), 831 (s), 733 (w), 622 (w), 562 (m), 490 (w), 471 (m). GC-MS (EI, 70 eV):  $m/z$  (%): 460 ( $M^+$ , 22), 459 (67), 449 (5), 448 (14), 447 (20), 446 (73), 445 (34), 444 (100), 418 (4), 416 (7), 405 (2), 402 (4), 400 (3), 388 (5), 362 (3), 360 (3), 341 (3), 314 (6), 301 (7), 289 (3), 215 (30), 201 (13), 187 (26), 151 (4), 57 (8), 41 (18). HRMS (EI, 70 eV): calcd. for  $C_{29}H_{27}Cl_2N$  ( $M^+$ ): 459.15151, found 459.15132 and calcd. for  $C_{29}H_{27}Cl^{37}ClN$  ( $M^+$ ): 461.14856, found 416.149000.

### 2,6-Dichloro-3,5-bis((4-methoxyphenyl)ethynyl)pyridine (**4c**)

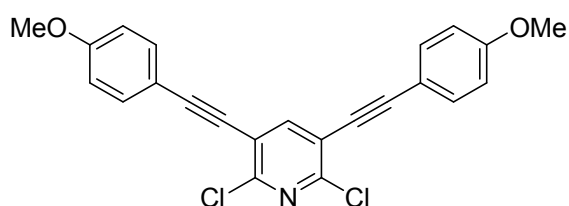

Starting with 3,5-dibromo-2,6-dichloropyridine **3** (100 mg, 0.327 mmol),  $Pd(dba)_2$  (3.8 mg, 2.0 mol%),  $HP(tBu)_3BF_4$  (1.9 mg, 2.0 mol%), 1-ethynyl-4-methoxybenzene (0.089 mL, 0.687 mmol),  $Et_3N$  (0.182 mL, 1.308 mmol) and THF (3.0 mL), **4c** was isolated as a colorless solid (95 mg, 71%); mp = 150-152 °C.  $^1H$  NMR (400 MHz,  $CDCl_3$ ):  $\delta$  = 3.82 (s, 6H, MeO), 6.89-6.90 (m, 4H, CH), 7.46-7.50 (m, 4H, CH), 7.89 (s, 1H, CH).  $^{13}C$  NMR (100 MHz,  $CDCl_3$ ):  $\delta$  = 55.3 (MeO), 81.8 ( $C_{alkyne}$ ), 98.3 ( $C_{alkyne}$ ), 113.9 (C), 114.2 (CH), 119.5 (C), 133.4 (CH), 144.2 (CH), 148.7 (C), 160.5 (C). IR (ATR,  $cm^{-1}$ ):  $\tilde{\nu}$  = 3048 (w), 2936 (w), 2836 (w), 2209 (s), 1604 (m), 1566 (m), 1506 (s), 1416 (m), 1394 (s), 1384 (m), 1299 (m), 1246 (s), 1184 (m), 1107 (m), 1030 (m), 991 (w), 913 (w), 825 (s), 742 (m), 666 (m), 530 (m), 495 (w), 473 (m), 407 (m). GC-MS (EI, 70 eV):  $m/z$  (%): 408 ( $M^+$ , 26), 407 (100), 394 (14), 392 (20), 364 (5), 349 (4), 323 (3), 321 (5), 251 (11), 249 (3), 225 (3), 224 (3), 204 (5), 203 (10), 198 (2), 183 (4), 182 (6), 160 (6), 136 (2), 125 (4), 112 (3), 99 (3), 39 (3). HRMS (EI, 70 eV): calcd. for  $C_{23}H_{15}Cl_2NO_2$  ( $M^+$ ): 407.04744, found 407.04728 and calcd. for  $C_{23}H_{15}Cl^{37}ClNO_2$  ( $M^+$ ): 409.04449, found 409.04479.

### 2,6-Dichloro-3,5-bis((4-*n*-hexylphenyl)ethynyl)pyridine (**4d**)

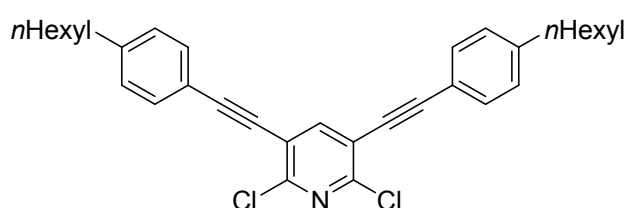

Starting with 3,5-dibromo-2,6-dichloropyridine **3** (100 mg, 0.327 mmol),  $Pd(dba)_2$  (3.8 mg, 2.0 mol%),  $HP(tBu)_3BF_4$  (1.9 mg, 2.0 mol%), 1-ethynyl-4-*n*-hexylbenzene (0.144 mL, 0.687 mmol),  $Et_3N$  (0.182 mL, 1.308 mmol) and THF (3.0 mL), **4d** was isolated as an orange solid (128 mg, 76%); mp = 57-59 °C.  $^1H$  NMR (400 MHz,  $CDCl_3$ ):  $\delta$  = 0.96 (t,  $^3J_{H-H}$  = 7.1 Hz, 6H, CH), 1.33-1.43 (m, 12H,  $CH_2$ ), 1.64-1.72 (m, 4H,  $CH_2$ ), 2.69 (brt,  $^3J_{H-H}$  = 7.5 Hz, 4H,  $CH_2$ ), 7.24-7.26 (m, 4H,  $CH_2$ ), 7.52-7.55 (m, 4H, CH), 8.01 (s, 1H, CH).  $^{13}C$  NMR (100 MHz,  $CDCl_3$ ):  $\delta$  = 14.0 ( $CH_3$ ), 22.5 ( $CH_2$ ), 28.9 ( $CH_2$ ), 31.1 ( $CH_2$ ), 31.6 ( $CH_2$ ), 35.9 ( $CH_2$ ), 82.2 ( $C_{alkyne}$ ), 98.4 ( $C_{alkyne}$ ), 118.9 (C), 119.4 (C), 128.6 (CH), 131.7 (CH), 144.4 (CH), 144.8 (C), 149.1 (C). IR (ATR,  $cm^{-1}$ ):  $\tilde{\nu}$  = 2956 (w), 2921 (m), 2852 (m), 2213 (m), 1911 (w), 1506 (m), 1467 (m), 1411 (m),

1394 (w), 1381 (m), 1279 (w), 1157 (m), 1108 (s), 989 (w), 909 (m), 841 (m), 825 (s), 724 (m), 672 (m), 647 (m), 634 (w), 580 (w), 541 (m), 533 (m), 419 (m). MS (EI, 70 eV):  $m/z$  (%): 517 ( $M^+$ , 64), 516 (32), 515 (100), 446 (29), 445 (13), 444 (46), 375 (11), 374 (12), 373 (14), 329 (3), 314 (2), 303 (2), 301 (4), 288 (2), 187 (2), 121 (3), 83 (2), 69 (5), 60 (3), 57 (3), 44 (5), 43 (10), 40 (2). HRMS (EI, 70 eV): calcd. for  $C_{33}H_{35}Cl_2N$  ( $M^+$ ): 515.21411, found 515.21315 and calcd. for  $C_{33}H_{35}Cl^{37}ClN$  ( $M^+$ ): 517.21116, found 517.21138. Anal. calcd. for  $C_{33}H_{35}Cl_2N$  (516.54): C, 76.73; H, 6.83; N, 2.71. Found: C, 76.69; H, 6.820; N, 2.690.

### 2,6-Dichloro-3,5-bis((4-fluorophenyl)ethynyl) pyridine (**4e**)

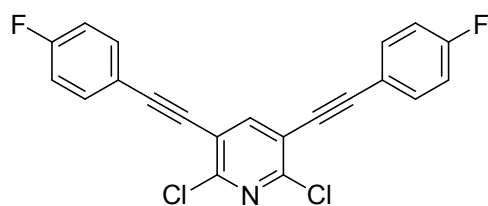

Starting with 3,5-dibromo-2,6-dichloropyridine **3** (100 mg, 0.327 mmol),  $Pd(dba)_2$  (3.8 mg, 2.0 mol%),  $HP(tBu)_3BF_4$  (1.9 mg, 2.0 mol%), 1-ethynyl-4-fluorobenzene (0.079 mL, 0.687 mmol),  $Et_3N$  (0.182 mL, 1.308 mmol) and THF (3.0 mL), **4e** was isolated as a orange solid (68 mg, 54%); mp = 168-170 °C.  $^1H$  NMR (400 MHz,  $CDCl_3$ ):  $\delta$  = 6.98-7.04 (m, 4H, CH), 7.45-7.50 (m, 4H, CH), 7.89 (s, 1H, CH).  $^{13}C$  NMR (100 MHz,  $CDCl_3$ ):  $\delta$  = 82.4 ( $C_{alkyne}$ ), 97.1 ( $C_{alkyne}$ ), 116.0 (d,  $^2J_{C-F}$  = 22.2 Hz, CH), 117.9 (d,  $^4J_{C-F}$  = 3.5 Hz, C), 119.1 (C), 133.8 (d,  $^3J_{C-F}$  = 9.0 Hz, CH), 144.6 (CH), 149.5 (C), 162.9 (d,  $^1J_{C-F}$  = 253.9 Hz, CF).  $^{19}F$  NMR (282.4 MHz,  $CDCl_3$ ):  $\delta$  = -108.1 (F). IR (ATR,  $cm^{-1}$ ):  $\tilde{\nu}$  = 3040 (w), 2216 (w), 1890 (w), 1599 (m), 1499 (m), 1384 (m), 1279 (w), 1219 (m), 1154 (m), 1108 (m), 1014 (w), 935 (m), 846 (m), 830 (s), 746 (m), 734 (m), 668 (w), 601 (w), 527 (m), 460 (w), 428 (m), 400 (w). MS (EI, 70 eV):  $m/z$  (%): 384 ( $M^+$ , 18), 383 (100), 314 (3), 313 (14), 312 (4), 311 (6), 286 (4), 192 (2), 169 (2), 147 (8), 144 (3), 143 (4), 57 (2), 43 (2), 36 (3). HRMS (EI, 70 eV): calcd. for  $C_{21}H_9Cl_2F_2N$  ( $M^+$ ): 383.00746, found 383.00728 and calcd. for  $C_{21}H_9Cl^{37}ClFN$  ( $M^+$ ): 385.00451, found 385.00463 and calcd. for  $C_{21}H_9^{37}Cl_2F_2N$  ( $M^+$ ): 387.00156, found 387.00217. Anal. calcd. for  $C_{21}H_9Cl_2F_2N$  (384.21): C, 65.65; H, 2.36; N, 3.65. Found: C, 65.38; H, 2.331; N, 3.648.

### 2,6-Dichloro-3,5-bis(*m*-tolylethynyl)pyridine (**4f**)

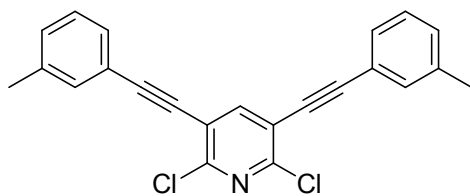

Starting with 3,5-dibromo-2,6-dichloropyridine **3** (100 mg, 0.327 mmol),  $Pd(dba)_2$  (3.8 mg, 2.0 mol%),  $HP(tBu)_3BF_4$  (1.9 mg, 2.0 mol%), 1-ethynyl-3-methylbenzene (0.088 mL, 0.687 mmol),  $Et_3N$  (0.182 mL, 1.308 mmol) and THF (3.0 mL), **4f** was isolated as a colorless solid (91 mg, 74%); mp = 104-106 °C.  $^1H$  NMR (400 MHz,  $CDCl_3$ ):  $\delta$  = 2.36 (s, 6H,  $CH_3$ ), 7.19-7.22 (m, 2H, CH), 7.24-7.28 (m, 2H, CH), 7.35-7.38 (m, 4H, CH), 7.94 (s, 1H, CH).  $^{13}C$  NMR (100 MHz,  $CDCl_3$ ):  $\delta$  = 21.2 ( $CH_3$ ), 82.4 ( $C_{alkyne}$ ), 98.4 ( $C_{alkyne}$ ), 119.3 (C), 121.7 (C), 128.4 (CH), 128.9 (CH), 130.4 (CH), 132.3 (CH), 138.3 (C), 144.7 (CH), 149.4 (C). IR (ATR,  $cm^{-1}$ ):  $\tilde{\nu}$  = 2913 (w), 2215 (m), 1599 (w), 1579 (m), 1513 (w), 1481 (m), 1393 (w), 1383 (m), 1277 (w), 1231 (w),

1199 (m), 1149 (m), 1108 (m), 1043 (w), 910 (m), 882 (m), 792 (m), 784 (s), 732 (m), 686 (s), 618 (w), 524 (w), 458 (m), 448 (m). GC-MS (EI, 70 eV):  $m/z$  (%): 376 ( $M^+$ , 25), 375 (100), 305 (2), 304 (5), 303 (4), 302 (6), 301 (6), 290 (2), 289 (4), 288 (9), 277 (3), 276 (4), 275 (2), 274 (2), 263 (2), 189 (3), 188 (3), 187 (2), 151 (6), 139 (5), 138 (3). HRMS (EI, 70 eV): calcd. for  $C_{23}H_{15}Cl_2N$  ( $M^+$ ): 375.05761, found 375.05751 and calcd. for  $C_{23}H_{15}Cl^{37}ClN$  ( $M^+$ ): 377.05466, found 377.05504. Anal. calcd. for  $C_{23}H_{15}Cl_2N$  (376.28): C, 73.42; H, 4.02; N, 3.72. Found: C, 73.64; H, 4.125; N, 3.814.

### 2,6-Dichloro-3,5-di(hex-1-ynyl)pyridine (**4g**)

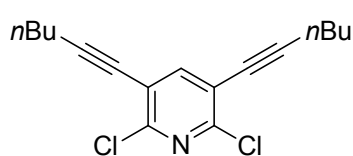

Starting with 3,5-dibromo-2,6-dichloropyridine **3** (100 mg, 0.327 mmol),  $Pd(dba)_2$  (3.8 mg, 2.0 mol%),  $HP(tBu)_3BF_4$  (1.9 mg, 2.0 mol%), *n*-hex-1-yne (0.077 mL, 0.687 mmol),  $Et_3N$  (0.182 mL, 1.308 mmol) and THF (3.0 mL), **4g** was isolated as a colorless oil (42 mg, 42%).  $^1H$  NMR (400 MHz,  $CDCl_3$ ):  $\delta$  = 0.92 (t,  $^3J_{H-H}$  = 7.3 Hz, 6H,  $CH_3$ ), 1.42-1.61 (m, 4H, CH), 2.44 (t,  $^3J_{H-H}$  = 7.3 Hz, 4H,  $CH_2$ ), 7.69 (s, 1H, C).  $^{13}C$  NMR (100 MHz,  $CDCl_3$ ):  $\delta$  = 13.6 ( $CH_3$ ), 19.4 ( $CH_2$ ), 22.0 ( $CH_2$ ), 30.3 ( $CH_2$ ), 74.5 ( $C_{alkyne}$ ), 100.1 ( $C_{alkyne}$ ), 119.7 (C), 145.3 (CH), 148.9 (C). IR (ATR,  $cm^{-1}$ ):  $\tilde{\nu}$  = 2958 (w), 2932 (w), 2871 (w), 2235 (m), 1714 (m), 1464 (w), 1382 (s), 1227 (m), 1119 (m), 1092 (m), 915 (m), 737 (m), 646 (m), 483 (w). GC-MS (EI, 70 eV):  $m/z$  (%): 308 ( $M^+$ , 21), 307 (100), 294 (25), 292 (41), 274 (14), 272 (46), 270 (11), 266 (34), 265 (10), 264 (43), 258 (14), 257 (10), 256 (37), 250 (6), 244 (20), 242 (9), 238 (10), 236 (24), 230 (16), 228 (14), 221 (14), 220 (14), 216 (16), 215 (11), 214 (20), 208 (17), 206 (11), 204 (11), 202 (20), 200 (27), 192 (19), 188 (20), 186 (16), 178 (19), 165 (23), 151 (43), 125 (13), 99 (13), 81 (17), 75 (15), 63 (13), 43 (30), 41 (55), 39 (18), 29 (13). HRMS (EI, 70 eV): calcd. for  $C_{17}H_{19}Cl_2N$  ( $M^+$ ): 307.08891, found 307.08884 and calcd. for  $C_{17}H_{19}Cl^{37}ClN$  ( $M^+$ ): 309.08596, found 309.08616.

## General procedure and analytical data for 5a-e

An oven-dried and argon-flushed pressure tube was charged with the appropriate 2,6-dichloro-3,5-dialkynyl-substituted pyridines **4** (0.2 mmol), PdCl<sub>2</sub>(CH<sub>3</sub>CN)<sub>2</sub> (5.0 mol%), XPhos (10.0 mol%) and CuI (5.0 mol%) followed by anhydrous 1,4-dioxane (2.6 mL). The suspension was degassed by bubbling argon through the solution for 10 min. Afterwards, the appropriate alkyne (0.74 mmol) and HN(*i*Pr)<sub>2</sub> (0.65 mL) were added. The tube was sealed with a Teflon valve and the reaction mixture was stirred at 80 °C for 20 h. The cooled reaction mixture was diluted with water and extracted with DCM. The combined organic layers were dried (Na<sub>2</sub>SO<sub>4</sub>), filtered and the filtrate was concentrated in vacuo. The residue was purified by column chromatography.

### 2,6-Bis((4-methoxyphenyl)ethynyl)-3,5-bis(phenylethynyl)pyridine (5a)

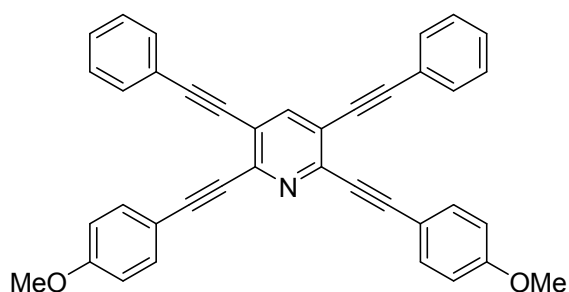

Starting with 2,6-dichloro-3,5-bis(phenylethynyl)pyridine **4a** (65 mg, 0.186 mmol), PdCl<sub>2</sub>(CH<sub>3</sub>CN)<sub>2</sub> (2.4 mg, 5.0 mol%), XPhos (8.9 mg, 10.0 mol%), 1-ethynyl-4-methoxy-benzene (0.096 mL, 0.744 mmol), CuI (1.8 mg, 5.0 mol%), HN(*i*Pr)<sub>2</sub> (0.65 mL, 4.625 mmol) and 1,4-dioxane

(2.6 mL), **5a** was isolated as a yellow solid (93 mg, 93%); mp = 206-208 °C. <sup>1</sup>H NMR (300 MHz, CDCl<sub>3</sub>): δ = 3.81 (s, 6H, MeO), 6.83-6.88 (m, 4H, CH), 7.34-7.39 (m, 6H, CH), 7.54-7.59 (m, 8H, CH), 7.93 (s, 1H, CH). <sup>13</sup>C NMR (75 MHz, CDCl<sub>3</sub>): δ = 55.3 (MeO), 85.6 (C<sub>alkyne</sub>), 86.9 (C<sub>alkyne</sub>), 95.6 (C<sub>alkyne</sub>), 97.2 (C<sub>alkyne</sub>), 114.1 (CH), 114.1 (C), 120.7 (C), 122.6 (C), 128.5 (CH), 129.0 (CH), 131.7 (CH), 133.5 (CH), 141.0 (CH), 143.9 (C), 160.5 (C). IR (ATR, cm<sup>-1</sup>): ν̃ = 3048 (w), 2928 (w), 2836 (w), 2541 (w), 2201 (m), 1601 (m), 1565 (m), 1508 (m), 1485 (m), 1441 (m), 1409 (m), 1295 (m), 1247 (s), 1170 (m), 1153 (m), 1135 (m), 1105 (m), 1069 (m), 1022 (m), 918 (m), 900 (m), 835 (s), 815 (m), 798 (m), 752 (s), 689 (s), 675 (m), 642 (w), 531 (s), 472 (w), 432 (w), 414 (w). MS (EI, 70 eV): m/z (%): 540 (M<sup>+</sup>, 39), 539 (100), 524 (4), 4453 (4), 452 (7), 451 (5), 450 (5), 449 (2), 270 (3), 226 (5), 225 (6), 207 (2), 66 (5), 65 (3), 57 (2), 44 (8), 39 (2). HRMS (ESI, 70 eV): calcd. for C<sub>39</sub>H<sub>26</sub>NO<sub>2</sub> ([M+H]<sup>+</sup>): 540.19581, found 540.19558.

### 2,6-Bis((4-(trifluoromethyl)phenyl)ethynyl)-3,5-bis(phenylethynyl)pyridine (5b)

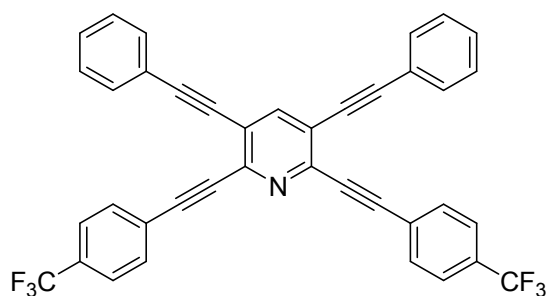

Starting with 2,6-dichloro-3,5-bis(phenylethynyl)pyridine **4a** (65 mg, 0.186 mmol), PdCl<sub>2</sub>(CH<sub>3</sub>CN)<sub>2</sub> (2.4 mg, 5.0 mol%), XPhos (8.9 mg, 10.0 mol%), 1-ethynyl-4-(trifluoromethyl)benzene (0.122 mL, 0.744 mmol), CuI (1.8 mg, 5.0 mol%), HN(*i*Pr)<sub>2</sub> (0.65 mL, 4.625 mmol) and 1,4-dioxane (2.6 mL), **5a**

was isolated as a yellow solid (104 mg, 91%); mp = 205-207 °C. <sup>1</sup>H NMR (300 MHz, CDCl<sub>3</sub>): δ = 7.34-7.41 (m, 6H, CH), 7.53-7.61 (m, 8H, CH), 7.69-7.71 (m, 4H, CH), 8.01 (s, 1H, CH). <sup>13</sup>C NMR (75 MHz, CDCl<sub>3</sub>): δ = 85.0 (C<sub>alkyne</sub>), 89.3 (C<sub>alkyne</sub>), 93.2 (C<sub>alkyne</sub>), 98.4 (C<sub>alkyne</sub>), 122.2 (C), 122.4 (C), 124.0 (q, <sup>1</sup>J<sub>C-F</sub> = 272.4 Hz, CF<sub>3</sub>), 125.4 (q, <sup>3</sup>J<sub>C-F</sub> = 3.9 Hz, CH), 125.8 (C), 128.7 (CH), 129.5 (CH), 131.0 (q, <sup>2</sup>J<sub>C-F</sub> = 33.2 Hz, C), 131.7 (CH), 132.4 (CH), 141.3 (CH), 143.0 (C). <sup>19</sup>F NMR (282.4 MHz, CDCl<sub>3</sub>): δ = -62.5 (CF<sub>3</sub>). IR (ATR, cm<sup>-1</sup>): ν̃ = 3055 (w), 2928 (w), 2204 (m), 1610 (m), 1515 (w), 1487 (s), 1319 (s), 1223 (w), 1161 (s), 1117 (s), 1103 (s), 1064 (s), 1014 (m), 913 (m), 837 (m), 755 (m), 735 (m), 687 (m), 594 (m), 549 (w), 526 (m), 390 (w). MS (EI, 70 eV): m/z (%): 616 (M<sup>+</sup>, 51), 615 (100), 614 (12), 546 (3), 544 (3), 294 (4), 145 (2), 114 (11), 101 (3), 99 (3), 91 (3), 86 (6), 85 (4), 83 (4), 81 (3), 73 (12), 71 (4), 70 (4), 66 (11), 65 (6), 64 (3), 60 (12), 56 (9), 55 (7), 44 (20), 43 (15), 42 (9), 41 (9), 40 (4), 39 (6). HRMS (EI, 70 eV): calcd. for C<sub>39</sub>H<sub>19</sub>F<sub>6</sub>N (M<sup>+</sup>): 615.14162, found 615.14346. Anal. calcd. for C<sub>39</sub>H<sub>19</sub>F<sub>6</sub>N (615.57): C, 76.10; H, 3.11; N, 2.28. Found: C, 76.06; H, 2.908; N, 2.071.

### 2,6-Bis(phenylethynyl)-3,5-bis(*m*-tolylethynyl)pyridine (5c).

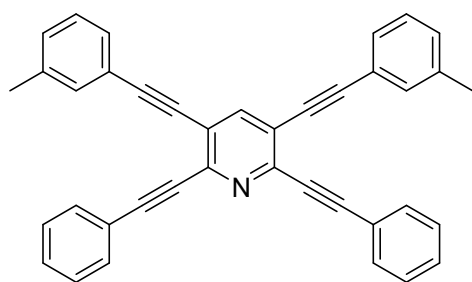

Starting with 2,6-dichloro-3,5-bis(*m*-tolylethynyl)-pyridine **4f** (70 mg, 0.186 mmol), PdCl<sub>2</sub>(CH<sub>3</sub>CN)<sub>2</sub> (2.4 mg, 5.0 mol%), XPhos (8.9 mg, 10.0 mol%), ethynylbenzene (0.065 mL, 0.744 mmol), CuI (1.8 mg, 5.0 mol%), HN(*i*Pr)<sub>2</sub> (0.65 mL, 4.625 mmol) and 1,4-dioxane (2.6 mL), **5c** was isolated as an orange solid (85 mg, 90%); mp = 136-138 °C. <sup>1</sup>H NMR (300 MHz, CDCl<sub>3</sub>): δ = 2.32 (s, 6H, CH<sub>3</sub>), 7.17-7.27 (m, 4H, CH), 7.32-7.41 (m, 10H, CH), 7.63-7.67 (m, 4H, CH), 7.94 (s, 1H, CH). <sup>13</sup>C NMR (75 MHz, CDCl<sub>3</sub>): δ = 21.1 (CH<sub>3</sub>), 85.2 (C<sub>alkyne</sub>), 87.7 (C<sub>alkyne</sub>), 95.0 (C<sub>alkyne</sub>), 98.0 (C<sub>alkyne</sub>), 121.6 (C), 122.1 (C), 122.2 (C), 128.4 (CH), 128.7 (CH), 129.3 (CH), 130.0 (CH), 132.2 (CH), 132.4 (CH), 138.2 (C), 140.8 (CH), 143.4 (C). IR (ATR, cm<sup>-1</sup>): ν̃ = 3035 (w), 2917 (w), 2856 (w), 2204 (m), 1596 (m), 1579 (w), 1489 (m), 1442 (m), 1414 (m), 1223 (m), 1153 (m), 1126 (w), 1024 (w), 997 (w), 912 (m), 874 (w), 782 (m), 767 (s), 754 (s), 685 (s), 620 (w), 553 (w), 531 (m), 487 (m), 466 (w), 444 (w). MS (EI, 70 eV): m/z (%): 508 (M<sup>+</sup>, 52), 507 (100), 506 (15), 505 (5), 492 (3), 491 (3), 490 (3), 240 (2), 239 (2), 238 (1), 237 (1). HRMS (ESI, 70 eV): calcd. for C<sub>39</sub>H<sub>26</sub>N ([M+H]<sup>+</sup>): 508.20598, found 508.20651.

## 2,6-Bis(*p*-tolylethynyl)-3,5-bis(*m*-tolylethynyl)pyridine (**5d**)

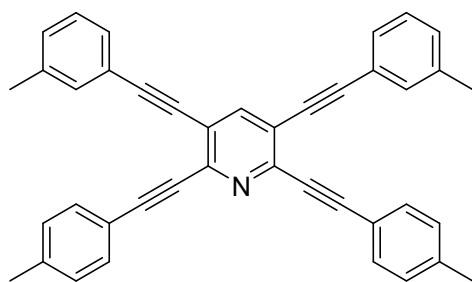

Starting with 2,6-dichloro-3,5-bis(*m*-tolylethynyl) pyridine **4f** (70 mg, 0.186 mmol), PdCl<sub>2</sub>(CH<sub>3</sub>CN)<sub>2</sub> (2.4 mg, 5.0 mol%), XPhos (8.9 mg, 10.0 mol%), 1-ethynyl-4-methylbenzene (0.121 mL, 0.744 mmol), CuI (1.8 mg, 5.0 mol%), HN(*i*Pr)<sub>2</sub> (0.65 mL, 4.625 mmol) and 1,4-dioxane (2.6 mL), **5d** was isolated as a yellow solid (87 mg, 87%); mp = 210-212 °C.

<sup>1</sup>H NMR (300 MHz, CDCl<sub>3</sub>): δ = 2.33 (s, 6H, CH<sub>3</sub>), 2.37 (s, 6H, CH<sub>3</sub>), 7.14-7.28 (m, 8H, CH), 7.36-7.41 (m, 4H, CH), 7.52-7.55 (m, 4H, CH), 7.93 (s, 1H, CH). <sup>13</sup>C NMR (75 MHz, CDCl<sub>3</sub>): δ = 21.2 (CH<sub>3</sub>), 21.6 (CH<sub>3</sub>), 85.3 (C<sub>alkyne</sub>), 87.3 (C<sub>alkyne</sub>), 95.4 (C<sub>alkyne</sub>), 97.7 (C<sub>alkyne</sub>), 119.1 (C), 121.3 (C), 122.3 (C), 128.4 (CH), 128.7 (CH), 129.2 (CH), 130.0 (CH), 132.1 (CH), 132.4 (CH), 138.2 (C), 139.7 (C), 140.8 (CH), 143.7 (C). IR (ATR, cm<sup>-1</sup>):  $\tilde{\nu}$  = 3031 (w), 2945 (m), 2915 (w), 2853 (w), 2210 (m), 1597 (w), 1574 (w), 1509 (m), 1481 (m), 1409 (m), 1277 (w), 1220 (w), 1192 (w), 1177 (w), 1150 (w), 1121 (w), 1041 (m), 1019 (w), 916 (m), 904 (m), 871 (w), 839 (w), 807 (m), 792 (s), 775 (s), 705 (w), 685 (s), 673 (w), 646 (w), 528 (s), 489 (m), 462 (w), 446 (s), 401 (w). MS (EI, 70 eV): m/z (%): 536 (M<sup>+</sup>,43), 535 (100), 534 (9), 533 (2), 520 (4), 518 (3), 503 (2), 428 (1), 268 (2), 260 (2), 254 (2), 252 (3), 44 (2). HRMS (ESI, 70 eV): calcd. for C<sub>41</sub>H<sub>30</sub>N ([M+H]<sup>+</sup>): 536.23748, found 536.23728.

## 2,6-Bis((4-(trifluoromethyl)phenyl)ethynyl)-3,5-bis(*m*-tolylethynyl)pyridine (**5e**)

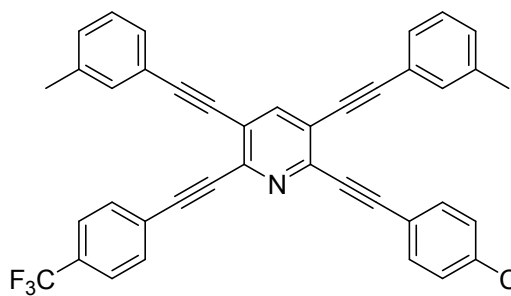

Starting with 2,6-dichloro-3,5-bis(*m*-tolylethynyl) pyridine **4f** (70 mg, 0.186 mmol), PdCl<sub>2</sub>(CH<sub>3</sub>CN)<sub>2</sub> (2.4 mg, 5.0 mol%), XPhos (8.9 mg, 10.0 mol%), 1-ethynyl-4-(trifluoromethyl)benzene (0.121 mL, 0.744 mmol), CuI (1.8 mg, 5.0 mol%), HN(*i*Pr)<sub>2</sub> (0.65 mL, 4.625 mmol) and 1,4-dioxane (2.6 mL), **5e** was isolated as a yellow solid (103 mg, 86%); mp = 178-180 °C. <sup>1</sup>H NMR (300 MHz, CDCl<sub>3</sub>): δ = 2.31 (s, 6H, CH<sub>3</sub>), 7.19-7.27 (m, 4H, CH), 7.32-7.35 (m, 4H, CH), 7.56-7.58 (m, 4H, CH), 7.68-7.71 (m, 4H, CH), 7.95 (s, 1H, CH). <sup>13</sup>C NMR (75 MHz, CDCl<sub>3</sub>): δ = 21.1 (CH<sub>3</sub>), 84.8 (C<sub>alkyne</sub>), 89.5 (C<sub>alkyne</sub>), 93.0 (C<sub>alkyne</sub>), 98.7 (C<sub>alkyne</sub>), 122.0 (C), 122.4 (C), 123.8 (q, <sup>1</sup>J<sub>C-F</sub> = 272.3 Hz, CF<sub>3</sub>), 125.3 (q, <sup>3</sup>J<sub>C-F</sub> = 3.8 Hz, CH), 125.8 (C), 128.5 (CH), 128.7 (CH), 130.3 (CH), 130.9 (q, <sup>2</sup>J<sub>C-F</sub> = 33.7 Hz, C), 132.3 (CH), 132.4 (CH), 138.3 (C), 141.0 (CH), 142.8 (C). <sup>19</sup>F NMR (282.4 MHz, CDCl<sub>3</sub>): δ = -62.5 (CF<sub>3</sub>). IR (ATR, cm<sup>-1</sup>):  $\tilde{\nu}$  = 3037 (w), 2921 (w), 2863 (w), 2204 (m), 1612 (m), 1516 (w), 1482 (m), 1405 (m), 1380 (w), 1320 (s), 1156 (m), 1117 (s), 1104 (m), 1065 (s), 1015 (m), 917 (w), 834 (m), 782 (m), 769 (m), 719 (m), 834 (m), 782 (m), 769 (m), 686 (m), 594 (m), 521 (w), 440 (w), 386 (w). MS (EI, 70 eV): m/z (%): 644 (M<sup>+</sup>,44), 643 (100), 642 (10), 641 (3), 628 (3), 624 (4), 558 (2), 308 (3), 307 (3), 279 (2), 244 (2), 237 (3), 139 (2), 44 (5). HRMS (ESI,



70 eV): calcd. for  $C_{41}H_{24}F_6N$  ( $[M+H]^+$ ): 644.18075, found 644.18053. Anal. calcd. for  $C_{41}H_{23}F_6N$  (643.62): C, 76.51; H, 3.60; N, 2.18. Found: C, 76.33; H, 3.466; N, 1.940.

### General procedure and analytical data for 6a-e

An oven-dried and argon-flushed pressure tube was charged with 3,5-dibromo-2,6-dichloropyridine **3** (0.33 mmol),  $Pd(dba)_2$  (3.0 mol%) and  $HP(tBu)_3BF_4$  (3.0 mol%), followed by anhydrous THF (3.0 mL). The suspension was degassed by bubbling argon through the solution for 10 min. Afterwards, the appropriate alkyne (1.3 mmol) and  $Et_3N$  (1.3 mmol) were added. The tube was sealed with a Teflon valve and stirred at room temperature for 20 h. The cooled reaction mixture was diluted with water and extracted with DCM. The combined organic layers were dried ( $Na_2SO_4$ ), filtered and the filtrate was concentrated in vacuo. The residue was purified by column chromatography.

#### 2-Chloro-3,5,6-tris(phenylethynyl)pyridine (6a)

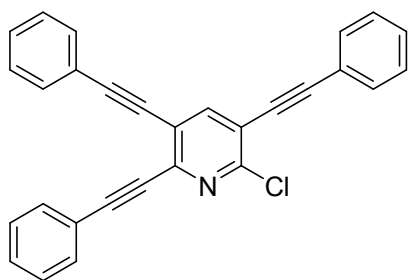

Starting with 3,5-dibromo-2,6-dichloropyridine **3** (100 mg, 0.327 mmol),  $Pd(dba)_2$  (5.6 mg, 3.0 mol%),  $HP(tBu)_3BF_4$  (2.9 mg, 3.0 mol%), ethynylbenzene (0.143 mL, 1.308 mmol),  $Et_3N$  (0.182 mL, 1.308 mmol) and THF (3.0 mL), **6a** was isolated as a yellow solid (79 mg, 58%); mp = 140-142 °C.  $^1H$  NMR (400 MHz,  $CDCl_3$ ):  $\delta$  = 7.32-7.39 (m, 9H, CH), 7.54-7.62 (m, 6H, CH), 7.96 (s,

1H, CH).  $^{13}C$  NMR (100 MHz,  $CDCl_3$ ):  $\delta$  = 83.8 ( $C_{alkyne}$ ), 84.3 ( $C_{alkyne}$ ), 87.1 ( $C_{alkyne}$ ), 96.2 ( $C_{alkyne}$ ), 97.2 ( $C_{alkyne}$ ), 98.5 ( $C_{alkyne}$ ), 119.2 (C), 121.6 (C), 121.8 (C), 122.0 (C), 122.2 (C), 128.5 (CH), 128.5 (CH), 128.5 (CH), 129.2 (CH), 129.4 (CH), 129.6 (CH), 131.7 (CH), 131.8 (CH), 132.2 (CH), 142.8 (C), 143.0 (CH), 150.5 (C). IR (ATR,  $cm^{-1}$ ):  $\tilde{\nu}$  = 3044 (w), 2212 (m), 1595 (w), 1507 (w), 1491 (m), 1417 (m), 1386 (m), 1333 (w), 1153 (m), 1122 (m), 1067 (w), 1012 (w), 909 (w), 858 (w), 750 (s), 681 (s), 594 (m), 528 (m), 431 (m). GC-MS (EI, 70 eV):  $m/z$  (%): 414 ( $M^+$ , 36), 413 (100), 412 (9), 377 (14), 376 (20), 375 (15), 373 (11), 350 (10), 338 (5), 281 (5), 250 (7), 249 (5), 224 (5), 207 (9), 189 (21), 188 (8), 175 (9), 174 (6), 161 (8), 156 (4), 150 (5), 136 (6), 133 (5), 117 (3), 112 (4), 100 (4), 87 (4), 76 (4), 75 (7), 39 (3). HRMS (EI, 70 eV): calcd. for  $C_{29}H_{16}ClN$  ( $M^+$ ): 413.09658, found 413.09657.

### 2-Chloro-3,5,6-tris((4-*n*-pentylphenyl)ethynyl)pyridine (**6b**)

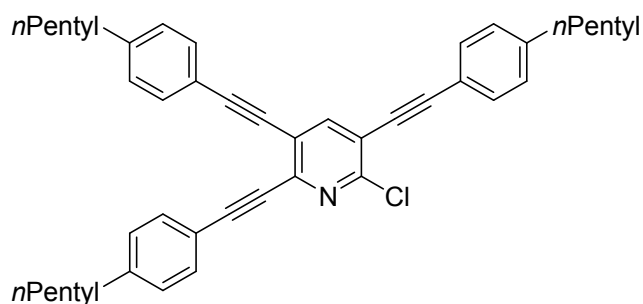

Starting with 3,5-dibromo-2,6-dichloropyridine **3** (100 mg, 0.327 mmol), Pd(dba)<sub>2</sub> (5.6 mg, 3.0 mol%), HP(tBu)<sub>3</sub>BF<sub>4</sub> (2.6 mg, 3.0 mol%), 1-ethynyl-4-*n*-pentylbenzene (0.254 mL, 1.308 mmol), Et<sub>3</sub>N (0.182 mL, 1.308 mmol) and THF (3.0 mL), **6b** was isolated as an orange solid (98 mg, 48%); mp = 86-88 °C. <sup>1</sup>H NMR (400 MHz, CDCl<sub>3</sub>): δ = 0.88 (t, <sup>3</sup>J<sub>H-H</sub> = 6.5 Hz, 3H, CH<sub>3</sub>), 0.89 (t, <sup>3</sup>J<sub>H-H</sub> = 6.9 Hz, 3H, CH<sub>3</sub>), 0.89 (t, <sup>3</sup>J<sub>H-H</sub> = 6.6 Hz, 3H, CH<sub>3</sub>), 1.28-1.36 (m, 12H, CH<sub>2</sub>), 1.57-1.64 (m, 12H, CH<sub>2</sub>), 2.59-2.64 (m, 6H, CH<sub>2</sub>), 7.15-7.19 (m, 6H, CH), 7.46-7.54 (m, 6H, CH), 7.91 (s, 1H, CH). <sup>13</sup>C NMR (100 MHz, CDCl<sub>3</sub>): δ = 13.9 (CH<sub>3</sub>), 13.9 (CH<sub>3</sub>), 13.9 (CH<sub>3</sub>), 22.4 (CH<sub>2</sub>), 22.4 (CH<sub>2</sub>), 22.4 (CH<sub>2</sub>), 30.8 (CH<sub>2</sub>), 30.8 (CH<sub>2</sub>), 30.8 (CH<sub>2</sub>), 31.4 (CH<sub>2</sub>), 31.4 (CH<sub>2</sub>), 31.4 (CH<sub>2</sub>), 35.9 (CH<sub>2</sub>), 35.9 (CH<sub>2</sub>), 83.4 (C<sub>alkyne</sub>), 83.9 (C<sub>alkyne</sub>), 86.9 (C<sub>alkyne</sub>), 96.6 (C<sub>alkyne</sub>), 97.4 (C<sub>alkyne</sub>), 98.8 (C<sub>alkyne</sub>), 119.0 (C), 119.2 (C), 119.2 (C), 119.4 (C), 121.6 (C), 128.5 (CH), 128.6 (CH), 128.6 (CH), 131.1 (CH), 131.7 (CH), 132.2 (CH), 142.7 (C), 142.8 (CH), 144.5 (C), 144.7 (C), 144.9 (C), 150.1 (C). IR (ATR, cm<sup>-1</sup>):  $\tilde{\nu}$  = 3031 (w), 2954 (m), 2925 (s), 2855 (m), 2215 (m), 1903 (w), 1688 (w), 1605 (w), 1509 (m), 1416 (m), 1387 (s), 1334 (m), 1223 (m), 1153 (m), 1122 (s), 1010 (w), 906 (m), 835 (m), 812 (s), 752 (m), 729 (m), 548 (s), 529 (s). MS (EI, 70 eV): m/z (%): 624 (M<sup>+</sup>, 46), 623 (100), 569 (2), 568 (6), 566 (12), 510 (14), 496 (1), 466 (2), 454 (4), 453 (7), 452 (2), 440 (1), 329 (3), 312 (2), 246 (7), 227 (3), 73 (14), 60 (19), 44 (31), 43 (7), 41 (4). HRMS (EI, 70 eV): calcd. for C<sub>44</sub>H<sub>46</sub>ClN (M<sup>+</sup>): 623.33133, found 623.33093 and calcd. for C<sub>44</sub>H<sub>46</sub><sup>37</sup>ClN (M<sup>+</sup>): 625.32838, found 625.33064.

### 2-Chloro-3,5,6-tris((4-methoxyphenyl)ethynyl)pyridine (**6c**)

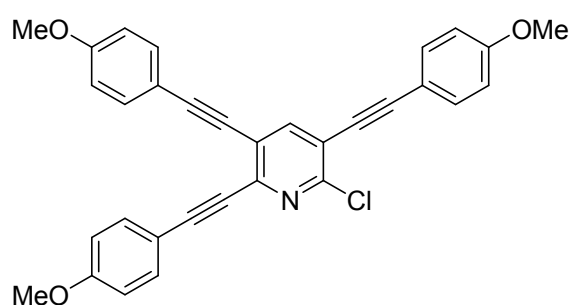

Starting with 3,5-dibromo-2,6-dichloropyridine **3** (100 mg, 0.327 mmol), Pd(dba)<sub>2</sub> (5.6 mg, 3.0 mol%), HP(tBu)<sub>3</sub>BF<sub>4</sub> (2.9 mg, 3.0 mol%), 1-ethynyl-4-methoxybenzene (0.169 mL, 1.308 mmol), Et<sub>3</sub>N (0.182 mL, 1.308 mmol) and THF (3.0 mL), **6c** was isolated as an orange solid (108 mg, 66%); mp = 148-150 °C. <sup>1</sup>H NMR (400 MHz, CDCl<sub>3</sub>): δ = 3.79 (s, 3H, MeO), 3.80 (s, 3H, MeO), 3.80 (s, 3H, MeO), 6.84-6.89 (m, 6H, CH), 7.46-7.55 (m, 6H, CH), 7.87 (s, 1H, CH). <sup>13</sup>C NMR (100 MHz, CDCl<sub>3</sub>): δ = 55.3 (MeO), 55.3 (MeO), 55.3 (MeO), 83.0 (C<sub>alkyne</sub>), 83.5 (C<sub>alkyne</sub>), 86.6 (C<sub>alkyne</sub>), 96.4 (C<sub>alkyne</sub>), 97.2 (C<sub>alkyne</sub>), 98.6 (C<sub>alkyne</sub>), 113.9 (C), 114.1 (C), 114.1 (C), 114.1 (CH), 114.2 (CH), 114.2 (CH), 114.4 (C), 119.1 (C), 121.5 (C), 133.2 (CH), 133.4 (CH), 133.8 (CH), 142.5 (CH), 149.8 (C), 160.3 (C), 160.4 (C), 160.6 (C). IR (ATR, cm<sup>-1</sup>):  $\tilde{\nu}$  = 2998 (w), 2932 (w), 2836 (w), 2196 (m), 1601 (m), 1562 (m), 1506 (s),

1385 (m), 1294 (m), 1245 (s), 1172 (m), 1149 (m), 1122 (m), 1106 (m), 1031 (m), 918 (w), 905 (w), 827 (s), 779 (m), 752 (m), 705 (m), 661 (w), 564 (m), 530 (m), 489 (m), 427 (w), 387 (w). MS (EI, 70 eV):  $m/z$  (%): 504 ( $M^+$ , 29), 503 (100), 490 (4), 489 (3), 488 (8), 473 (2), 460 (3), 445 (2), 338 (3), 329 (2), 252 (3), 230 (2), 187 (2), 176 (2), 169 (3), 44 (2). HRMS (EI, 70 eV): calcd. for  $C_{32}H_{22}ClNO_3$  ( $M^+$ ): 503.12827, found 503.12902.

### 2-Chloro-3,5,6-tris((4-fluorophenyl)ethynyl)pyridine (**6d**)

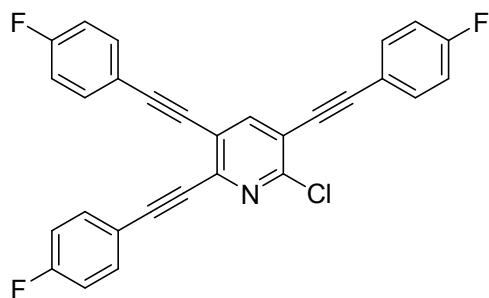

Starting with 3,5-dibromo-2,6-dichloropyridine **3** (100 mg, 0.327 mmol),  $Pd(dba)_2$  (5.6 mg, 3.0 mol%),  $HP(tBu)_3BF_4$  (2.9 mg, 3.0 mol%), ethynylbenzene (0.149 mL, 1.308 mmol),  $Et_3N$  (0.182 mL, 1.308 mmol) and THF (3.0 mL), **6d** was isolated as a yellow solid (78 mg, 51%); mp = 184-186 °C.  $^1H$  NMR (300 MHz,  $CDCl_3$ ):  $\delta$  = 7.01-7.10 (m, 6H, CH), 7.48-7.57 (m, 6H, CH), 7.91 (s, 1H, CH).  $^{13}C$  NMR (75 MHz,  $CDCl_3$ ):  $\delta$  = 83.5 ( $C_{alkyne}$ ), 84.0 ( $C_{alkyne}$ ), 86.8 ( $C_{alkyne}$ ), 95.1 ( $C_{alkyne}$ ), 96.1 ( $C_{alkyne}$ ), 97.6 ( $C_{alkyne}$ ), 115.9 (d,  $^2J_{C-F}$  = 22.0 Hz, CH), 116.09 (d,  $^2J_{C-F}$  = 22.4 Hz, CH), 116.1 (d,  $^2J_{C-F}$  = 22.4 Hz, CH), 117.8 (d,  $^4J_{C-F}$  = 3.8 Hz, C), 118.0 (d,  $^4J_{C-F}$  = 3.8 Hz, C), 118.3 (d,  $^4J_{C-F}$  = 3.8 Hz, C), 133.6 (d,  $^3J_{C-F}$  = 8.3 Hz, CH), 133.8 (d,  $^3J_{C-F}$  = 8.3 Hz, CH), 134.2 (d,  $^3J_{C-F}$  = 8.4 Hz, CH), 142.6 (C), 142.9 (CH), 150.5 (C), 163.0 (d,  $^1J_{C-F}$  = 251.4 Hz, CF), 163.3 (d,  $^1J_{C-F}$  = 251.2 Hz, CF), 163.5 (d,  $^1J_{C-F}$  = 251.2 Hz, CF).  $^{19}F$  NMR (282.4 MHz,  $CDCl_3$ ):  $\delta$  = -108.7 (F). IR (ATR,  $cm^{-1}$ ):  $\tilde{\nu}$  = 2219 (m), 1600 (m), 1566 (w), 1507 (s), 1419 (m), 1388 (m), 1337 (w), 1282 (w), 1228 (s), 1153 (m), 1126 (m), 1090 (m), 1011 (w), 915 (w), 828 (s), 797 (m), 753 (w), 712 (w), 608 (m), 528 (m), 455 (w), 405 (w), 387 (w). GC-MS (EI, 70 eV):  $m/z$  (%): 468 ( $M^+$ , 36), 467 (100), 466 (11), 431 (15), 430 (11), 429 (16), 411 (7), 404 (4), 286 (5), 234 (7), 233 (3), 215 (6), 192 (4), 178 (4), 144 (5), 143 (4). HRMS (EI, 70 eV): calcd. for  $C_{29}H_{13}ClF_3N$  ( $M^+$ ): 467.06831, found 467.06865. Anal. calcd. for  $C_{29}H_{13}ClF_3N$  (467.87): C, 74.45; H, 2.80; N, 2.99. Found: C, 74.45; H, 2.603; N, 2.683.

### 2-Chloro-3,5,6-tris(*m*-tolylethynyl)pyridine (**6e**)

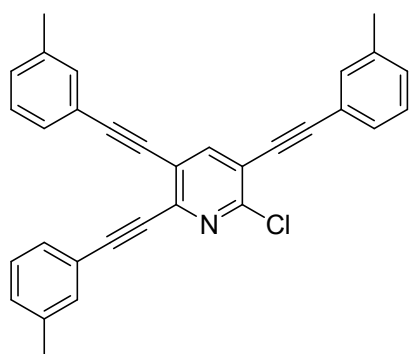

Starting with 3,5-dibromo-2,6-dichloropyridine **3** (100 mg, 0.327 mmol),  $Pd(dba)_2$  (5.6 mg, 3.0 mol%),  $HP(tBu)_3BF_4$  (2.9 mg, 3.0 mol%), 1-ethynyl-3-methylbenzene (0.169 mL, 1.308 mmol),  $Et_3N$  (0.182 mL, 1.308 mmol) and THF (3.0 mL), **6e** was isolated as an orange solid (83 mg, 56%); mp = 126-128 °C.  $^1H$  NMR (400 MHz,  $CDCl_3$ ):  $\delta$  = 2.31 (brs, 3H,  $CH_3$ ), 2.33 (brs, 3H,  $CH_3$ ), 2.36 (brs, 3H,  $CH_3$ ), 7.18-7.28 (m, 6H, CH), 7.36-7.45 (m, 6H, CH), 7.92 (s, 1H, CH).  $^{13}C$  NMR (100 MHz,  $CDCl_3$ ):  $\delta$  = 21.1 ( $CH_3$ ), 21.2 ( $CH_3$ ), 21.2 ( $CH_3$ ), 83.6 ( $C_{alkyne}$ ), 84.2

(C<sub>alkyne</sub>), 87.0 (C<sub>alkyne</sub>), 96.6 (C<sub>alkyne</sub>), 97.5 (C<sub>alkyne</sub>), 98.7 (C<sub>alkyne</sub>), 119.2 (C), 121.7 (C), 121.7 (C), 121.8 (C), 122.1 (C), 128.3 (CH), 128.4 (CH), 128.4 (CH), 128.6 (CH), 128.8 (CH), 128.9 (CH), 129.3 (CH), 130.1 (CH), 130.2 (CH), 130.5 (CH), 132.3 (CH), 132.9 (CH), 138.1 (C), 138.2 (C), 138.2 (C), 142.8 (C), 124.9 (CH), 150.3 (C). IR (ATR, cm<sup>-1</sup>):  $\tilde{\nu}$  = 2918 (w), 2211 (m), 1598 (w), 1578 (w), 1503 (m), 1402 (w), 1380 (m), 1337 (w), 1199 (m), 1118 (m), 1033 (m), 917 (m), 902 (m), 875 (m), 779 (s), 682 (s), 602 (w), 505 (w), 476 (m), 439 (m), 406 (w). MS (EI, 70 eV): m/z (%): 456 (M<sup>+</sup>, 41), 455 (100), 454 (11), 440 (5), 404 (5), 402 (4), 388 (4), 228 (2), 220 (2), 202 (3), 201 (5), 200 (2), 195 (2), 194 (2), 188 (2), 187 (2), 139 (1). HRMS (EI, 70 eV): calcd. for C<sub>32</sub>H<sub>22</sub>ClN (M<sup>+</sup>): 455.14353, found 455.14260 and calcd. for C<sub>32</sub>H<sub>22</sub><sup>37</sup>ClN (M<sup>+</sup>): 457.14058, found 457.14178.

### General procedure and analytical data for 7a-e

An oven-dried and argon-flushed pressure tube was charged with 3,5-dibromo-2,6-dichloropyridine **3** (0.33 mmol), PdCl<sub>2</sub>(CH<sub>3</sub>CN)<sub>2</sub> (3.0 mol%), tBuXPhos (6.0 mol%) and CuI (5.0 mol%) followed by anhydrous 1,4-dioxane (3.0 mL). The suspension was degassed by bubbling argon through the solution for 10 min. Afterwards, the appropriate alkyne (0.4 mmol) and HN(*i*Pr)<sub>2</sub> (1.3 mmol) were added. The tube was sealed with a Teflon valve and the reaction mixture was stirred at 80 °C for 20 h. The cooled reaction mixture was diluted with water and extracted with DCM. The combined organic layers were dried (Na<sub>2</sub>SO<sub>4</sub>), filtered and the filtrate was concentrated in vacuo. The residue was purified by column chromatography.

### 3-Bromo-2,6-dichloro-5-(phenylethynyl)pyridine (7a)

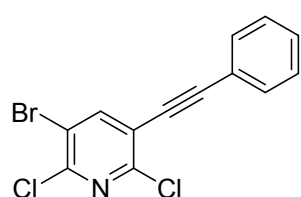

Starting with 3,5-dibromo-2,6-dichloropyridine **3** (100 mg, 0.327 mmol), PdCl<sub>2</sub>(CH<sub>3</sub>CN)<sub>2</sub> (2.5 mg, 3.0 mol%), tBuXPhos (8.3 mg, 6.0 mol%), CuI (3.1 mg, 5.0 mol%), ethynylbenzene (0.047 mL, 0.425 mmol), HN(*i*Pr)<sub>2</sub> (0.183 mL, 1.308 mmol) and 1,4-dioxane (3.0 mL), **7a** was isolated as a slightly yellow solid (53 mg, 50%); mp = 130-132 °C. <sup>1</sup>H NMR (400 MHz, CDCl<sub>3</sub>):  $\delta$  = 7.34-7.40 (m, 3H, CH), 7.53-7.56 (m, 2H, CH), 8.05 (s, 1H, CH). <sup>13</sup>C NMR (100 MHz, CDCl<sub>3</sub>):  $\delta$  = 82.2 (C<sub>alkyne</sub>), 98.8 (C<sub>alkyne</sub>), 118.1 (C), 120.7 (C), 121.5 (C), 128.6 (CH), 129.7 (CH), 131.8 (CH), 145.6 (CH), 148.3 (C), 149.6 (C). IR (ATR, cm<sup>-1</sup>):  $\tilde{\nu}$  = 3056 (w), 2217 (m), 1508 (w), 1488 (m), 1441 (w), 1393 (m), 1340 (m), 1270 (m), 1127 (m), 1156 (m), 1102 (s), 1084 (s), 907 (m), 833 (w), 784 (m), 752 (s), 686 (s), 673 (m), 683 (w), 589 (w), 529 (m), 512 (m), 439 (418 (w), 385 (w). GC-MS (EI, 70 eV): m/z (%): 327 (M<sup>+</sup>, 100), 326 (10), 325 (61), 213 (10), 212 (5), 211 (32), 210 (3), 176 (14), 175 (11), 160 (5), 150 (10), 149 (6), 135 (2), 133 (3), 123 (4), 111 (3), 110 (3), 98 (5), 92 (5), 77 (3), 75 (11), 74 (6), 51 (4), 50 (3). HRMS (EI, 70 eV): calcd. for C<sub>13</sub>H<sub>6</sub>BrCl<sub>2</sub>N (M<sup>+</sup>): 324.90552, found 324.90549 and

calcd. for  $C_{13}H_6^{81}BrCl_2N$  ( $M^+$ ): 326.90347, found 326.90308 and calcd. for  $C_{13}H_6^{81}BrCl^{37}ClN$  ( $M^+$ ): 328.90052, found 328.90066 and calcd. for  $C_{13}H_6^{81}Br^{37}Cl_2N$  ( $M^+$ ): 330.89757, found 330.89823. Anal. calcd. for  $C_{13}H_6BrCl_2N$  (327.00): C, 47.75; H, 1.85; N, 4.28. Found: C, 47.81; H, 1.874; N, 4.001.

### 3-Bromo-2,6-dichloro-5-((4-*n*-hexylphenyl)ethynyl)pyridine (**7b**)

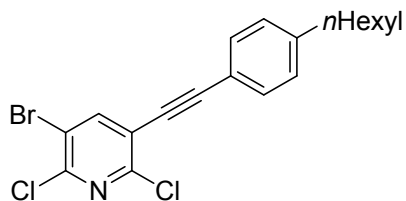

Starting with 3,5-dibromo-2,6-dichloropyridine **3** (100 mg, 0.327 mmol),  $PdCl_2(CH_3CN)_2$  (2.5 mg, 3.0 mol%), *t*BuXPhos (8.3 mg, 6.0 mol%), CuI (3.1 mg, 5.0 mol%), 1-ethynyl-4-*n*-hexylbenzene (0.088 mL, 0.425 mmol),  $HN(iPr)_2$  (0.183 mL, 1.308 mmol) and 1,4-dioxane (3.0 mL), **7b** was isolated as a slightly yellow solid (56 mg, 43%); mp = 50-52 °C.  $^1H$  NMR (400 MHz,  $CDCl_3$ ):  $\delta$  = 0.86 (t,  $^3J_{H-H}$  = 6.6 Hz, 3H,  $CH_3$ ), 1.23 -1.35 (m, 6H, CH), 1.56-1.63 (m, 2H, CH), 2.61 (t,  $^3J_{H-H}$  = 7.3 Hz, 2H,  $CH_2$ ), 7.16-7.18 (m, 2H, CH), 7.43-7.46 (m, 2H, CH), 8.02 (s, 1H, CH).  $^{13}C$  NMR (100 MHz,  $CDCl_3$ ):  $\delta$  = 14.1 ( $CH_3$ ), 22.6 ( $CH_2$ ), 28.9 ( $CH_2$ ), 31.2 ( $CH_2$ ), 31.7 ( $CH_2$ ), 36.1 ( $CH_2$ ), 81.2 ( $C_{alkyne}$ ), 99.4 ( $C_{alkyne}$ ), 118.1 (C), 118.7 (C), 121.0 (C), 128.7 (CH), 131.8 (CH), 145.2 (C), 145.5 (CH), 148.1 (C), 149.6 (C). IR (ATR,  $cm^{-1}$ ):  $\tilde{\nu}$  = 3050 (w), 2955 (w), 2922 (m), 2853 (m), 2209 (s), 1807 (w), 1604 (w), 1394 (s), 1341 (m), 1272 (w), 1224 (w), 1157 (s), 1117 (w), 1084 (s), 1018 (w), 820 (m), 723 (m), 668 (m), 625 (m), 588 (m), 551 (s), 511 (m), 440 (w), 423 (w). GC-MS (EI, 70 eV):  $m/z$  (%): 411 ( $M^+$ , 55), 410 (9), 409 (42), 353 (3), 342 (44), 341 (15), 340 (100), 339 (9), 338 (50), 332 (4), 268 (4), 224 (22), 188 (18), 175 (2), 173 (5), 102 (2), 41 (13), 32 (4). HRMS (ESI, 70 eV): calcd. for  $C_{19}H_{19}BrCl_2N$  ( $[M+H]^+$ ): 410.00724, found 410.00654. Anal. calcd. for  $C_{19}H_{18}BrCl_2N$  (411.16): C, 55.50; H, 4.41; N, 3.41. Found: C, 55.66; H, 4.217; N, 3.228.

### 3-Bromo-2,6-dichloro-5-((4-fluorophenyl)ethynyl)pyridine (**7c**)

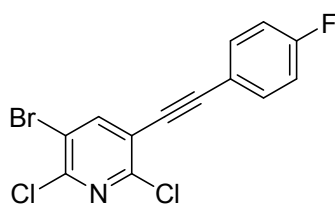

Starting with 3,5-dibromo-2,6-dichloropyridine **3** (100 mg, 0.327 mmol),  $PdCl_2(CH_3CN)_2$  (2.5 mg, 3.0 mol%), *t*BuXPhos (8.3 mg, 6.0 mol%), CuI (3.1 mg, 5.0 mol%), 1-ethynyl-4-fluoro-benzene (51 mg, 0.425 mmol),  $HN(iPr)_2$  (0.183 mL, 1.308 mmol) and 1,4-dioxane (3.0 mL), **7c** was isolated as a slightly yellow solid (52 mg, 46%); mp = 122-124 °C.  $^1H$  NMR (300 MHz,  $CDCl_3$ ):  $\delta$  = 7.04-7.10 (m, 2H, CH), 7.50-7.55 (m, 2H, CH), 8.03 (s, 1H, CH).  $^{13}C$  NMR (75 MHz,  $CDCl_3$ ):  $\delta$  = 82.0 ( $C_{alkyne}$ ), 97.7 ( $C_{alkyne}$ ), 116.0 (d,  $^2J_{C-F}$  = 23.4 Hz, CH), 117.7 (d,  $^4J_{C-F}$  = 3.4 Hz, C), 118.1 (C), 120.5 (C), 133.9 (d,  $^3J_{C-F}$  = 8.4 Hz, CH), 145.5 (CH), 148.4 (C), 149.6 (C), 163.3 (d,  $^1J_{C-F}$  = 255.4 Hz, CF).  $^{19}F$  NMR (282.4 MHz,  $CDCl_3$ ):  $\delta$  = -107.8 (F). IR (ATR,  $cm^{-1}$ ):  $\tilde{\nu}$  = 3046 (w), 2922 (w), 2215 (m), 1902 (w), 1656 (w), 1596 (m), 1504 (s), 1393 (m), 1340 (m), 1228 (m), 1154 (s), 1095 (w), 1083 (s), 1012 (w), 907 (m), 838 (s), 816 (w), 755 (m), 666 (m), 606 (w), 587 (m), 532 (m), 510 (w), 426 (m), 398 (w). GC-MS (EI, 70 eV):  $m/z$  (%): 345 ( $M^+$ , 100), 344 (13), 343 (54), 307 (3), 229 (32), 227 (4), 194 (12), 173 (5), 168

(15), 167 (5), 148 (4), 143 (4), 142 (4), 133 (3), 132 (3), 123 (5), 114 (2), 103 (4), 101 (9), 99 (7), 86 (4), 84 (5), 75 (3), 57 (2), 44 (4). HRMS (ESI, 70 eV): calcd. for C<sub>13</sub>H<sub>6</sub>BrCl<sub>2</sub>FN ([M+H]<sup>+</sup>): 343.90392, found 343.90372.

### 3-Bromo-2,6-dichloro-5-(*m*-tolylethynyl)pyridine (7d)

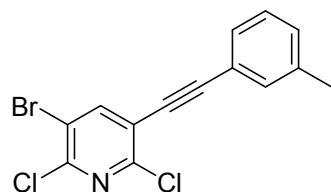

Starting with 3,5-dibromo-2,6-dichloropyridine **3** (100 mg, 0.327 mmol), PdCl<sub>2</sub>(CH<sub>3</sub>CN)<sub>2</sub> (2.5 mg, 3.0 mol%), *t*BuXPhos (8.3 mg, 6.0 mol%), CuI (3.1 mg, 5.0 mol%), 1-ethynyl-3-methyl-benzene (0.054 mL, 0.425 mmol), HN(*i*Pr)<sub>2</sub> (0.183 mL, 1.308 mmol) and 1,4-dioxane (3.0 mL), **7d** was isolated as a slightly yellow solid (68 mg, 61%); mp = 106-108 °C. <sup>1</sup>H NMR (400 MHz, CDCl<sub>3</sub>): δ = 2.35 (s, 3H, CH<sub>3</sub>), 7.19-7.28 (m, 2H, CH), 7.34-7.37 (m, 2H, CH), 8.03 (s, 1H, CH). <sup>13</sup>C NMR (100 MHz, CDCl<sub>3</sub>): δ = 21.2 (CH<sub>3</sub>), 81.9 (C<sub>alkyne</sub>), 99.1 (C<sub>alkyne</sub>), 118.0 (C), 120.7 (C), 121.3 (C), 128.4 (CH), 128.9 (CH), 130.6 (CH), 132.4 (CH), 138.3 (C), 145.5 (CH), 148.2 (C), 149.6 (C). IR (ATR, cm<sup>-1</sup>):  $\tilde{\nu}$  = 2918 (w), 2206 (m), 1971 (w), 1593 (w), 1484 (m), 1390 (m), 1338 (m), 1276 (w), 1228 (m), 1162 (m), 1145 (m), 1109 (w), 1084 (s), 1038 (w), 996 (w), 939 (w), 896 (m), 868 (m), 792 (s), 722 (m), 688 (m), 673 (w), 642 (w), 628 (m), 591 (m), 508 (w), 439 (m). GC-MS (EI, 70 eV): m/z (%): 341 (M<sup>+</sup>, 100), 340 (16), 339 (62), 338 (5), 306 (3), 226 (7), 225 (9), 224 (20), 199 (3), 190 (13), 189 (11), 188 (15), 174 (4), 171 (3), 164 (8), 163 (8), 139 (4), 115 (3), 112 (7), 110 (3), 99 (3), 94 (4), 81 (8), 74 (3), 63 (4), 39 (4). HRMS (ESI, 70 eV): calcd. for C<sub>14</sub>H<sub>9</sub>BrCl<sub>2</sub>N ([M+H]<sup>+</sup>): 339.92899, found 339.92872.

### 3-Bromo-2,6-dichloro-5-(pyridin-2-ylethynyl)pyridine (7e)

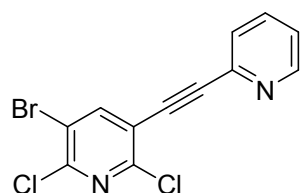

Starting with 3,5-dibromo-2,6-dichloropyridine **3** (100 mg, 0.327 mmol), PdCl<sub>2</sub>(CH<sub>3</sub>CN)<sub>2</sub> (2.5 mg, 3.0 mol%), *t*BuXPhos (8.3 mg, 6.0 mol%), CuI (3.1 mg, 5.0 mol%), 2-ethynylpyridine (0.048 mL, 0.425 mmol), HN(*i*Pr)<sub>2</sub> (0.183 mL, 1.308 mmol) and 1,4-dioxane (3.0 mL), **7e** was isolated as a slightly yellow solid (44 mg, 41%); mp = 130-132 °C. <sup>1</sup>H NMR (400 MHz, CDCl<sub>3</sub>): δ = 7.31 (ddd, <sup>3</sup>J<sub>H-H</sub> = 7.8 Hz, <sup>4</sup>J<sub>H-H</sub> = 4.3 Hz, <sup>5</sup>J<sub>H-H</sub> = 1.3 Hz, 1H, CH), 7.56-7.58 (m 1H, CH), 7.72 (ddd, <sup>3</sup>J<sub>H-H</sub> = 8.2 Hz, <sup>3</sup>J<sub>H-H</sub> = 7.8 Hz, <sup>4</sup>J<sub>H-H</sub> = 1.7 Hz, 1H, CH), 8.11 (s, 1H, CH), 8.64 (ddd, <sup>3</sup>J<sub>H-H</sub> = 5.1 Hz, <sup>4</sup>J<sub>H-H</sub> = 1.9 Hz, <sup>5</sup>J<sub>H-H</sub> = 0.9 Hz, 1H, CH). <sup>13</sup>C NMR (100 MHz, CDCl<sub>3</sub>): δ = 81.5 (C<sub>alkyne</sub>), 97.1 (C<sub>alkyne</sub>), 118.2 (C), 119.7 (C), 123.9 (CH), 127.8 (CH), 136.4 (CH), 141.9 (C), 146.2 (CH), 149.3 (C), 150.0 (C), 150.3 (CH). IR (ATR, cm<sup>-1</sup>):  $\tilde{\nu}$  = 2920 (w), 1580 (m), 1562 (m), 1504 (w), 1462 (s), 1391 (s), 1340 (m), 1287 (m), 1227 (m), 1152 (m), 1094 (s), 1043 (w), 991 (m), 903 (m), 887 (w), 805 (w), 795 (s), 772 (s), 735 (m), 678 (m), 631 (m), 528 (m), 504 (w), 438 (m), 400 (w). GC-MS (EI, 70 eV): m/z (%): 328 (M<sup>+</sup>, 100), 327 (9), 326 (61), 294 (3), 293 (26), 291 (20), 249 (11), 247 (17), 212 (12), 186 (9), 185 (6), 178 (2), 177 (16), 151 (4), 150 (4), 124 (5), 123

(5), 112 (2), 111 (3), 110 (3), 108 (2), 99 (6), 98 (6), 86 (3), 85 (3), 78 (6), 74 (4), 62 (4), 51 (7), 50 (3). HRMS (ESI, 70 eV): calcd. for  $C_{12}H_6BrCl_2N_2$  ( $[M+H]^+$ ): 326.90859, found 326.90864.

### General procedure and analytical data for 8a-g

An oven-dried and argon-flushed pressure tube was charged with 3,5-dibromo-2,6-dichloropyridine **3** (0.33 mmol),  $PdCl_2(CH_3CN)_2$  (5.0 mol%), XPhos (10.0 mol%) and CuI (5 mol%), followed by anhydrous 1,4-dioxane (4.0 mL). The suspension was degassed by bubbling argon through the solution for 10 min. Afterwards, the appropriate alkyne (1.3 mmol) and  $HN(iPr)_2$  (1.0 mL) were added. The tube was sealed with a Teflon valve and the reaction mixture was stirred at 80 °C for 20 h. The cooled reaction mixture was diluted with water and extracted with DCM. The combined organic layers were dried ( $Na_2SO_4$ ), filtered and the filtrate was concentrated in vacuo. The residue was purified by column chromatography.

#### 2,3,5,6-Tetrakis(phenylethynyl)pyridine (**8a**)

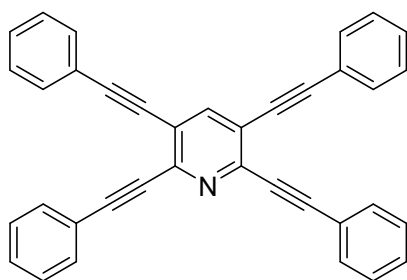

Starting with 3,5-dibromo-2,6-dichloropyridine **3** (100 mg, 0.327 mmol),  $PdCl_2(CH_3CN)_2$  (4.2 mg, 5.0 mol%), XPhos (15.6 mg, 10.0 mol%), ethynylbenzene (0.337 mL, 2.616 mmol), CuI (3.1 mg, 5.0 mol%),  $HN(iPr)_2$  (1.0 mL, 7.115 mmol) and 1,4-dioxane (4.0 mL), **8a** was isolated as a yellow solid (151 mg, 96%); mp = 169-171 °C.  $^1H$  NMR (400 MHz,  $CDCl_3$ ):  $\delta$  = 7.30-7.41 (m, 12H, CH), 7.55-7.66 (m, 8H, CH), 7.97 (s, 1H, CH).  $^{13}C$  NMR (100 MHz,  $CDCl_3$ ):  $\delta$  = 85.4 ( $C_{alkyne}$ ), 87.6 ( $C_{alkyne}$ ), 95.0 ( $C_{alkyne}$ ), 97.6 ( $C_{alkyne}$ ), 121.4 (C), 122.1 (C), 122.4 (c), 128.4 (CH), 128.5 (CH), 129.1 (CH), 129.3 (CH), 131.7 (CH), 132.1 (CH), 141.6 (CH), 143.5 (C). IR (ATR,  $cm^{-1}$ ):  $\tilde{\nu}$  = 3077 (w), 2955 (w), 2922 (w), 2850 (w), 2203 (m), 1596 (m), 1568 (m), 1489 (m), 1440 (m), 1413 (m), 1291 (w), 1134 (w), 1066 (w), 1024 (w), 997 (w), 908 (m), 744 (s), 679 (s), 614 (w), 528 (s), 463 (w), 446 (w), 416 (w). MS (EI, 70 eV):  $m/z$  (%): 480 ( $M^+$ , 42), 479 (100), 478 (21), 477 (8), 476 (10), 475 (4), 450 (2), 401 (3), 239 (5), 238 (7), 237 (3), 224 (5), 200 (2), 175 (2), 129 (6), 101 (3), 97 (3), 85 (4), 84 (4), 83 (4), 73 (19), 71 (6), 60 (23), 57 (10), 56 (4), 55 (9), 44 (14), 43 (15), 41 (9), 40 (4). HRMS (EI, 70 eV): calcd. for  $C_{37}H_{21}N$  ( $M^+$ ): 479.16685, found 479.16645.

### 2,3,5,6-Tetrakis((4-*tert*-butylphenyl)ethynyl)pyridine (**8b**)

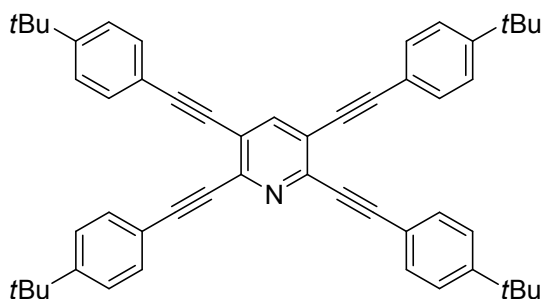

Starting with 3,5-dibromo-2,6-dichloropyridine **3** (100 mg, 0.327 mmol), PdCl<sub>2</sub>(CH<sub>3</sub>CN)<sub>2</sub> (4.2 mg, 5.0 mol%), XPhos (15.6 mg, 10.0 mol%), 1-*tert*-butyl-4-ethynylbenzene (0.535 mL, 2.616 mmol), CuI (3.1 mg, 5.0 mol%), HN(*i*Pr)<sub>2</sub> (1.0 mL, 7.115 mmol) and 1,4-dioxane (4.0 mL), **8b** was isolated as an orange solid (216 mg, 94%); mp = 125-127 °C. <sup>1</sup>H NMR (400 MHz, CDCl<sub>3</sub>): δ = 1.32 (s, 18H, CH<sub>3</sub> *t*Bu), 1.33 (s, 18H, CH<sub>3</sub> *t*Bu), 7.36-7.40 (m, 8H, CH), 7.50-7.59 (m, 8H, CH), 7.95 (s, 1H, CH). <sup>13</sup>C NMR (100 MHz, CDCl<sub>3</sub>): δ = 31.1 (CH<sub>3</sub> *t*Bu), 34.9 (C<sub>*t*Bu</sub>), 85.1 (C<sub>alkyne</sub>), 87.4 (C<sub>alkyne</sub>), 95.2 (C<sub>alkyne</sub>), 97.7 (C<sub>alkyne</sub>), 119.2 (C), 119.5 (C), 121.4 (C), 125.4 (CH), 125.5 (CH), 131.5 (CH), 132.0 (CH), 141.1 (CH), 143.5 (C), 152.5 (C), 152.7 (C). IR (ATR, cm<sup>-1</sup>):  $\tilde{\nu}$  = 2959 (s), 2903 (w), 2865 (w), 2204 (m), 1604 (w), 1504 (m), 1461 (m), 1416 (m), 1362 (m), 1262 (s), 1201 (w), 1161 (w), 1103 (s), 1016 (s), 911 (w), 830 (s), 799 (s), 770 (m), 736 (w), 697 (w), 559 (s), 392 (m). MS (EI, 70 eV): m/z (%): 704 (M<sup>+</sup>, 60), 703 (100), 688 (11), 632 (5), 600 (2), 560 (3), 352 (5), 337 (7), 207 (8), 145 (3), 123 (2), 116 (2), 115 (3), 114 (23), 98 (7), 97 (6), 86 (16), 85 (5), 84 (4), 83 (7), 73 (6), 66 (19), 65 (10), 57 (17), 56 (16), 55 (14), 45 (22), 44 (68), 43 (30), 42 (18), 41 (17), 39 (10). HRMS (ESI, 70 eV): calcd. for C<sub>53</sub>H<sub>54</sub>N ([M+H]<sup>+</sup>): 704.42508, found 704.42416.

### 2,3,5,6-Tetrakis((4-*n*-butylphenyl)ethynyl)pyridine (**8c**)

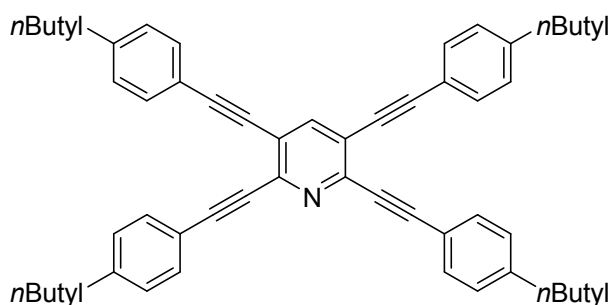

Starting with 3,5-dibromo-2,6-dichloro-pyridine **3** (100 mg, 0.327 mmol), PdCl<sub>2</sub>(CH<sub>3</sub>CN)<sub>2</sub> (4.2 mg, 5.0 mol%), XPhos (15.6 mg, 10.0 mol%), 1-*n*-butyl-4-ethynylbenzene (0.460 mL, 2.616 mmol), CuI (3.1 mg, 5.0 mol%), HN(*i*Pr)<sub>2</sub> (1.0 mL, 7.115 mmol) and 1,4-dioxane (4.0 mL), **8c** was isolated as a yellow solid (221 mg, 96%); mp = 116-118 °C. <sup>1</sup>H NMR (300 MHz, CDCl<sub>3</sub>): δ = 0.91 (t, <sup>3</sup>J<sub>H-H</sub> = 7.8 Hz, 6H, CH<sub>3</sub>), 0.921 (t, <sup>3</sup>J<sub>H-H</sub> = 7.5 Hz, 6H, CH<sub>3</sub>), 1.29-1.41 (m, 8H, CH<sub>2</sub>), 1.54-1.65 (m, 8H, CH<sub>2</sub>), 2.59-2.65 (m, 8H, CH<sub>2</sub>), 7.14-7.19 (m, 8H, CH), 7.47-7.56 (m, 8H, CH), 7.93 (s, 1H, CH). <sup>13</sup>C NMR (75 MHz, CDCl<sub>3</sub>): δ = 13.9 (CH<sub>3</sub>), 13.9 (CH<sub>3</sub>), 22.3 (CH<sub>2</sub>), 22.3 (CH<sub>2</sub>), 33.3 (CH<sub>2</sub>), 33.3 (CH<sub>2</sub>), 35.6 (CH<sub>2</sub>), 35.7 (CH<sub>2</sub>), 85.1 (C<sub>alkyne</sub>), 85.4 (C<sub>alkyne</sub>), 95.3 (C<sub>alkyne</sub>), 97.7 (C<sub>alkyne</sub>), 119.3 (C), 119.7 (C), 121.4 (C), 128.5 (CH), 128.6 (CH), 131.6 (CH), 132.6 (CH), 140.9 (CH), 143.4 (C), 144.3 (C), 144.6 (C). IR (ATR, cm<sup>-1</sup>):  $\tilde{\nu}$  = 3030 (w), 2954 (m), 2925 (s), 2856 (s), 2204 (m), 1686 (w), 1605 (m), 1509 (s), 1465 (w), 1412 (m), 1377 (w), 1156 (w), 1132 (w), 1070 (w), 912 (m), 821 (s), 770 (s), 728 (m), 668 (w), 595 (w), 541 (m), 455 (w). MS (EI, 70 eV): m/z (%): 704 (M<sup>+</sup>, 53), 703 (100), 660 (2), 618 (13), 546 (3), 352 (3), 281 (2), 267 (7), 207 (4), 105 (2), 97 (2), 91 (3), 83 (3), 77 (2), 73 (4), 69 (5), 60 (3), 57 (6), 55 (5), 45 (4), 44



(98), 43 (9), 41 (6), 36 (10). HRMS (ESI, 70 eV): calcd. for  $C_{53}H_{54}N$  ( $[M+H]^+$ ): 704.42508, found 704.42452 and calcd. for  $C_{53}H_{54}NNa$  ( $[M+Na]^+$ ): 726,40702, found 726.40633.

### 2,3,5,6-Tetrakis((4-methoxyphenyl)ethynyl)pyridine (**8d**)

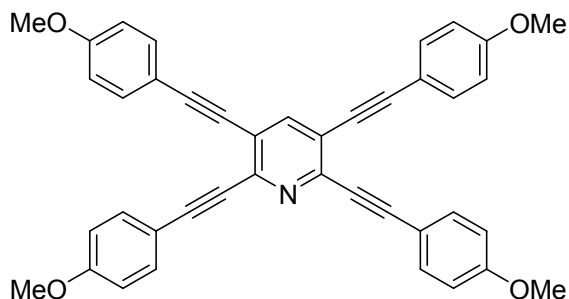

Starting with 3,5-dibromo-2,6-dichloropyridine **3** (100 mg, 0.327 mmol),  $PdCl_2(CH_3CN)_2$  (4.2 mg, 5.0 mol%), XPhos (15.6 mg, 10.0 mol%), 1-ethynyl-4-methoxybenzene (0.340 mL, 2.616 mmol), CuI (3.1 mg, 5.0 mol%),  $HN(iPr)_2$  (1.0 mL, 7.115 mmol) and 1,4-dioxane (4.0 mL), **8d** was isolated as a yellow solid (185 mg, 94%); mp = 211-213 °C.  $^1H$  NMR (400 MHz,  $CDCl_3$ ):  $\delta$  = 3.80 (s, 6H, MeO), 3.81 (s, 6H, MeO), 6.84-6.89 (m, 8H, CH), 7.47-7.51 (m, 8H, CH), 7.86 (s, 1H, CH).  $^{13}C$  NMR (100 MHz,  $CDCl_3$ ):  $\delta$  = 55.3 (MeO), 55.3 (MeO), 84.6 ( $C_{alkyne}$ ), 87.0 ( $C_{alkyne}$ ), 95.1 ( $C_{alkyne}$ ), 97.5 ( $C_{alkyne}$ ), 114.1 (CH), 114.1 (CH), 114.3 (C), 114.6 (C), 121.1 (C), 132.2 (CH), 133.8 (CH), 140.5 (CH), 143.2 (C), 160.2 (C), 160.4 (C). IR (ATR,  $cm^{-1}$ ):  $\tilde{\nu}$  = 3048 (w), 2955 (w), 2932 (w), 2540 (w), 2201 (m), 1603 (s), 1566 (m), 1508 (s), 1455 (m), 1439 (m), 1409 (m), 1292 (m), 1246 (m), 1172 (m), 1155 (m), 1132 (m), 1105 (m), 1022 (m), 923 (w), 899 (w), 826 (s), 786 (w), 767 (w), 663 (w), 642 (w), 609 (m), 532 (m), 415 (w). MS (EI, 70 eV): m/z (%): 600 ( $M^+$ , 40), 599 (90), 584 (5), 498 (3), 300 (5), 281 (4), 274 (3), 273 (4), 213 (4), 207 (7), 172 (2), 135 (16), 129 (21), 115 (13), 112 (6), 111 (5), 110 (4), 109 (3), 105 (4), 101 (16), 97 (10), 93 (9), 87 (17), 85 (19), 84 (20), 83 (17), 73 (78), 71 (24), 70 (15), 69 (26), 67 (11), 61 (14), 60 (100), 57 (40), 56 (19), 55 (44), 54 (6), 45 (22), 44 (97), 43 (83), 42 (18), 41 (54), 40 (33), 39 (20). HRMS (EI, 70 eV): calcd. for  $C_{41}H_{29}NO_4$  ( $M^+$ ): 599.20911, found 599.20875. Anal. calcd. for  $C_{41}H_{29}NO_4$  (599.67): C, 82.12; H, 4.87; N, 2.34. Found: C, 82.41; H, 5.124; N, 2.368.

### 2,3,5,6-Tetrakis((4-(trifluoromethyl)phenyl)ethynyl)pyridine (**8e**)

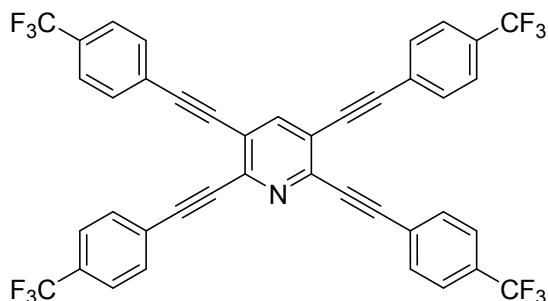

Starting with 3,5-dibromo-2,6-dichloropyridine **3** (100 mg, 0.327 mmol),  $PdCl_2(CH_3CN)_2$  (4.2 mg, 5.0 mol%), XPhos (15.6 mg, 10.0 mol%), 1-ethynyl-4-(trifluoromethyl)-benzene (0.426 mL, 2.616 mmol), CuI (3.1 mg, 5.0 mol%),  $HN(iPr)_2$  (1.0 mL, 7.115 mmol) and 1,4-dioxane (4.0 mL), **8e** was isolated as a yellow solid (228 mg, 93%); mp = 202-204 °C.  $^1H$  NMR (300 MHz,  $CDCl_3$ ):  $\delta$  = 7.61-7.70 (m, 16H, CH), 8.04 (s, 1H, CH).  $^{13}C$  NMR (75 MHz,  $CDCl_3$ ):  $\delta$  = 86.9 ( $C_{alkyne}$ ), 88.9 ( $C_{alkyne}$ ), 93.7 ( $C_{alkyne}$ ), 96.6 ( $C_{alkyne}$ ), 121.5 (C), 124.3 (q,  $^1J_{C-F}$  = 273.1 Hz,  $CF_3$ ), 124.3 (q,  $^1J_{C-F}$  = 273.1 Hz,  $CF_3$ ), 125.6 (q,  $^3J_{C-F}$  = 4.8 Hz, CH), 125.7 (q,  $^3J_{C-F}$  = 4.9 Hz, CH), 125.8 (C), 125.8 (C), 131.1 (q,  $^2J_{C-F}$  = 32.8 vHz, C), 131.3 (q,  $^2J_{C-F}$

= 32.8 Hz, C), 131.9 (CH), 132.3 (CH), 141.7 (CH), 143.6 (C).  $^{19}\text{F}$  NMR (282.4 MHz,  $\text{CDCl}_3$ ):  $\delta$  = -62.6 ( $\text{CF}_3$ ), -62.6 ( $\text{CF}_3$ ). IR (ATR,  $\text{cm}^{-1}$ ):  $\tilde{\nu}$  = 2211 (w), 1923 (w), 1613 (m), 1514 (m), 1416 (m), 1320 (s), 1162 (m), 1120 (m), 1102 (s), 1064 (s), 1015 (m), 913 (w), 835 (s), 770 (w), 755 (m), 687 (m), 592 (m), 524 (m), 483 (w). MS (EI, 70 eV):  $m/z$  (%): 752 ( $\text{M}^+$ , 39), 751 (100), 750 (8), 733 (3), 732 (6), 683 (2), 682 (5), 681 (3), 613 (2), 362 (3), 341 (39; 281 (1), 93 (5), 73 (7), 71 (3), 69 (3), 60 (9), 44 (12), 40 (5). HRMS (EI, 70 eV): calcd. for  $\text{C}_{41}\text{H}_{17}\text{F}_{12}\text{N}$  ( $\text{M}^+$ ): 751.11639, found 751.11596. Anal. calcd. for  $\text{C}_{41}\text{H}_{17}\text{F}_{12}\text{N}$  (751.56): C, 65.52; H, 2.28; N, 1.86. Found: C, 65.42; H, 2.189; N, 1.825.

### 2,3,5,6-Tetrakis(*m*-tolylethynyl)pyridine (**8f**)

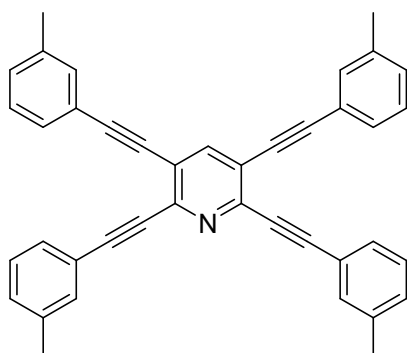

Starting with 3,5-dibromo-2,6-dichloropyridine **3** (100 mg, 0.327 mmol),  $\text{PdCl}_2(\text{CH}_3\text{CN})_2$  (4.2 mg, 5.0 mol%), XPhos (15.6 mg, 10.0 mol%), 1-ethynyl-3-methylbenzene (0.337 mL, 2.616 mmol), CuI (3.1 mg, 5.0 mol%),  $\text{HN}(i\text{Pr})_2$  (1.0 mL, 7.115 mmol) and 1,4-dioxane (4.0 mL), **8f** was isolated as a yellow solid (159 mg, 91%); mp = 160-162 °C.  $^1\text{H}$  NMR (400 MHz,  $\text{CDCl}_3$ ):  $\delta$  = 2.22 (s, 6H,  $\text{CH}_3$ ), 2.24 (s, 6H,  $\text{CH}_3$ ), 7.09-7.18 (m, 8H, CH), 7.29-7.39 (m, 8H, CH), 7.83 (s, 1H, CH).  $^{13}\text{C}$  NMR (100 MHz,  $\text{CDCl}_3$ ):  $\delta$  = 21.1 ( $\text{CH}_3$ ), 21.1 ( $\text{CH}_3$ ), 85.3 ( $\text{C}_{\text{alkyne}}$ ), 87.5 ( $\text{C}_{\text{alkyne}}$ ), 95.3 ( $\text{C}_{\text{alkyne}}$ ), 97.8 ( $\text{C}_{\text{alkyne}}$ ), 121.5 (C), 122.0 (C), 122.3 (C), 128.3 (CH), 128.3 (CH), 128.8 (CH), 129.2 (CH), 130.0 (CH), 130.2 (CH), 132.3 (CH), 132.8 (CH), 138.0 (C), 138.1 (C), 140.7 (CH), 143.6 (C). IR (ATR,  $\text{cm}^{-1}$ ):  $\tilde{\nu}$  = 3025 (w), 2947 (w), 2917 (w), 2856 (w), 2201 (m), 1599 (m), 1578 (m), 1483 (m), 1415 (m), 1377 (w), 1223 (w), 1189 (w), 1122 (w), 1091 (w), 1036 (w), 906 (m), 873 (m), 777 (s), 683 (s), 520 (w), 489 (m), 456 (m), 437 (m), 387 (w). MS (EI, 70 eV):  $m/z$  (%): 536 ( $\text{M}^+$ , 41), 535 (100), 534 (7), 533 (2), 520 (4), 505 (2), 252 (4), 244 (2), 73 (2), 60 (4), 44 (6), 43 (4). HRMS (EI, 70 eV): calcd. for  $\text{C}_{41}\text{H}_{29}\text{N}$  ( $\text{M}^+$ ): 535.22945, found 535.23043. Anal. calcd. for  $\text{C}_{41}\text{H}_{29}\text{N}$  (535.68): C, 91.93; H, 5.46; N, 2.61. Found: C, 91.53; H, 5.374; N, 2.471.

### 2,3,5,6-Tetrakis(4-phenylbut-1-ynyl)pyridine (**8g**)

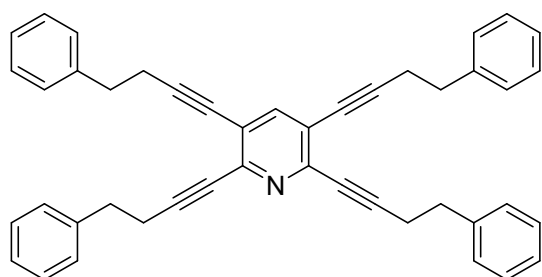

Starting with 3,5-dibromo-2,6-dichloropyridine **3** (100 mg, 0.327 mmol),  $\text{PdCl}_2(\text{CH}_3\text{CN})_2$  (4.2 mg, 5.0 mol%), XPhos (15.6 mg, 10.0 mol%), but-3-ynylbenzene (0.370 mL, 2.616 mmol), CuI (3.1 mg, 5.0 mol%),  $\text{HN}(i\text{Pr})_2$  (1.0 mL, 7.115 mmol) and 1,4-dioxane (4.0 mL), **8g** was isolated as a yellow solid (122 mg, 63%); mp = 104-106 °C.  $^1\text{H}$  NMR (400 MHz,  $\text{CDCl}_3$ ):  $\delta$  = 2.71-2.76 (m, 8H,  $\text{CH}_2$ ), 2.89-2.97 (m, 8H,  $\text{CH}_2$ ), 7.19-7.33 (m, 20 H, CH), 7.57 (s, 1H, CH).  $^{13}\text{C}$  NMR (100 MHz,  $\text{CDCl}_3$ ):  $\delta$  = 21.8 ( $\text{CH}_2$ ), 21.8

(CH<sub>2</sub>), 34.7 (CH<sub>2</sub>), 34.8 (CH<sub>2</sub>), 77.5 (C<sub>alkyne</sub>), 79.7 (C<sub>alkyne</sub>), 95.0 (C<sub>alkyne</sub>), 97.5 (C<sub>alkyne</sub>), 121.1 (C), 126.3 (CH), 126.4 (CH), 128.3 (CH), 128.3 (CH), 128.4 (CH), 128.4 (CH), 140.3 (C), 140.4 (C), 141.7 (CH), 143.2 (C). IR (ATR, cm<sup>-1</sup>):  $\tilde{\nu}$  = 3083 (w), 3023 (w), 2924 (w), 2855 (w), 2230 (m), 1717 (m), 1601 (m), 1494 (m), 1450 (m), 1413 (s), 1336 (w), 1250 (w), 1200 (w), 1074 (m), 1029 (m), 906 (m), 770 (m), 747 (m), 696 (s), 579 (w), 511 (m), 486 (w), 464 (w). MS (EI, 70 eV): m/z (%): 592 (M<sup>+</sup>, 21), 591 (68), 590 (100), 500 (17), 499 (6), 498 (7), 408 (16), 407 (6), 406 (7), 392 (7), 368 (4), 316 (5), 315 (5), 302 (3), 147 (4), 121 (14), 117 (3), 104 (4), 92 (4), 91 (29), 87 (3), 86 (2), 65 (3), 45 (3), 44 (8), 43 (5). HRMS (EI, 70 eV): calcd. for C<sub>45</sub>H<sub>37</sub>N (M<sup>+</sup>): 591.29205, found 591.29003.

## Synthesis of compounds 9 and 10

### 2,6-dichloro-3-(phenylethynyl)-5-(*p*-tolylethynyl)pyridine (9)

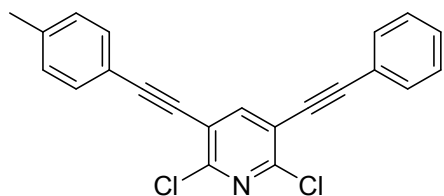

Starting with 3-bromo-2,6-dichloro-5-(phenylethynyl)-pyridine **7a** (100 mg, 0.306 mmol), Pd(dba)<sub>2</sub> (3.5 mg, 2 mol%), HP(tBu)<sub>3</sub>BF<sub>4</sub> (1.8 mg, 2.0 mol%), 4-Methylphenylacetylen (0.0427 mL, 0.337 mmol), Et<sub>3</sub>N (0.170 ml, 1.224 mmol) and THF (3 mL), **9a** was obtained as a yellow solid (85 mg, 77%); m.p = 132-133 °C. <sup>1</sup>H NMR (300 MHz, CDCl<sub>3</sub>):  $\delta$  = 2.39 (s, 3H, CH<sub>3</sub>), 7.19 (d, <sup>3</sup>J = 8.1 Hz, 2H, CH), 7.36-7.42 (m, 3H, CH), 7.46 (d, <sup>3</sup>J = 8.1 Hz, 2H, CH), 7.54-7.61 (m, 2H, CH), 7.96 (s, 1H, CH). <sup>13</sup>C NMR (75 MHz, CDCl<sub>3</sub>):  $\delta$  = 21.8 (CH<sub>3</sub>), 82.4 (C<sub>alkyne</sub>), 82.9 (C<sub>alkyne</sub>), 98.2 (C<sub>alkyne</sub>), 98.7 (C<sub>alkyne</sub>), 118.9 (C), 119.3 (C), 119.6 (C), 122.0 (C), 128.7 (CH), 129.4 (CH), 129.6 (CH), 131.9 (CH), 131.9 (CH), 140.0 (C), 144.7 (CH), 149.4 (C), 149.5 (C). IR (ATR, cm<sup>-1</sup>):  $\tilde{\nu}$  = 2956 (w), 2920 (w), 2854 (w), 2208 (m), 1572 (w), 1502 (m), 1487 (m), 1443 (m), 1392 (m), 1382 (s), 1275 (m), 1227 (m), 1155 (m), 1107 (s), 1066 (m), 1003 (m), 987 (m), 910 (s), 810 (s), 789 (m), 752 (vs), 732 (s), 683 (s), 677 (s), 640 (s), 613 (s), 561 (m), 528 (vs). GC-MS (EI, 70 eV): m/z (%): 365 (11), 364 (15), 363 (66), 362 (25), 361 (M<sup>+</sup>, 100), 290 (19), 289 (11), 288 (23), 263 (8), 181 (16), 145 (8), 139 (9), 131 (15). HRMS (EI, 70 eV): calcd. for C<sub>22</sub>H<sub>13</sub>NCl<sub>2</sub> (M<sup>+</sup>): 361.04196, found 361.04161; calcd. for C<sub>22</sub>H<sub>13</sub>NCl<sup>37</sup>Cl (M<sup>+</sup>): 363.03901, found 363.03870; calcd. for C<sub>22</sub>H<sub>13</sub>N<sup>37</sup>Cl<sub>2</sub> (M<sup>+</sup>): 365.03606, found 365.03696.

### 2,6-bis((4-methoxyphenyl)ethynyl)-3-(phenylethynyl)-5-(*p*-tolylethynyl)pyridine (10)

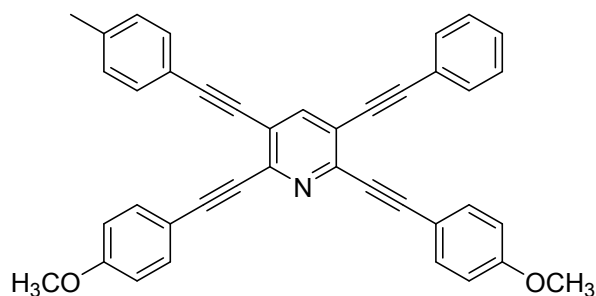

Starting with 2,6-dichloro-3-(phenylethynyl)-5-(*p*-tolylethynyl)pyridine **9a** (100 mg, 0.276 mmol), PdCl<sub>2</sub>(CH<sub>3</sub>CN)<sub>2</sub> (3.6 mg, 5.0 mol%), X-Phos (13.2 mg, 10 mol%), CuI (2.6 mg, 5 mol%), 4-Methoxyphenylacetylen (0.132 mL, 1.021 mmol), (*i*PrO)<sub>2</sub>NH (0.126 ml, 0.897 mmol) and dioxane (3 mL), **10a** was obtained as an orange solid (151 mg, 99%); m.p. = 188-189 °C. <sup>1</sup>H NMR (300 MHz, CDCl<sub>3</sub>): δ = 2.39 (s, 3H, CH<sub>3</sub>), 3.83 (s, 3H, OCH<sub>3</sub>), 3.83 (s, 3H, OCH<sub>3</sub>), 6.88 (d, <sup>3</sup>J = 8.9 Hz, 2H, CH), 6.88 (d, <sup>3</sup>J = 8.9 Hz, 2H, CH), 7.18 (d, <sup>3</sup>J = 7.9 Hz, 2H, CH), 7.35-7.41 (m, 3H, CH), 7.48 (d, <sup>3</sup>J = 8.1 Hz, 2H, CH), 7.56-7.61 (m, 2H, CH), 7.58 (d, <sup>3</sup>J = 8.8 Hz, 2H, CH), 7.59 (d, <sup>3</sup>J = 8.8 Hz, 2H, CH), 7.93 (s, 1H, CH). <sup>13</sup>C NMR (75 MHz, CDCl<sub>3</sub>): δ = 21.7 (CH<sub>3</sub>), 55.4 (OCH<sub>3</sub>), 55.4 (OCH<sub>3</sub>), 85.2 (C<sub>alkyne</sub>), 85.8 (C<sub>alkyne</sub>), 87.0 (C<sub>alkyne</sub>), 87.1 (C<sub>alkyne</sub>), 95.8 (C<sub>alkyne</sub>), 95.8 (C<sub>alkyne</sub>), 97.4 (C<sub>alkyne</sub>), 97.8 (C<sub>alkyne</sub>), 114.3 (CH), 114.3 (C), 114.4 (C), 119.6 (C), 120.9 (C), 121.1 (C), 122.7 (C), 128.6 (CH), 129.2 (CH), 129.4 (CH), 131.8 (CH), 131.8 (CH), 134.0 (CH), 139.5 (CH), 141.1 (CH), 143.7 (C), 143.8 (C), 160.7 (C). IR (ATR, cm<sup>-1</sup>):  $\tilde{\nu}$  = 2957 (w), 2934 (w), 2200 (w), 1725 (w), 1603 (m), 1566 (w), 1508 (s), 1456 (m), 1440 (m), 1410 (m), 1290 (m), 1246 (s), 1174 (m), 1157 (s), 1105 (m), 1030 (s), 924 (m), 820 (vs), 802 (s), 752 (vs), 689 (s), 577 (m), 528 (vs). GC-MS (ESI, 70 eV): m/z (%): 554 (18), 553 (M<sup>+</sup>, 49), 276 (5), 207 (9), 84 (5), 57 (5), 44 (51), 43 (9), 40 (100). HRMS (ESI, 70 eV): calcd. for C<sub>40</sub>H<sub>27</sub>NO<sub>2</sub> (M+H<sup>+</sup>): 554.21146, found 554.21119.

# 1H- and 13C-NMR Spectra of compounds 4a-g

Reimann/ SRE- SP- 44  
AulH CDCl3 /opt/topspin 1206 46

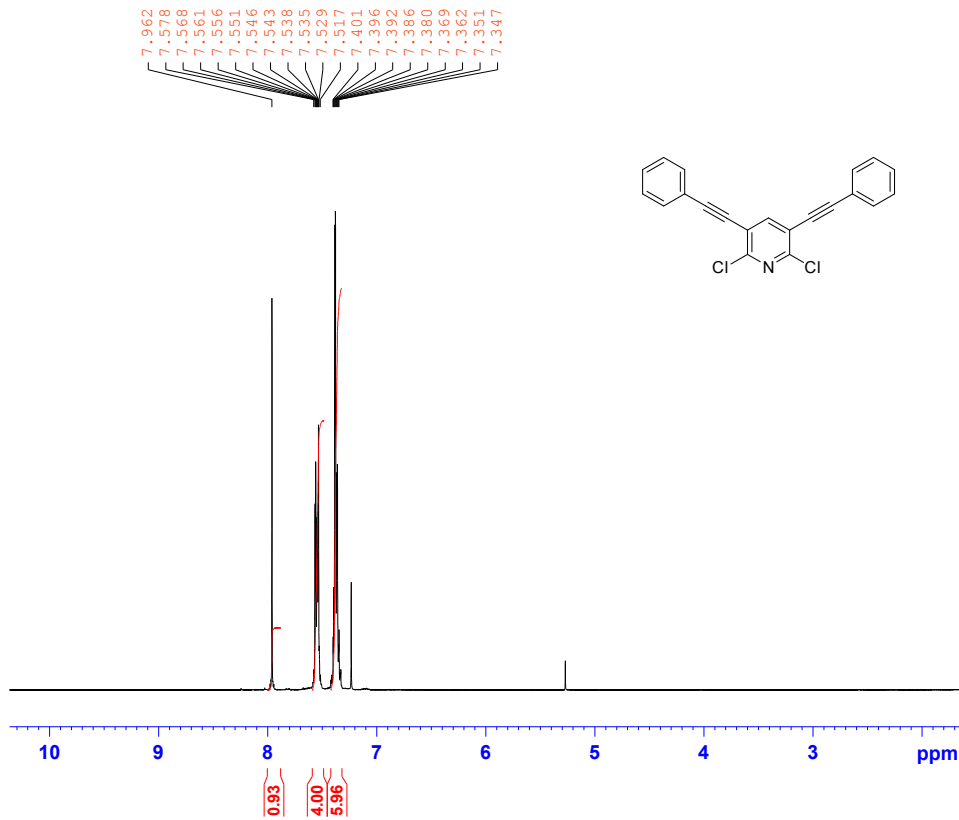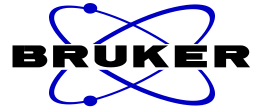

Current Data Parameters  
NAME SRE SP44 1H  
EXPNO 10  
PROCNO 1

F2 - Acquisition Parameters  
Date\_ 20120623  
Time\_ 16.39  
INSTRUM AV300  
PROBHD 5 mm PABBO BB-  
PULPROG zg30  
TD 32768  
SOLVENT CDCl3  
NS 32  
DS 4  
SWH 6172.839 Hz  
FIDRES 0.188380 Hz  
AQ 2.6542580 sec  
RG 322.5  
DW 81.000 usec  
DE 6.00 usec  
TE 296.0 K  
D1 1.0000000 sec  
TD0 1

===== CHANNEL f1 =====  
NUC1 1H  
P1 11.00 usec  
PL1 0.00 dB  
SFO1 300.1318534 MHz

F2 - Processing parameters  
SI 32768  
SF 300.1300228 MHz  
WDW EM  
SSB 0  
LB 0.10 Hz  
GB 0  
PC 1.00

Reimann/ SRE- SP- 44  
Aul3C CDCl3 /opt/topspin 1206 46

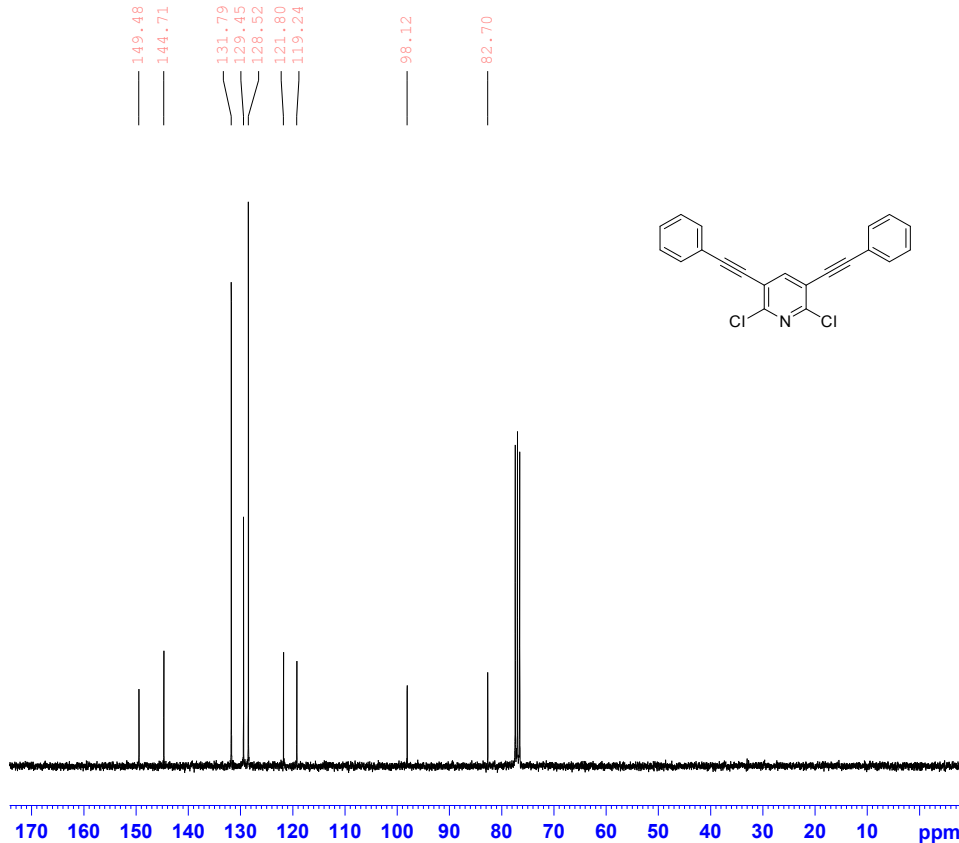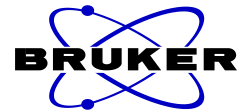

Current Data Parameters  
NAME SRE SP44 13C  
EXPNO 11  
PROCNO 1

F2 - Acquisition Parameters  
Date\_ 20120623  
Time\_ 17.03  
INSTRUM AV300  
PROBHD 5 mm PABBO BB-  
PULPROG zgpg30  
TD 32768  
SOLVENT CDCl3  
NS 500  
DS 4  
SWH 21097.047 Hz  
FIDRES 0.643831 Hz  
AQ 0.7766516 sec  
RG 32768  
DW 23.700 usec  
DE 6.00 usec  
TE 296.5 K  
D1 2.0000000 sec  
d11 0.0300000 sec  
DELTA 1.89999998 sec  
TD0 1

===== CHANNEL f1 =====  
NUC1 13C  
P1 9.60 usec  
PL1 -1.10 dB  
SFO1 75.4771825 MHz

===== CHANNEL f2 =====  
CPDPRG2 waltz16  
NUC2 1H  
PCPD2 100.00 usec  
PL2 0.00 dB  
PL12 19.00 dB  
PL13 21.00 dB  
SFO2 300.1312005 MHz

F2 - Processing parameters  
SI 32768  
SF 75.4677549 MHz  
WDW EM  
SSB 0  
LB 1.00 Hz  
GB 0  
PC 1.40

Reimann/ SRE 838  
 Au1H CDCl3 /opt/topspin 1206 7

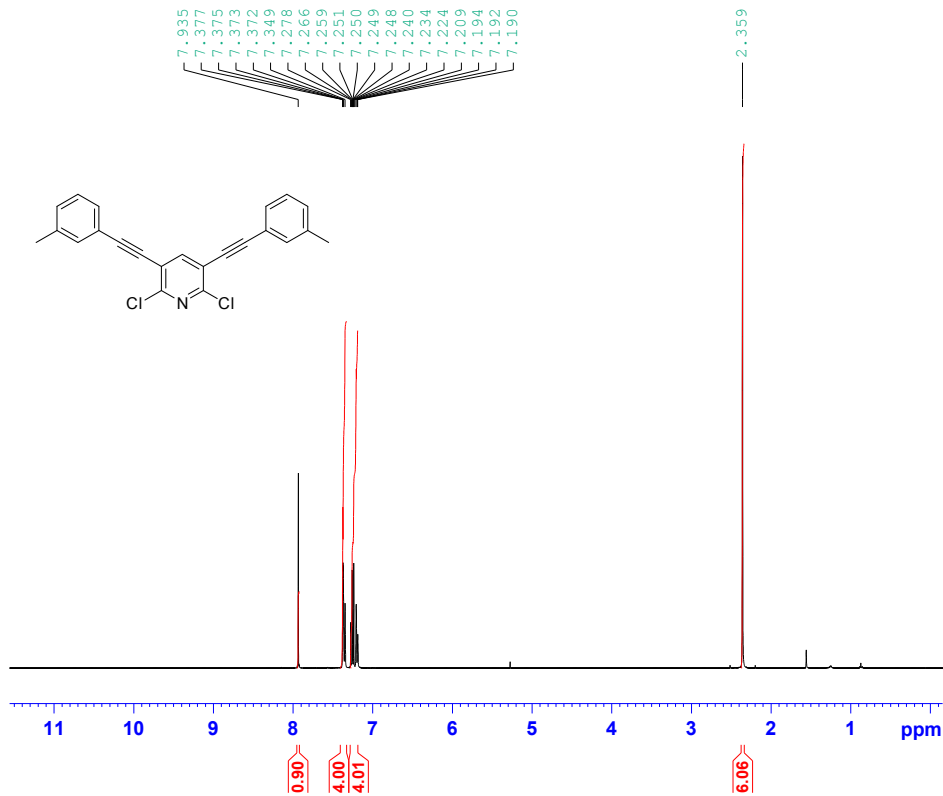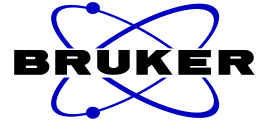

Current Data Parameters  
 NAME SRE 838 1H  
 EXPNO 10  
 PROCNO 1

F2 - Acquisition Parameters  
 Date\_ 20120628  
 Time\_ 19.06  
 INSTRUM AV400  
 PROBHD 5 mm QNP 1H/29  
 PULPROG zg30  
 TD 32768  
 SOLVENT CDCl3  
 NS 32  
 DS 4  
 SWH 8012.820 Hz  
 FIDRES 0.244532 Hz  
 AQ 2.0447731 sec  
 RG 181  
 DW 62.400 usec  
 DE 6.00 usec  
 TE 297.0 K  
 D1 1.50000000 sec  
 TD0 1

==== CHANNEL f1 =====  
 NUC1 1H  
 P1 12.20 usec  
 PL1 -1.00 dB  
 SFO1 400.1324000 MHz

F2 - Processing parameters  
 SI 32768  
 SF 400.1300294 MHz  
 WDW EM  
 SSB 0  
 LB 0.10 Hz  
 GB 0  
 PC 1.00

Reimann/ SRE 838  
 Au13C CDCl3 /opt/topspin 1206 7

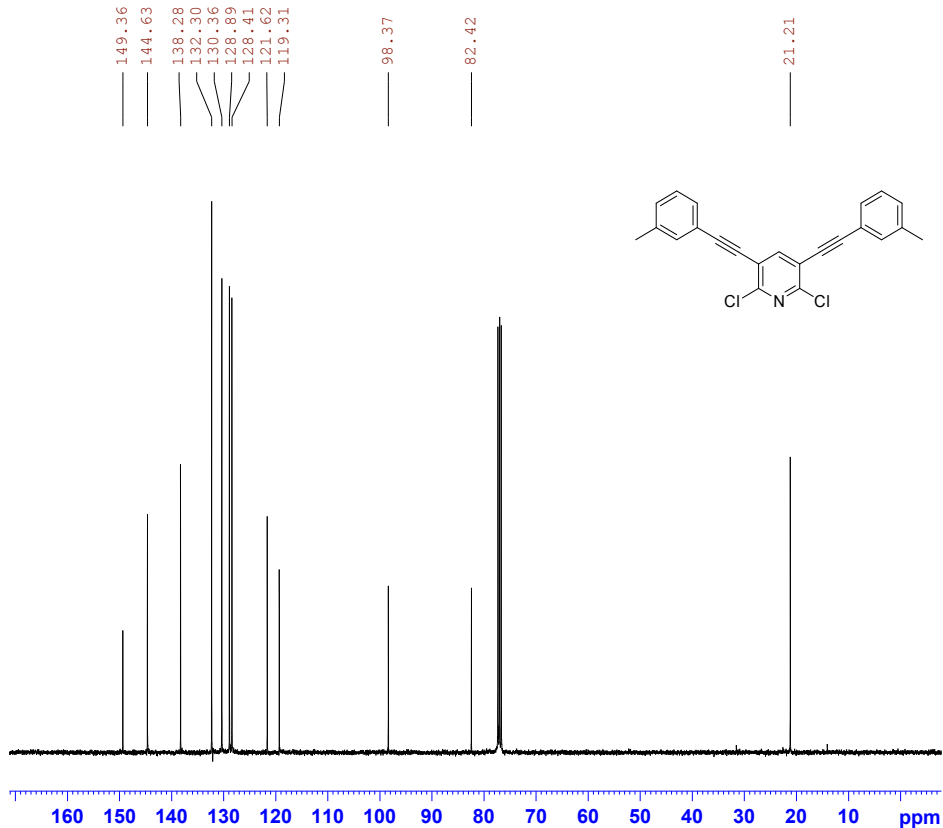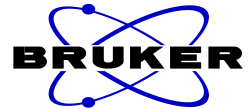

Current Data Parameters  
 NAME SRE 838 13C  
 EXPNO 11  
 PROCNO 1

F2 - Acquisition Parameters  
 Date\_ 20120628  
 Time\_ 19.54  
 INSTRUM AV400  
 PROBHD 5 mm QNP 1H/29  
 PULPROG zgpg30  
 TD 65536  
 SOLVENT CDCl3  
 NS 1000  
 DS 4  
 SWH 29940.119 Hz  
 FIDRES 0.456850 Hz  
 AQ 1.0945013 sec  
 RG 13004  
 DW 16.700 usec  
 DE 6.00 usec  
 TE 297.0 K  
 D1 1.70000005 sec  
 d11 0.03000000 sec  
 DELTA 1.60000002 sec  
 TD0 1

==== CHANNEL f1 =====  
 NUC1 13C  
 P1 10.00 usec  
 PL1 -1.00 dB  
 SFO1 100.6260690 MHz

==== CHANNEL f2 =====  
 CPDPRG2 waltz16  
 NUC2 1H  
 PCPD2 100.00 usec  
 PL2 -1.00 dB  
 PL12 19.00 dB  
 PL13 21.00 dB  
 SFO2 400.1318000 MHz

F2 - Processing parameters  
 SI 32768  
 SF 100.6127770 MHz  
 WDW EM  
 SSB 0  
 LB 1.00 Hz  
 GB 0  
 PC 1.00

Reimann/ SRE 836  
Au1H CDC13 /opt/topspin 1206 8

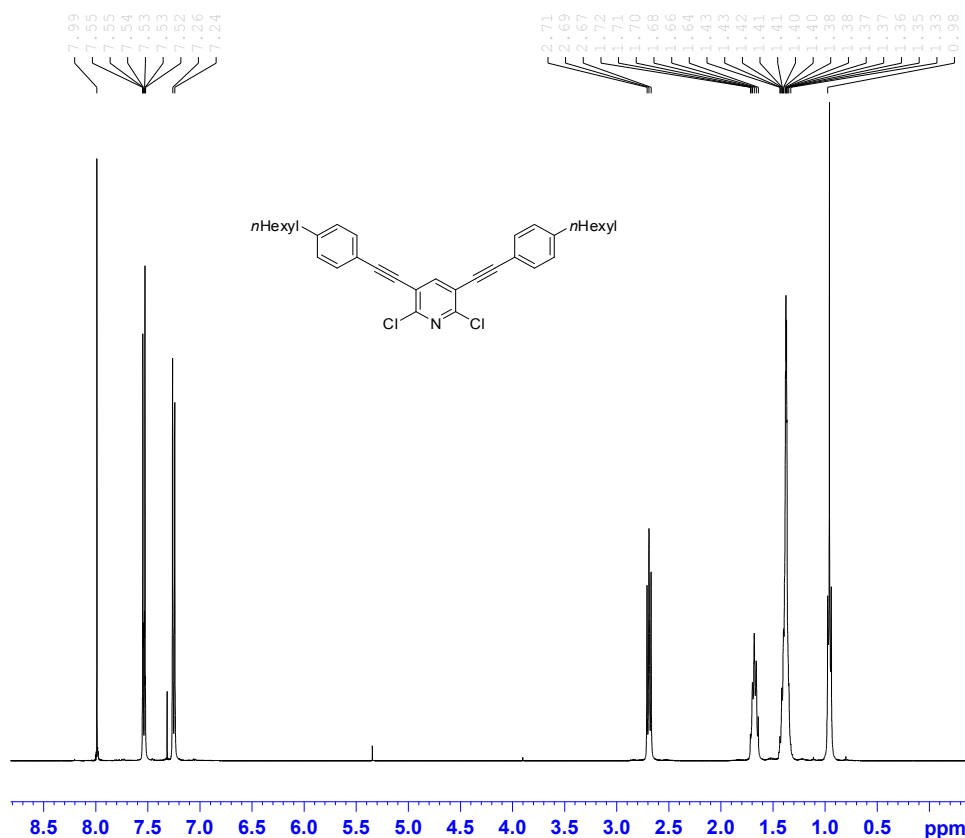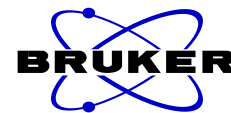

Current Data Parameters  
NAME SRE 836 1H  
EXPNO 10  
PROCNO 1

F2 - Acquisition Parameters  
Date\_ 20120628  
Time\_ 20.09  
INSTRUM AV400  
PROBHD 5 mm QNP 1H/29  
PULPROG zg30  
TD 32768  
SOLVENT CDC13  
NS 32  
DS 4  
SWH 8012.820 Hz  
FIDRES 0.244532 Hz  
AQ 2.0447731 sec  
RG 45.3  
DW 62.400 usec  
DE 6.00 usec  
TE 297.0 K  
D1 1.50000000 sec  
TD0 1

==== CHANNEL f1 =====  
NUC1 1H  
P1 12.20 usec  
PL1 -1.00 dB  
SFO1 400.1324000 MHz

F2 - Processing parameters  
SI 32768  
SF 400.1300000 MHz  
WDW EM  
SSB 0  
LB 0.10 Hz  
GB 0  
PC 1.00

Reimann/ SRE 836  
Au13C CDC13 /opt/topspin 1206 8

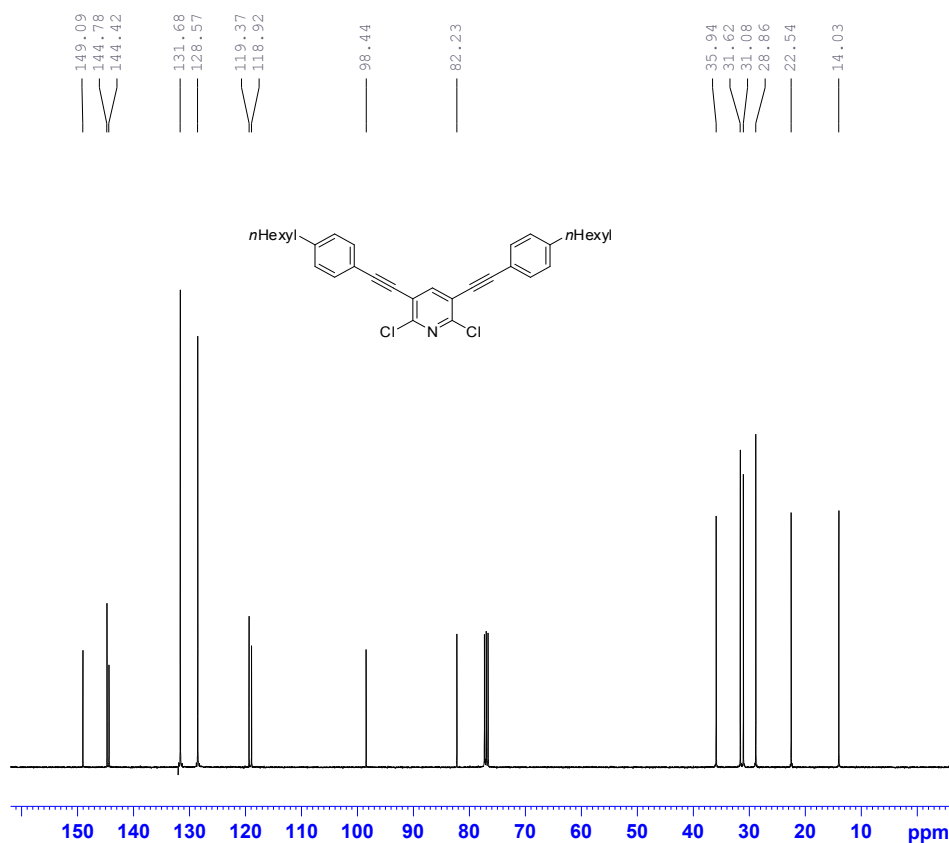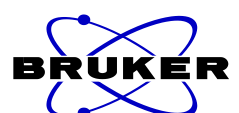

Current Data Parameters  
NAME SRE 836 13C  
EXPNO 11  
PROCNO 1

F2 - Acquisition Parameters  
Date\_ 20120628  
Time\_ 20.58  
INSTRUM AV400  
PROBHD 5 mm QNP 1H/29  
PULPROG zgpg30  
TD 65536  
SOLVENT CDC13  
NS 1000  
DS 4  
SWH 29940.119 Hz  
FIDRES 0.456850 Hz  
AQ 1.0945013 sec  
RG 9195.2  
DW 16.700 usec  
DE 6.00 usec  
TE 297.0 K  
D1 1.70000005 sec  
d11 0.03000000 sec  
DELTA 1.60000002 sec  
TD0 1

==== CHANNEL f1 =====  
NUC1 13C  
P1 10.00 usec  
PL1 -1.00 dB  
SFO1 100.6260690 MHz

==== CHANNEL f2 =====  
CPDPRG2 waltz16  
NUC2 1H  
PCPD2 100.00 usec  
PL2 -1.00 dB  
PL12 19.00 dB  
PL13 21.00 dB  
SFO2 400.1318000 MHz

F2 - Processing parameters  
SI 32768  
SF 100.6127816 MHz  
WDW EM  
SSB 0  
LB 1.00 Hz  
GB 0  
PC 1.00

Reimann/ SRE 843  
 Au1H CDC13 /opt/topspin 1207 5

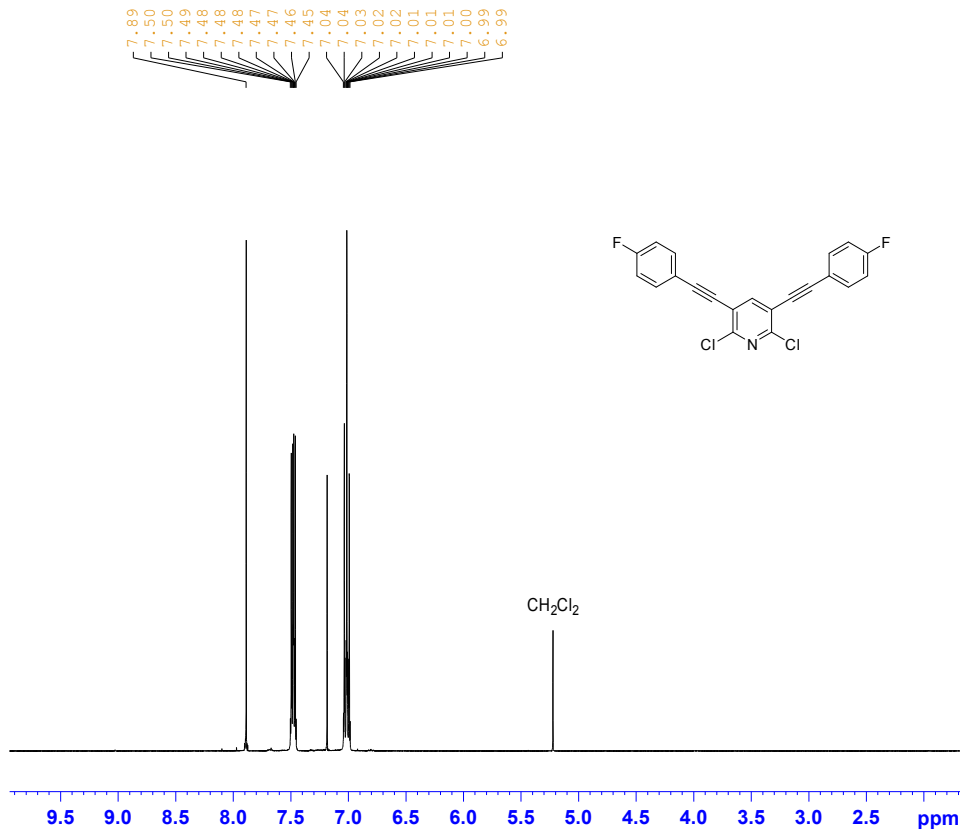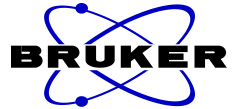

Current Data Parameters  
 NAME SRE 843 1H  
 EXPNO 10  
 PROCNO 1

F2 - Acquisition Parameters  
 Date\_ 20120723  
 Time 19.21  
 INSTRUM AV400  
 PROBHD 5 mm PABBO BB-  
 PULPROG zg30  
 TD 32768  
 SOLVENT CDC13  
 NS 32  
 DS 4  
 SWH 8012.820 Hz  
 FIDRES 0.244532 Hz  
 AQ 2.0447731 sec  
 RG 512  
 DW 62.400 usec  
 DE 6.00 usec  
 TE 297.0 K  
 D1 1.50000000 sec  
 TD0 1

===== CHANNEL f1 =====  
 NUC1 1H  
 P1 11.10 usec  
 PL1 -1.00 dB  
 SFO1 400.1324000 MHz

F2 - Processing parameters  
 SI 32768  
 SF 400.1300513 MHz  
 WDW EM  
 SSB 0  
 LB 0.10 Hz  
 GB 0  
 PC 1.00

Reimann/ SRE 843  
 Au13C CDC13 /opt/topspin 1207 5

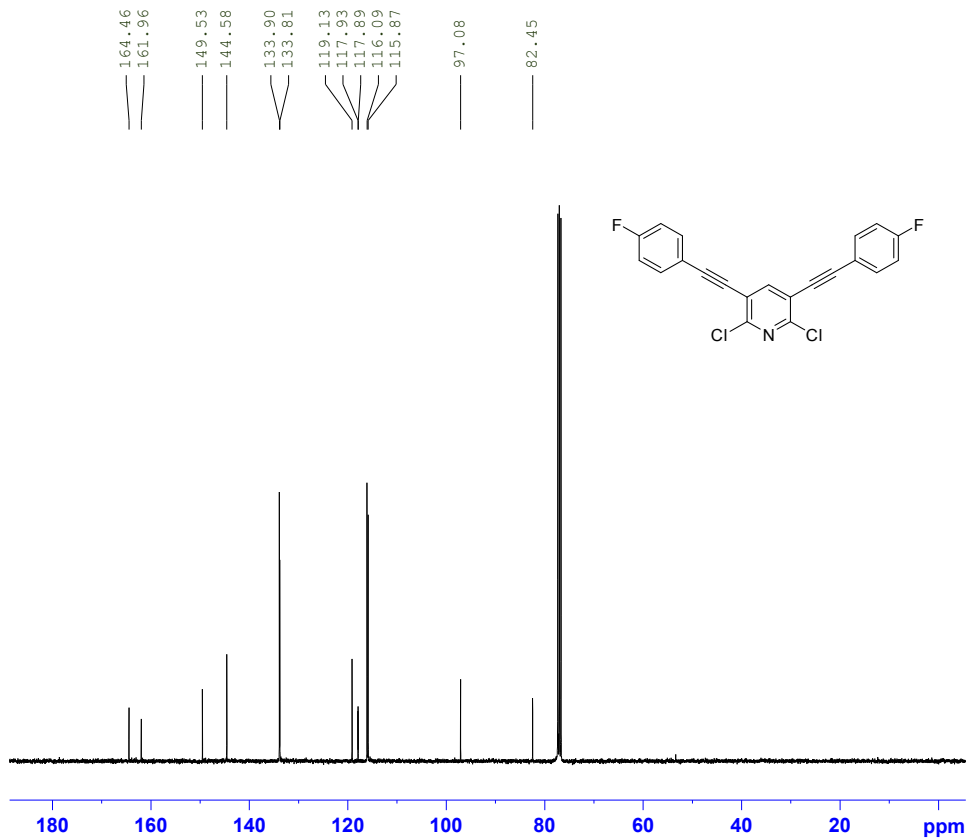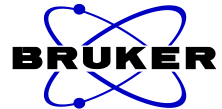

Current Data Parameters  
 NAME SRE 843 13C  
 EXPNO 11  
 PROCNO 1

F2 - Acquisition Parameters  
 Date\_ 20120723  
 Time 20.57  
 INSTRUM AV400  
 PROBHD 5 mm PABBO BB-  
 PULPROG zgpg30  
 TD 65536  
 SOLVENT CDC13  
 NS 2000  
 DS 4  
 SWH 29940.119 Hz  
 FIDRES 0.456850 Hz  
 AQ 1.0945013 sec  
 RG 20642.5  
 DW 16.700 usec  
 DE 6.00 usec  
 TE 297.0 K  
 D1 1.70000005 sec  
 d11 0.03000000 sec  
 DELTA 1.60000002 sec  
 TD0 1

===== CHANNEL f1 =====  
 NUC1 13C  
 P1 10.00 usec  
 PL1 -0.50 dB  
 SFO1 100.6260690 MHz

===== CHANNEL f2 =====  
 CPDPRG2 waltz16  
 NUC2 1H  
 PCPD2 100.00 usec  
 PL2 -2.00 dB  
 PL12 17.00 dB  
 PL13 19.00 dB  
 SFO2 400.1318000 MHz

F2 - Processing parameters  
 SI 32768  
 SF 100.6127746 MHz  
 WDW EM  
 SSB 0  
 LB 1.00 Hz  
 GB 0  
 PC 1.00



Reimann/ SRE 837  
 AulH CDCl3 /opt/topspin 1206 4

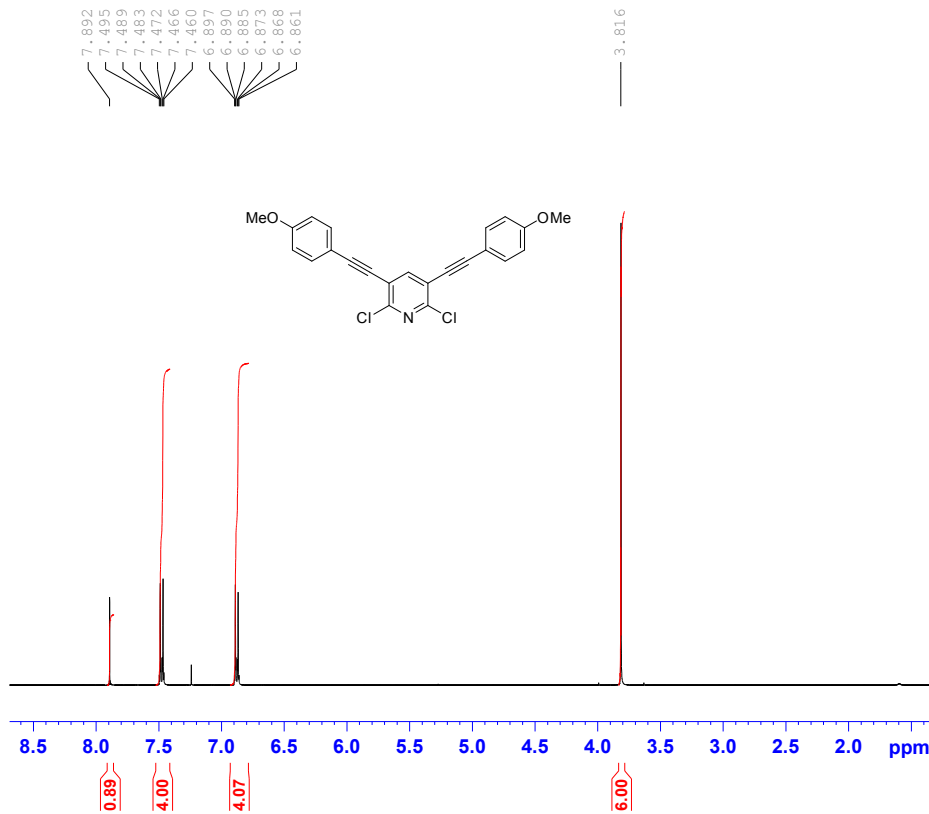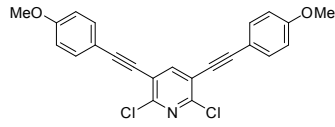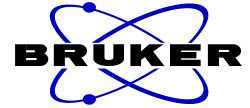

Current Data Parameters  
 NAME SRE 837 1H  
 EXPNO 10  
 PROCNO 1

F2 - Acquisition Parameters  
 Date\_ 20120628  
 Time 16.43  
 INSTRUM AV400  
 PROBHD 5 mm QNP 1H/29  
 PULPROG zg30  
 TD 32768  
 SOLVENT CDCl3  
 NS 32  
 DS 4  
 SWH 8012.820 Hz  
 FIDRES 0.244532 Hz  
 AQ 2.0447731 sec  
 RG 161.3  
 DW 62.400 usec  
 DE 6.00 usec  
 TE 297.0 K  
 D1 1.50000000 sec  
 TDO 1

===== CHANNEL f1 =====  
 NUC1 1H  
 P1 12.20 usec  
 PL1 -1.00 dB  
 SFO1 400.1324000 MHz

F2 - Processing parameters  
 SI 32768  
 SF 400.1300291 MHz  
 WDW EM  
 SSB 0  
 LB 0.10 Hz  
 GB 0  
 FC 1.00

Reimann/ SRE 837  
 Au13C CDCl3 /opt/topspin 1206 4

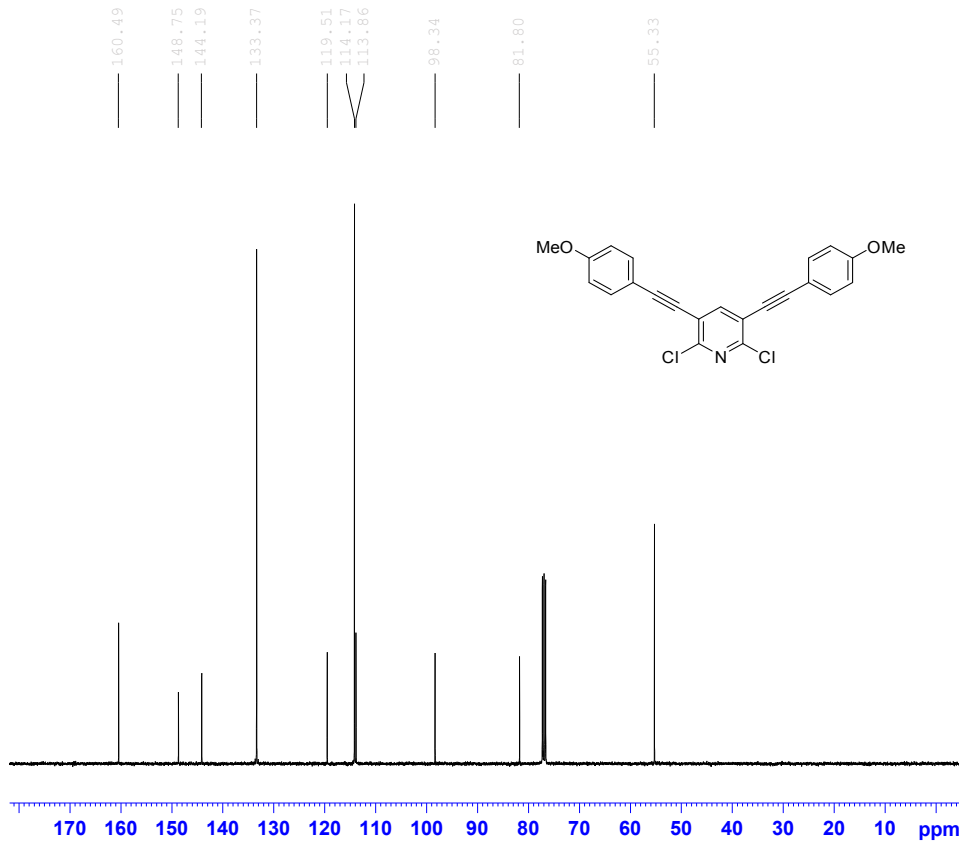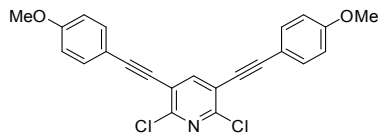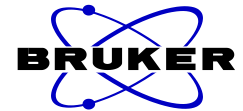

Current Data Parameters  
 NAME SRE 837 13C  
 EXPNO 11  
 PROCNO 1

F2 - Acquisition Parameters  
 Date\_ 20120628  
 Time 17.07  
 INSTRUM AV400  
 PROBHD 5 mm QNP 1H/29  
 PULPROG zgpg30  
 TD 65536  
 SOLVENT CDCl3  
 NS 500  
 DS 4  
 SWH 29940.119 Hz  
 FIDRES 0.456850 Hz  
 AQ 1.0945013 sec  
 RG 10321.3  
 DW 16.700 usec  
 DE 6.00 usec  
 TE 297.0 K  
 D1 1.70000005 sec  
 d11 0.03000000 sec  
 DELTA 1.60000002 sec  
 TDO 1

===== CHANNEL f1 =====  
 NUC1 13C  
 P1 10.00 usec  
 PL1 -1.00 dB  
 SFO1 100.6260690 MHz

===== CHANNEL f2 =====  
 CPDPRG2 waltz16  
 NUC2 1H  
 PCPD2 100.00 usec  
 PL2 -1.00 dB  
 PL12 19.00 dB  
 PL13 21.00 dB  
 SFO2 400.1318000 MHz

F2 - Processing parameters  
 SI 32768  
 SF 100.6127774 MHz  
 WDW EM  
 SSB 0  
 LB 1.00 Hz  
 GB 0  
 PC 1.00

Reimann/ SRE 841  
 AulH CDC13 /opt/topspin 1206 12

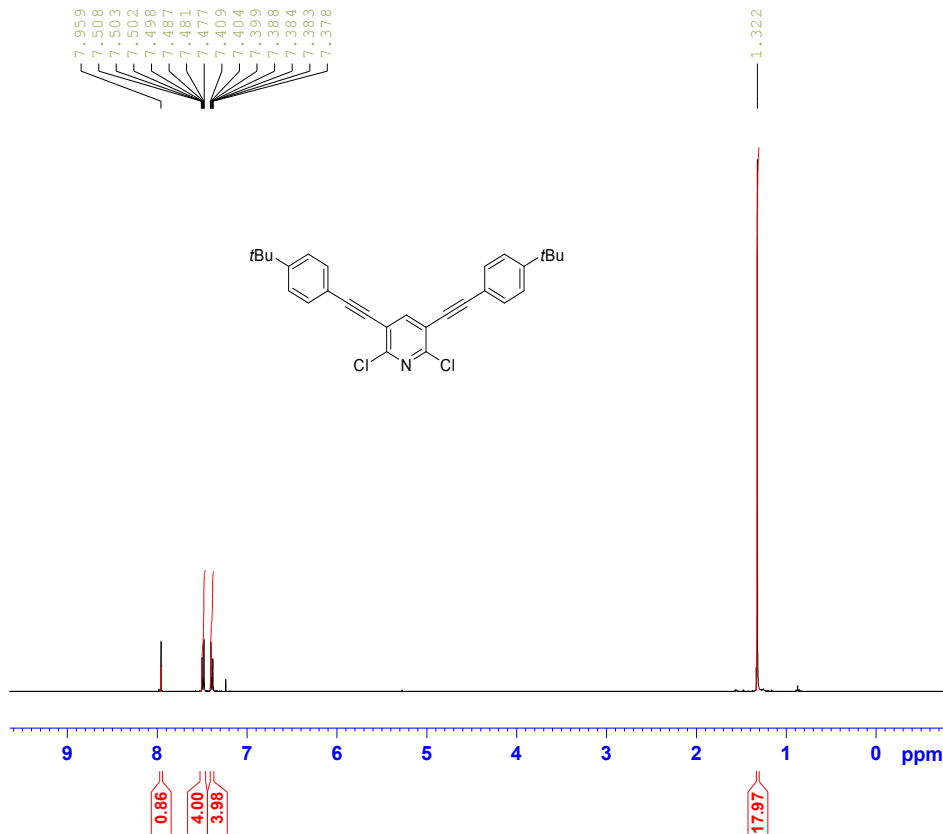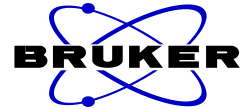

Current Data Parameters  
 NAME SRE 841 1H  
 EXPNO 10  
 PROCNO 1

F2 - Acquisition Parameters  
 Date\_ 20120629  
 Time 1.59  
 INSTRUM AV400  
 PROBHD 5 mm QNP 1H/29  
 PULPROG zg30  
 TD 32768  
 SOLVENT CDC13  
 NS 32  
 DS 4  
 SWH 8012.820 Hz  
 FIDRES 0.244532 Hz  
 AQ 2.0447731 sec  
 RG 101.6  
 DW 62.400 usec  
 DE 6.00 usec  
 TE 297.0 K  
 D1 1.50000000 sec  
 TD0 1

==== CHANNEL f1 =====  
 NUC1 1H  
 P1 12.20 usec  
 PL1 -1.00 dB  
 SFO1 400.1324000 MHz

F2 - Processing parameters  
 SI 32768  
 SF 400.1300298 MHz  
 WDW EM  
 SSB 0  
 LB 0.10 Hz  
 GB 0  
 PC 1.00

Reimann/ SRE 841  
 Aul3C CDC13 /opt/topspin 1206 12

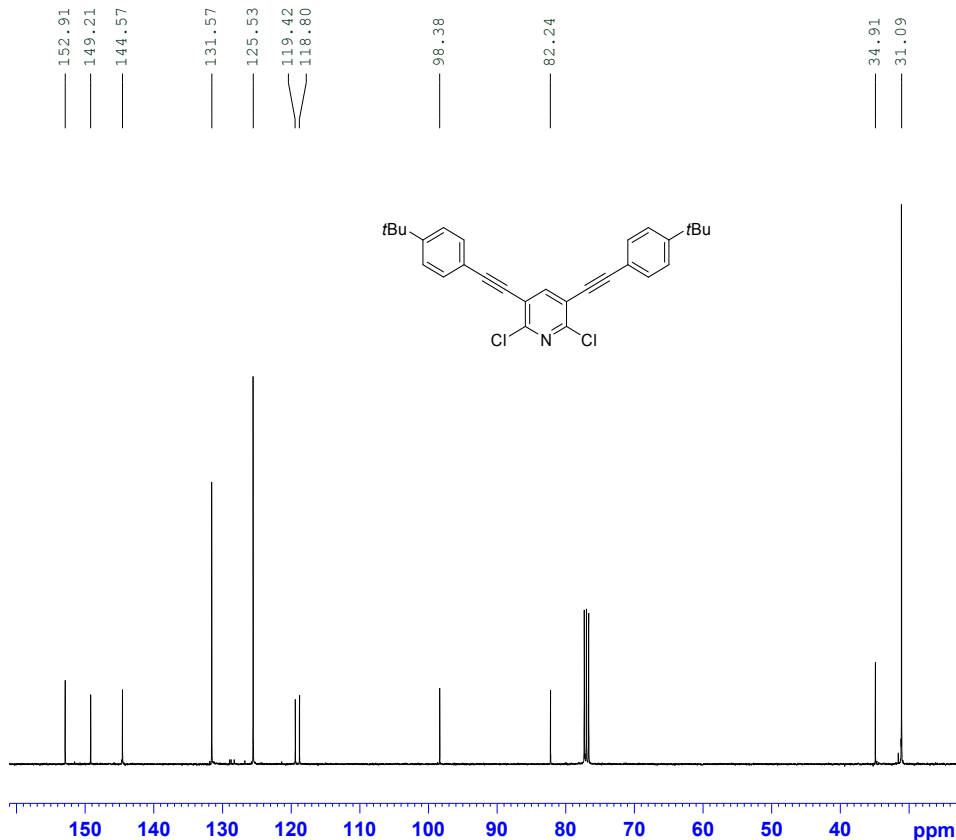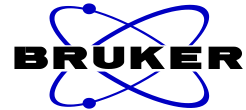

Current Data Parameters  
 NAME SRE 841 13C  
 EXPNO 11  
 PROCNO 1

F2 - Acquisition Parameters  
 Date\_ 20120629  
 Time 2.48  
 INSTRUM AV400  
 PROBHD 5 mm QNP 1H/29  
 PULPROG zgpg30  
 TD 65536  
 SOLVENT CDC13  
 NS 1000  
 DS 4  
 SWH 29940.119 Hz  
 FIDRES 0.456850 Hz  
 AQ 1.0945013 sec  
 RG 13004  
 DW 16.700 usec  
 DE 6.00 usec  
 TE 297.0 K  
 D1 1.70000005 sec  
 d11 0.03000000 sec  
 DELTA 1.60000002 sec  
 TD0 1

==== CHANNEL f1 =====  
 NUC1 13C  
 P1 10.00 usec  
 PL1 -1.00 dB  
 SFO1 100.6260690 MHz

==== CHANNEL f2 =====  
 CPDPRG2 waltz16  
 NUC2 1H  
 P2 100.00 usec  
 PL2 -1.00 dB  
 PL12 19.00 dB  
 PL13 21.00 dB  
 SFO2 400.1318000 MHz

F2 - Processing parameters  
 SI 32768  
 SF 100.6127773 MHz  
 WDW EM  
 SSB 0  
 LB 1.00 Hz  
 GB 0  
 PC 1.00

Reimann/ SRE 842  
AulH CDC13 /opt/topspin 1206 11

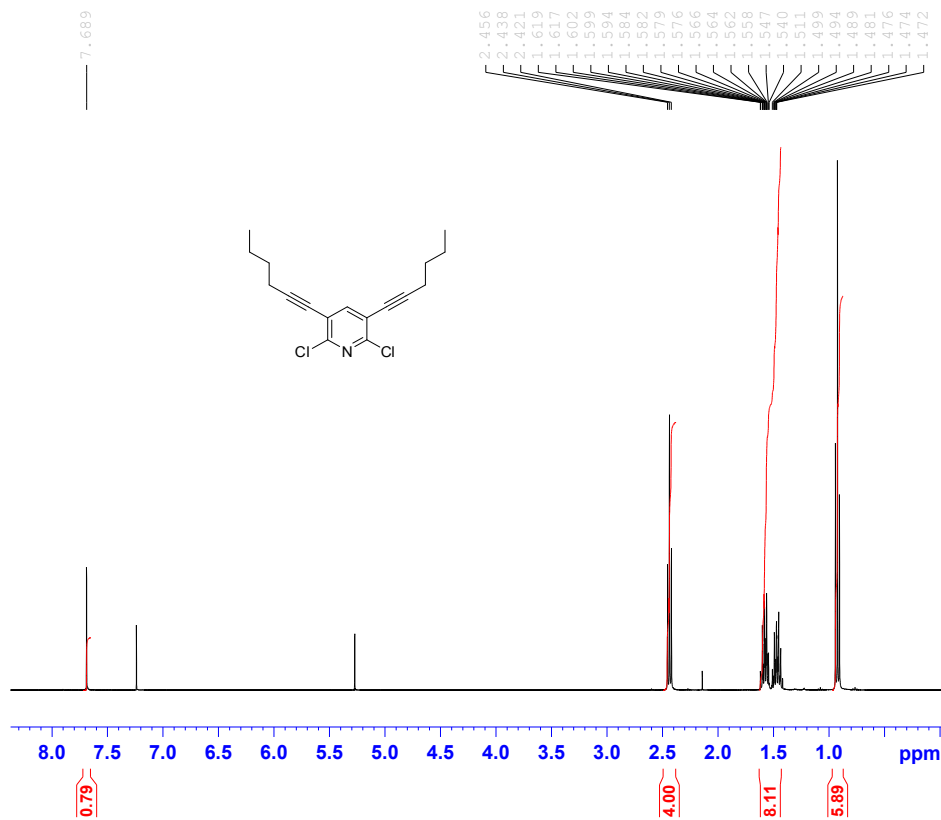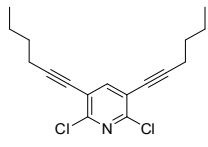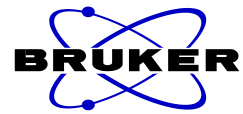

Current Data Parameters  
NAME SRE 842 1H  
EXPNO 10  
PROCNO 1

F2 - Acquisition Parameters  
Date\_ 20120629  
Time 0.08  
INSTRUM AV400  
PROBHD 5 mm QNP 1H/29  
PULPROG zg30  
TD 32768  
SOLVENT CDC13  
NS 32  
DS 4  
SWH 8012.820 Hz  
FIDRES 0.244532 Hz  
AQ 2.0447731 sec  
RG 161.3  
DW 62.400 usec  
DE 6.00 usec  
TE 297.0 K  
D1 1.5000000 sec  
TD0 1

==== CHANNEL f1 =====  
NUC1 1H  
P1 12.20 usec  
PL1 -1.00 dB  
SFO1 400.1324000 MHz

F2 - Processing parameters  
SI 32768  
SF 400.1300299 MHz  
WDW EM  
SSB 0  
LB 0.10 Hz  
GB 0  
PC 1.00

Reimann/ SRE 842  
Aul3C CDCl3 /opt/topspin 1206 11

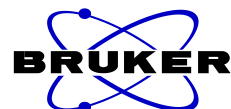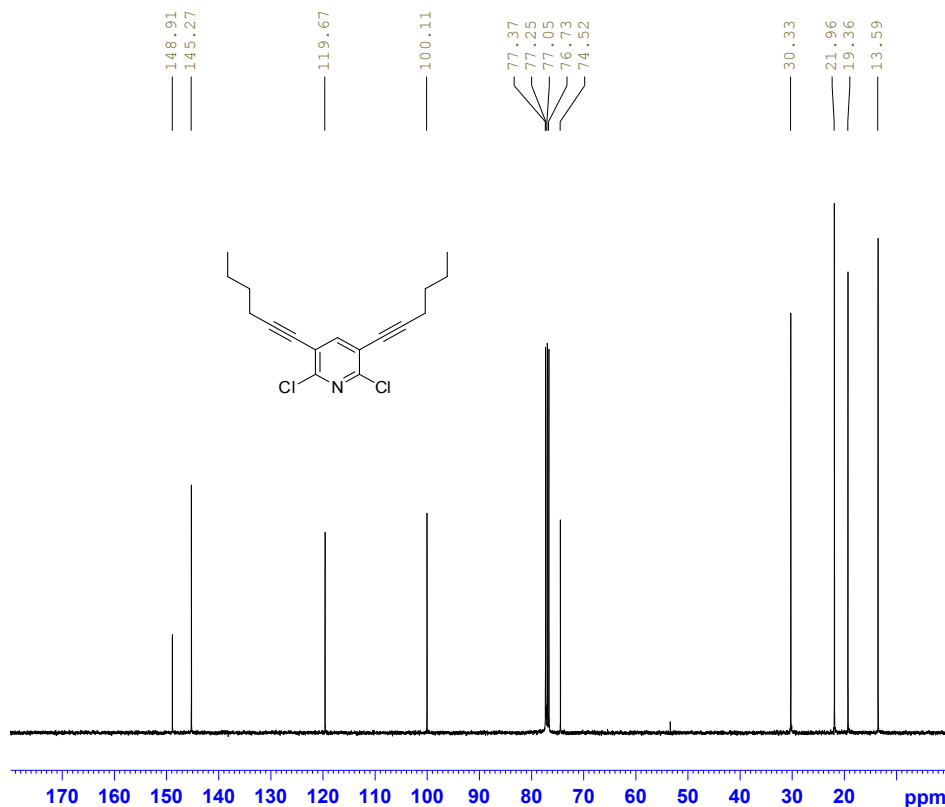

Current Data Parameters  
NAME SRE 842 13 C  
EXPNO 11  
PROCNO 1

F2 - Acquisition Parameters  
Date\_ 20120629  
Time\_ 1.44  
INSTRUM AV400  
PROBHD 5 mm QNP 1H/29  
PULPROG zgpg30  
TD 65536  
SOLVENT CDCl3  
NS 2000  
DS 4  
SWH 29940.119 Hz  
FIDRES 0.456850 Hz  
AQ 1.0945013 sec  
RG 13004  
DW 16.700 usec  
DE 6.00 usec  
TE 297.0 K  
D1 1.70000005 sec  
d11 0.03000000 sec  
DELTA 1.60000002 sec  
TD0 1

===== CHANNEL f1 =====  
NUC1 13C  
P1 10.00 usec  
PL1 -1.00 dB  
SFO1 100.6260690 MHz

===== CHANNEL f2 =====  
CPDPRG2 waltz16  
NUC2 1H  
PCPD2 100.00 usec  
PL2 -1.00 dB  
PL12 19.00 dB  
PL13 21.00 dB  
SFO2 400.1318000 MHz

F2 - Processing parameters  
SI 32768  
SF 100.6127737 MHz  
WDW EM  
SSB 0  
LB 1.00 Hz  
GB 0  
PC 1.00

# <sup>1</sup>H- and <sup>13</sup>C-NMR Spectra of compounds 5a-e

Reimann/ SRE 882  
AulH CDCl3 /opt/topspin 1208 47

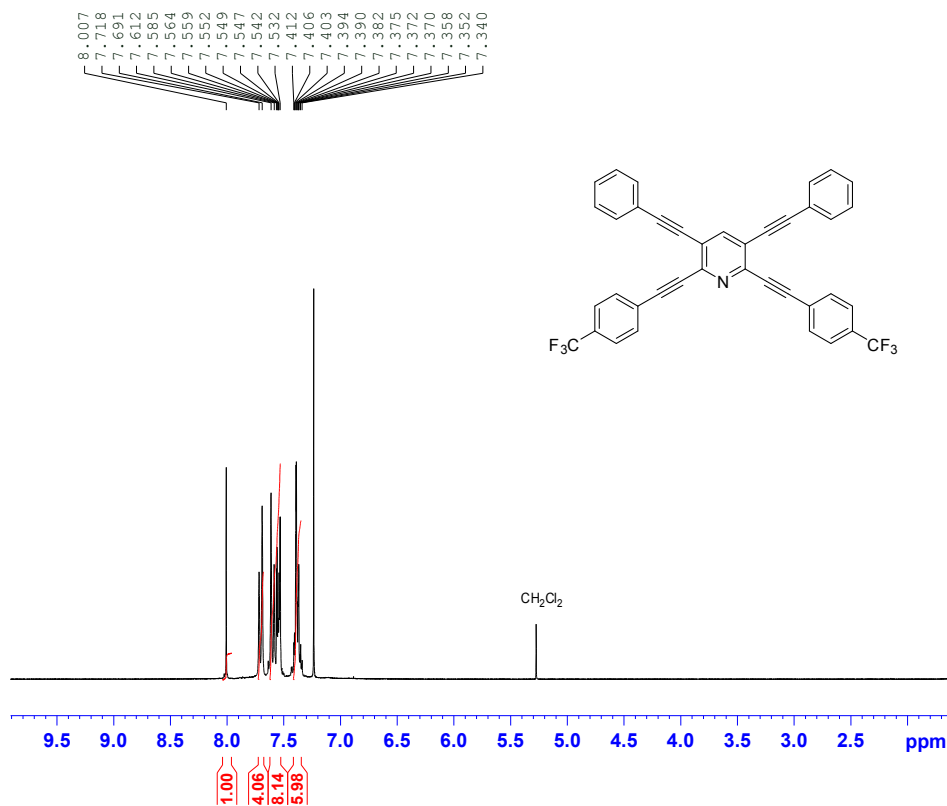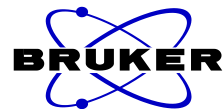

Current Data Parameters  
NAME SRE 882 1H  
EXPNO 10  
PROCNO 1

F2 - Acquisition Parameters  
Date\_ 20120811  
Time\_ 9.33  
INSTRUM AV300  
PROBHD 5 mm PABBO BB-  
PULPROG zg30  
TD 32768  
SOLVENT CDCl3  
NS 32  
DS 4  
SWH 6172.839 Hz  
FIDRES 0.188380 Hz  
AQ 2.6542580 sec  
RG 512  
DW 81.000 usec  
DE 6.00 usec  
TE 295.6 K  
D1 1.00000000 sec  
TD0 1

===== CHANNEL f1 =====  
NUC1 1H  
P1 11.00 usec  
PL1 0.00 dB  
SF01 300.1318534 MHz

F2 - Processing parameters  
SI 32768  
SF 300.1300222 MHz  
WDW EM  
SSB 0  
LB 0.10 Hz  
GB 0  
PC 1.00

Reimann/ SRE 882  
Aul13C CDCl3 /opt/topspin 1208 47

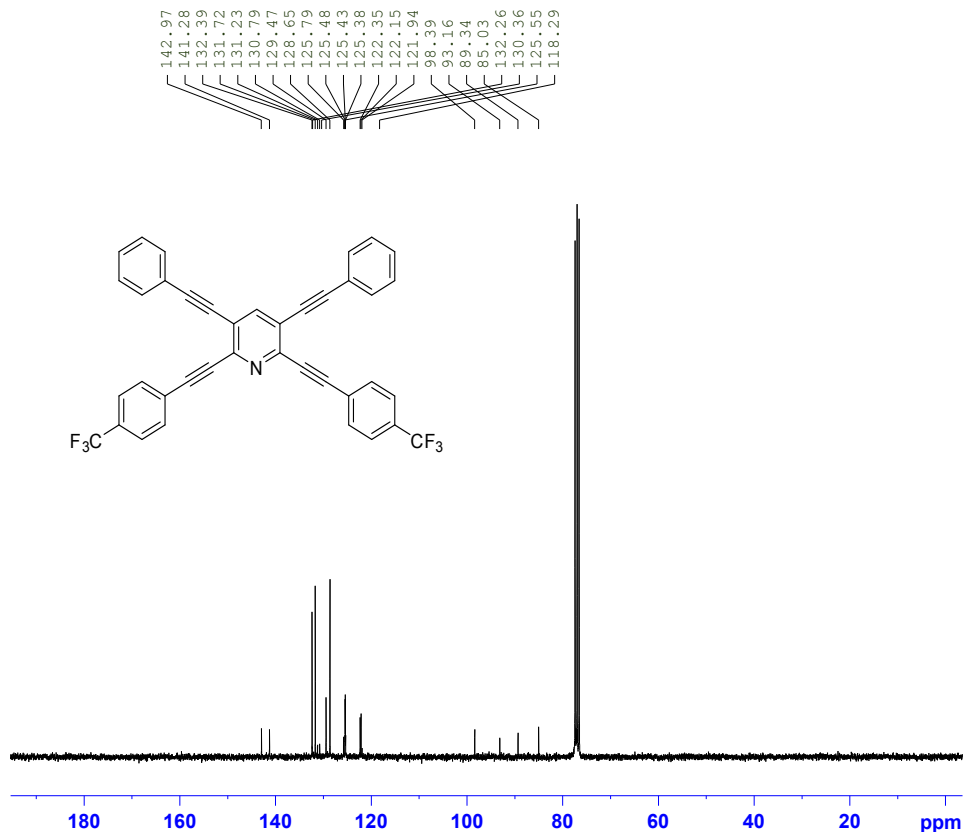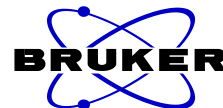

Current Data Parameters  
NAME SRE 882 13C  
EXPNO 11  
PROCNO 1

F2 - Acquisition Parameters  
Date\_ 20120811  
Time\_ 11.09  
INSTRUM AV300  
PROBHD 5 mm PABBO BB-  
PULPROG zgpg30  
TD 32768  
SOLVENT CDCl3  
NS 2000  
DS 4  
SWH 21097.047 Hz  
FIDRES 0.648331 Hz  
AQ 0.7766516 sec  
RG 32768  
DW 23.700 usec  
DE 6.00 usec  
TE 296.5 K  
D1 2.00000000 sec  
d11 0.03000000 sec  
DELTA 1.89999998 sec  
TD0 1

===== CHANNEL f1 =====  
NUC1 13C  
P1 9.60 usec  
PL1 -1.10 dB  
SF01 75.4771825 MHz

===== CHANNEL f2 =====  
CPDPRG2 waltz16  
NUC2 1H  
PCPD2 100.00 usec  
PL2 0.00 dB  
PL12 19.00 dB  
PL13 21.00 dB  
SF02 300.1312005 MHz

F2 - Processing parameters  
SI 32768  
SF 75.4677529 MHz  
WDW EM  
SSB 0  
LB 1.00 Hz  
GB 0  
PC 1.40

Reimann/ SRE 883  
AulH CDCl3 /opt/topspin 1208 48

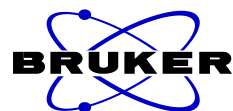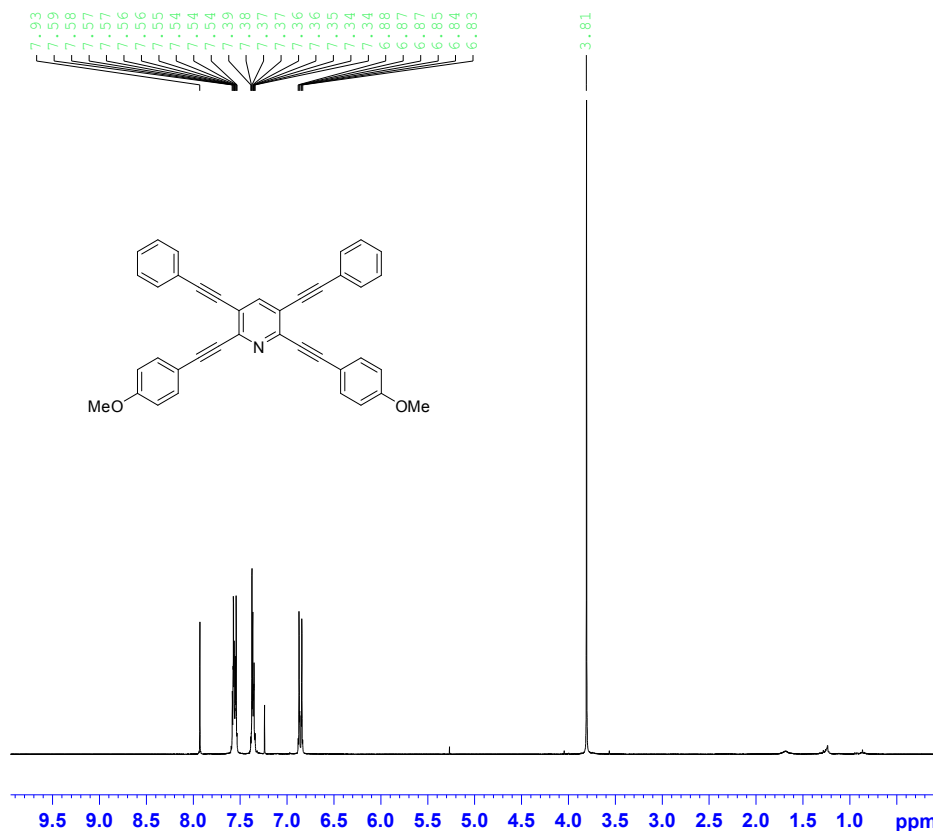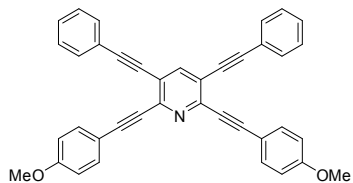

Current Data Parameters  
NAME SRE 883 1H  
EXPNO 10  
PROCNO 1

F2 - Acquisition Parameters  
Date\_ 20120811  
Time\_ 11.34  
INSTRUM AV300  
PROBHD 5 mm PABBO BB-  
PULPROG zg30  
TD 32768  
SOLVENT CDCl3  
NS 32  
DS 4  
SWH 6172.839 Hz  
FIDRES 0.188380 Hz  
AQ 2.6542580 sec  
RG 143.7  
DW 81.000 usec  
DE 6.00 usec  
TE 295.9 K  
D1 1.0000000 sec  
TD0 1

===== CHANNEL f1 =====  
NUC1 1H  
P1 11.00 usec  
PL1 0.00 dB  
SF01 300.1318534 MHz

F2 - Processing parameters  
SI 32768  
SF 300.1300215 MHz  
WDW EM  
SSB 0  
LB 0.10 Hz  
GB 0  
PC 1.00

Reimann/ SRE 883  
Aul3C CDCl3 /opt/topspin 1208 48

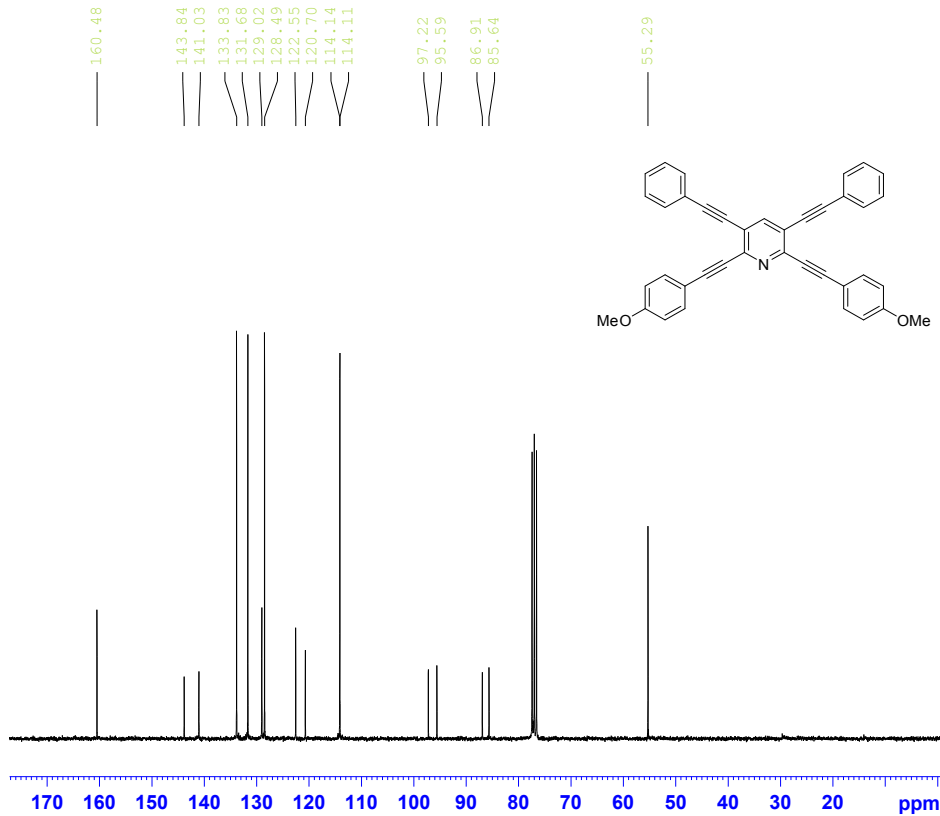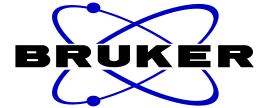

Current Data Parameters  
NAME SRE 883 13C  
EXPNO 11  
PROCNO 1

F2 - Acquisition Parameters  
Date\_ 20120811  
Time\_ 13.10  
INSTRUM AV300  
PROBHD 5 mm PABBO BB-  
PULPROG zgpg30  
TD 32768  
SOLVENT CDCl3  
NS 2000  
DS 4  
SWH 21097.047 Hz  
FIDRES 0.643831 Hz  
AQ 0.7766516 sec  
RG 32768  
DW 23.700 usec  
DE 6.00 usec  
TE 296.6 K  
D1 2.00000000 sec  
d11 0.03000000 sec  
DELTA 1.89999998 sec  
TDO 1

==== CHANNEL f1 =====  
NUC1 13C  
P1 9.60 usec  
PL1 -1.10 dB  
SFO1 75.4771825 MHz

==== CHANNEL f2 =====  
CPDPRG2 waltz16  
NUC2 1H  
PCPD2 100.00 usec  
PL2 0.00 dB  
PL12 19.00 dB  
PL13 21.00 dB  
SFO2 300.1312005 MHz

F2 - Processing parameters  
SI 32768  
SF 75.4677565 MHz  
WDW EM  
SSB 0  
LB 1.00 Hz  
GB 0  
PC 1.40

Reimann/ SRE 887  
AulH CDCl3 /opt/topspin 1208 50

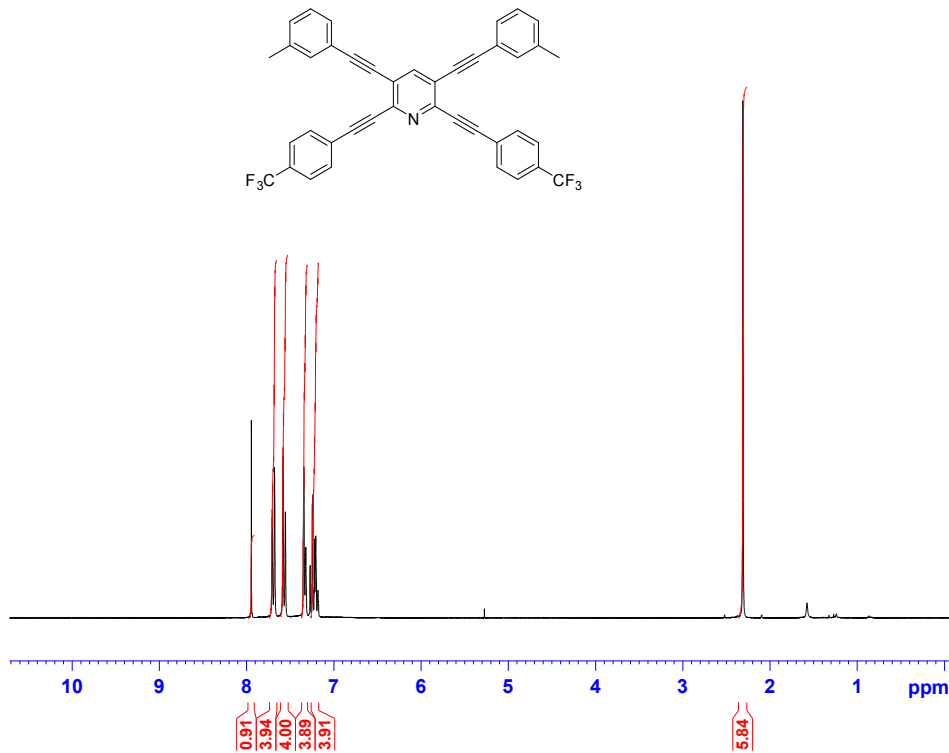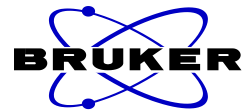

Current Data Parameters  
NAME SRE 887 1H  
EXPNO 10  
PROCNO 1

F2 - Acquisition Parameters  
Date\_ 20120811  
Time\_ 14.33  
INSTRUM AV300  
PROBHD 5 mm PABBO BB-  
PULPROG zg30  
TD 32768  
SOLVENT CDCl3  
NS 32  
DS 4  
SWH 6172.839 Hz  
FIDRES 0.188380 Hz  
AQ 2.6542580 sec  
RG 322.5  
DW 81.000 usec  
DE 6.00 usec  
TE 296.0 K  
D1 1.00000000 sec  
TDO 1

==== CHANNEL f1 =====  
NUC1 1H  
P1 11.00 usec  
PL1 0.00 dB  
SFO1 300.1318534 MHz

F2 - Processing parameters  
SI 32768  
SF 300.1300214 MHz  
WDW EM  
SSB 0  
LB 0.10 Hz  
GB 0  
PC 1.00

Reimann/ SRE 887  
 Aul3C CDC13 /opt/topspin 1208 50

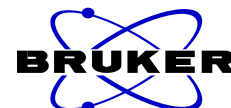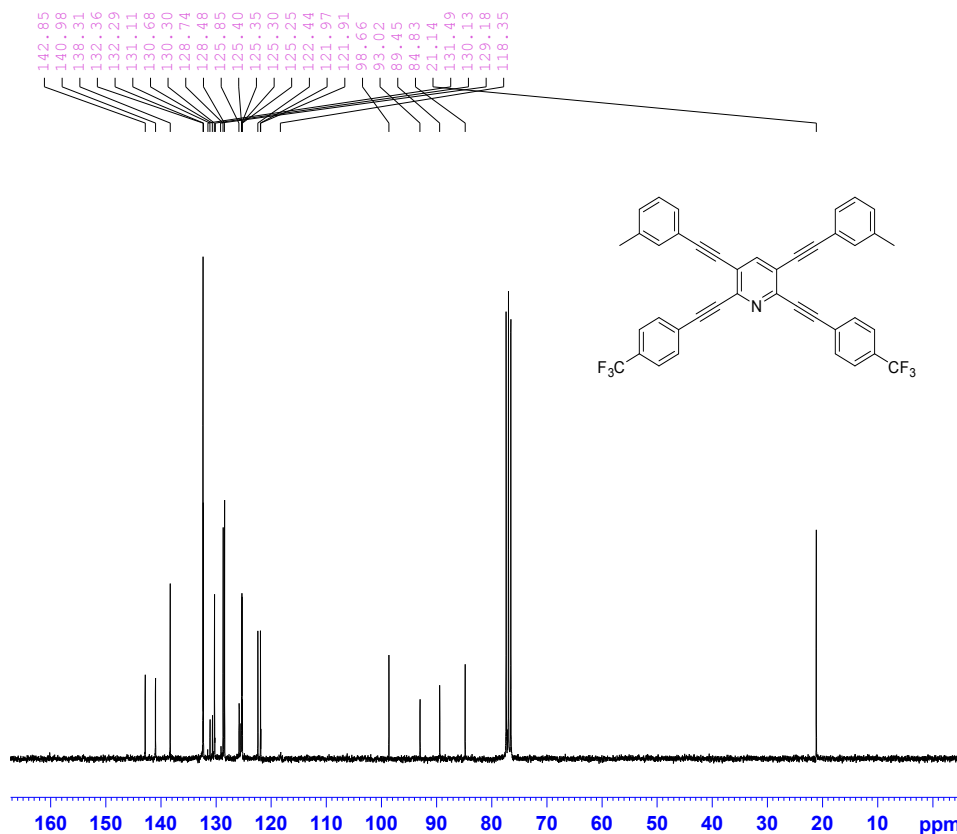

Current Data Parameters  
 NAME SRE 887 13C  
 EXPNO 11  
 PROCNO 1

F2 - Acquisition Parameters  
 Date\_ 20120811  
 Time\_ 16.09  
 INSTRUM AV300  
 PROBHD 5 mm PABBO BB-  
 PULPROG zgpg30  
 TD 32768  
 SOLVENT CDC13  
 NS 2000  
 DS 4  
 SWH 21097.047 Hz  
 FIDRES 0.643831 Hz  
 AQ 0.7766516 sec  
 RG 32768  
 DW 23.700 usec  
 DE 6.00 usec  
 TE 296.5 K  
 D1 2.00000000 sec  
 d11 0.03000000 sec  
 DELTA 1.89999998 sec  
 TD0 1

===== CHANNEL f1 =====  
 NUC1 13C  
 P1 9.60 usec  
 PL1 -1.10 dB  
 SFO1 75.4771825 MHz

===== CHANNEL f2 =====  
 CPDPRG2 waltz16  
 NUC2 1H  
 PCPD2 100.00 usec  
 PL2 0.00 dB  
 PL12 19.00 dB  
 PL13 21.00 dB  
 SFO2 300.1312005 MHz

F2 - Processing parameters  
 SI 32768  
 SF 75.4677557 MHz  
 WDW EM  
 SSB 0  
 LB 1.00 Hz  
 GB 0  
 PC 1.40



Reimann/ SRE 888  
 Au1H CDC13 /opt/topspin 1208 51

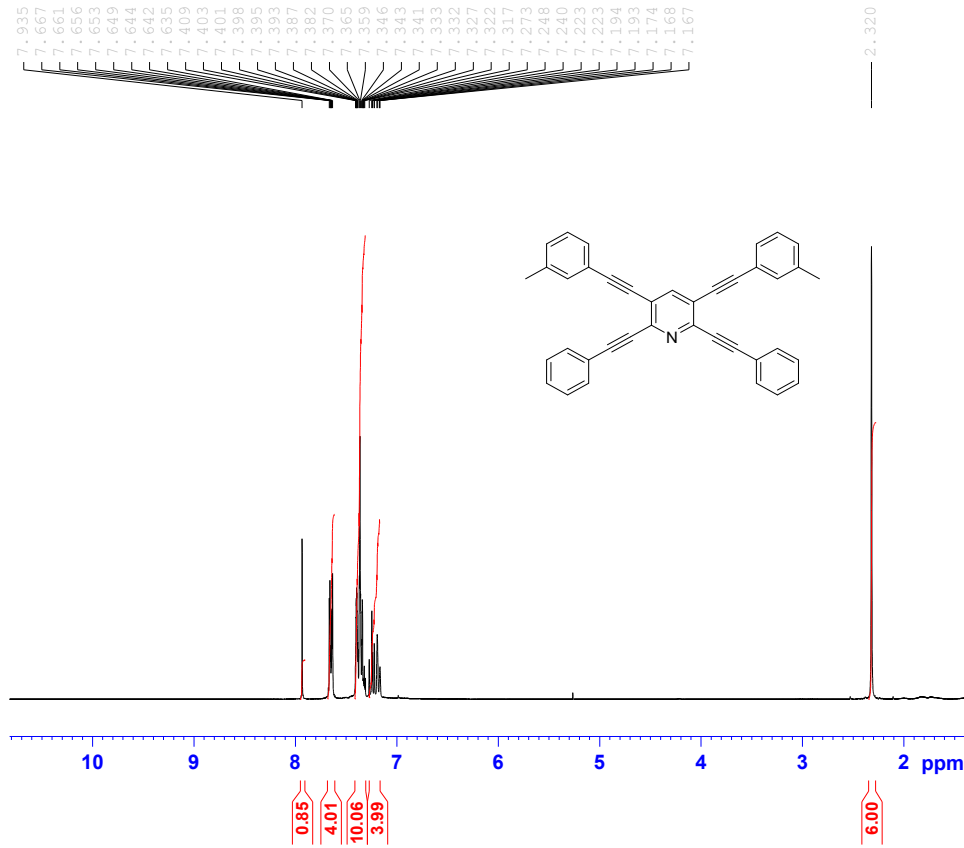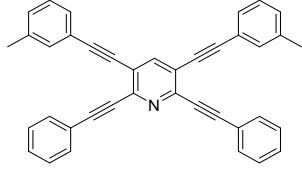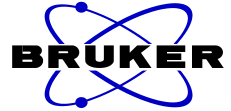

Current Data Parameters  
 NAME SRE 888 1H  
 EXPNO 10  
 PROCNO 1

F2 - Acquisition Parameters  
 Date\_ 20120811  
 Time 16.33  
 INSTRUM AV300  
 PROBHD 5 mm PABBO BB-  
 PULPROG zg30  
 TD 32768  
 SOLVENT CDC13  
 NS 32  
 DS 4  
 SWH 6172.839 Hz  
 FIDRES 0.188380 Hz  
 AQ 2.6542580 sec  
 RG 114  
 DW 81.000 usec  
 DE 6.00 usec  
 TE 295.9 K  
 D1 1.00000000 sec  
 TD0 1

==== CHANNEL f1 =====  
 NUC1 1H  
 P1 11.00 usec  
 PL1 0.00 dB  
 SFO1 300.1318534 MHz

F2 - Processing parameters  
 SI 32768  
 SF 300.1300216 MHz  
 WDW EM  
 SSB 0  
 LB 0.10 Hz  
 GB 0  
 PC 1.00

Reimann/ SRE 888  
 Au13C CDC13 /opt/topspin 1208 51

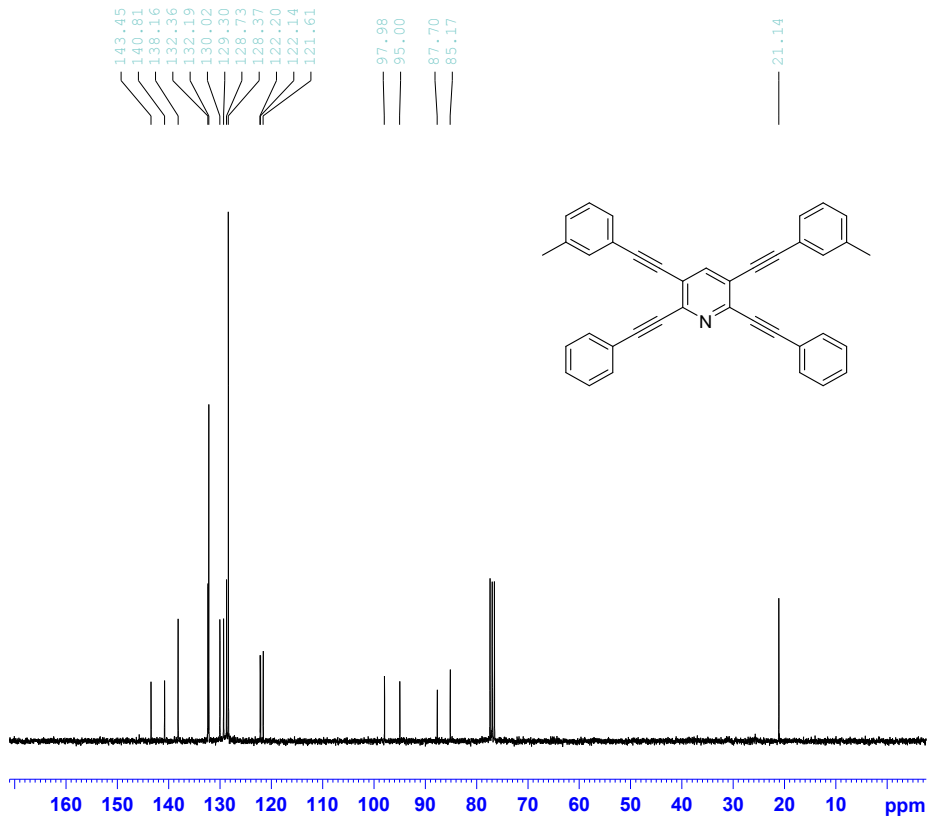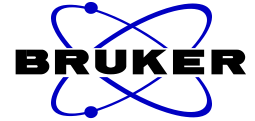

Current Data Parameters  
 NAME SRE 888 13C  
 EXPNO 11  
 PROCNO 1

F2 - Acquisition Parameters  
 Date\_ 20120811  
 Time 16.47  
 INSTRUM AV300  
 PROBHD 5 mm PABBO BB-  
 PULPROG zgpg30  
 TD 32768  
 SOLVENT CDC13  
 NS 256  
 DS 4  
 SWH 21097.047 Hz  
 FIDRES 0.643831 Hz  
 AQ 0.7766516 sec  
 RG 32768  
 DW 23.700 usec  
 DE 6.00 usec  
 TE 296.5 K  
 D1 2.00000000 sec  
 d11 0.03000000 sec  
 DELTA 1.89999998 sec  
 TD0 1

===== CHANNEL f1 =====  
 NUC1 13C  
 P1 9.60 usec  
 PL1 -1.10 dB  
 SFO1 75.4771825 MHz

===== CHANNEL f2 =====  
 CPDPRG2 waltz16  
 NUC2 1H  
 PCPD2 100.00 usec  
 PL2 0.00 dB  
 PL12 19.00 dB  
 FL13 21.00 dB  
 SFO2 300.1312005 MHz

F2 - Processing parameters  
 SI 32768  
 SF 75.4677586 MHz  
 WDW EM  
 SSB 0  
 LB 1.00 Hz  
 GB 0  
 PC 1.40

Reimann/ SRE 889  
 Au1H CDC13 /opt/topspin 1208 52

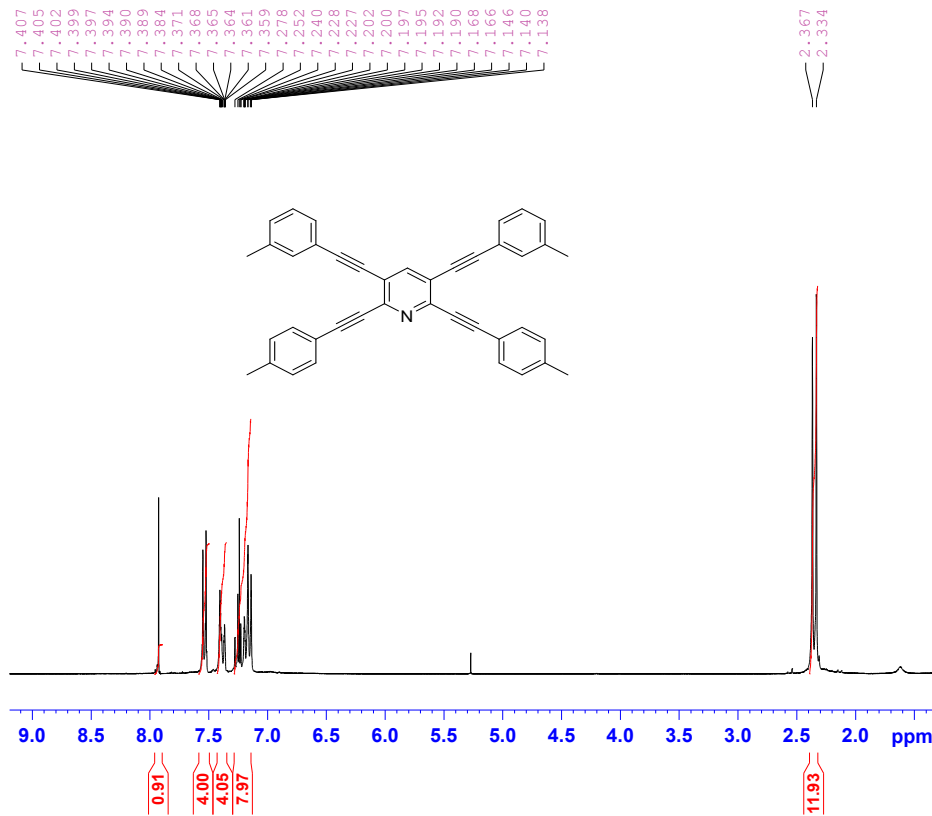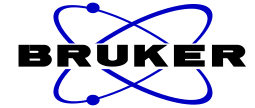

Current Data Parameters  
 NAME SRE 889 1H  
 EXPNO 10  
 PROCNO 1

F2 - Acquisition Parameters  
 Date\_ 20120811  
 Time 17.06  
 INSTRUM AV300  
 PROBHD 5 mm PABBO BB-  
 PULPROG zg30  
 TD 32768  
 SOLVENT CDC13  
 NS 32  
 DS 4  
 SWH 6172.839 Hz  
 FIDRES 0.188380 Hz  
 AQ 2.6542580 sec  
 RG 181  
 DW 81.000 usec  
 DE 6.00 usec  
 TE 295.9 K  
 D1 1.00000000 sec  
 TD0 1

===== CHANNEL f1 =====  
 NUC1 1H  
 P1 11.00 usec  
 PL1 0.00 dB  
 SFO1 300.1318534 MHz

F2 - Processing parameters  
 SI 32768  
 SF 300.1300216 MHz  
 WDW EM  
 SSB 0  
 LB 0.10 Hz  
 GB 0  
 PC 1.00

Reimann/ SRE 889  
Aul3C CDCl3 /opt/topspin 1208 52

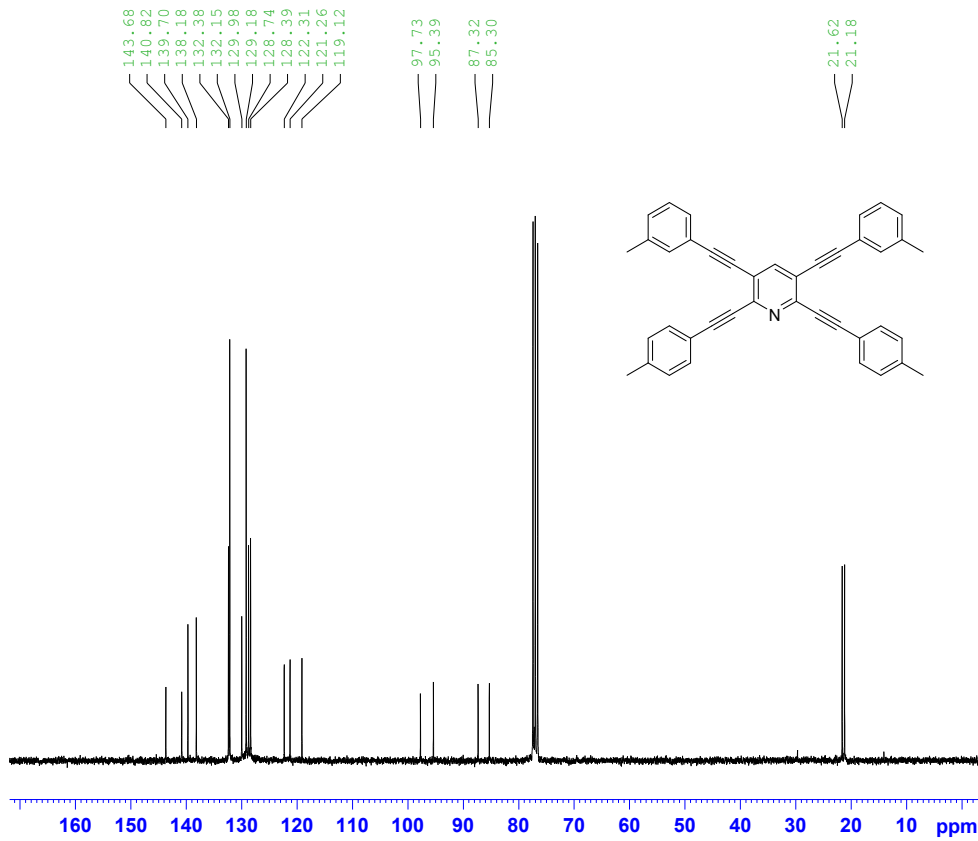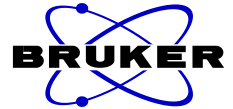

Current Data Parameters  
NAME SRE 889 13C  
EXPNO 11  
PROCNO 1

F2 - Acquisition Parameters  
Date\_ 20120811  
Time\_ 18.41  
INSTRUM AV300  
PROBHD 5 mm PABBO BB-  
PULPROG zgpg30  
TD 32768  
SOLVENT CDCl3  
NS 2000  
DS 4  
SWH 21097.047 Hz  
FIDRES 0.643831 Hz  
AQ 0.7766516 sec  
RG 32768  
DW 23.700 usec  
DE 6.00 usec  
TE 296.5 K  
D1 2.00000000 sec  
d11 0.03000000 sec  
DELTA 1.899999998 sec  
TD0 1

===== CHANNEL f1 =====  
NUC1 13C  
P1 9.60 usec  
PL1 -1.10 dB  
SFO1 75.4771825 MHz

===== CHANNEL f2 =====  
CPDPRG2 waltz16  
NUC2 1H  
PCPD2 100.00 usec  
PL2 0.00 dB  
PL12 19.00 dB  
PL13 21.00 dB  
SFO2 300.1312005 MHz

F2 - Processing parameters  
SI 32768  
SF 75.4677556 MHz  
WDW EM  
SSB 0  
LB 1.00 Hz  
GB 0  
PC 1.40

Reimann/ SRE 849  
AulH CDCl3 /opt/topspin 1207 31

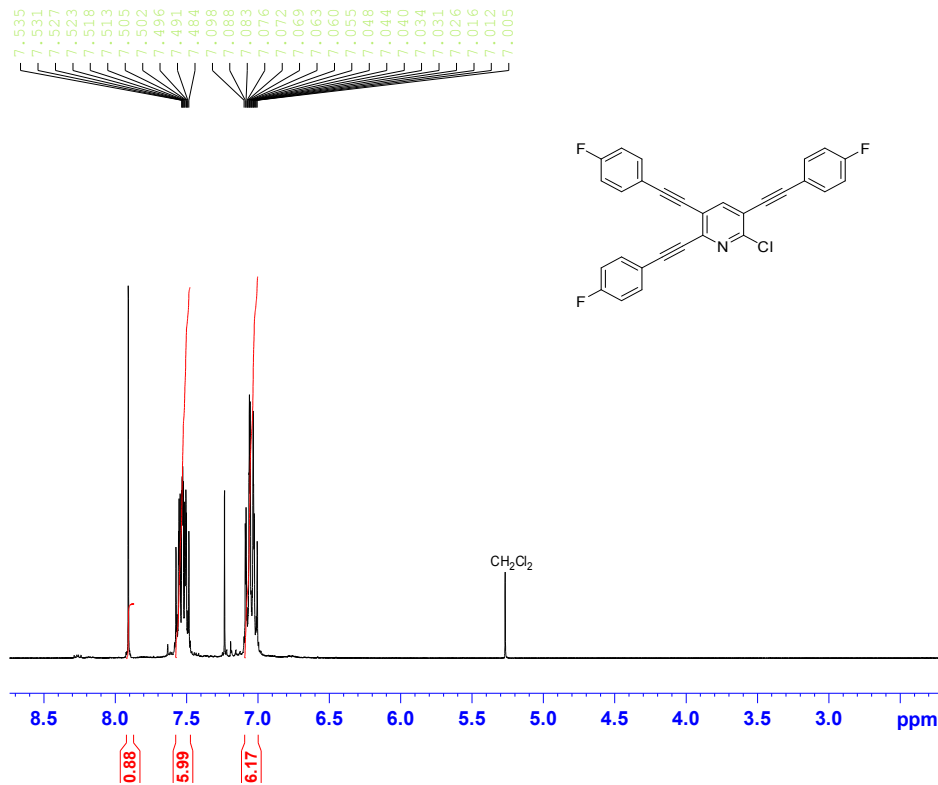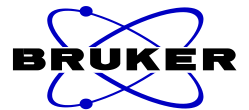

Current Data Parameters  
NAME SRE 849 1H  
EXPNO 10  
PROCNO 1

F2 - Acquisition Parameters  
Date\_ 20120705  
Time\_ 5.13  
INSTRUM AV300  
PROBHD 5 mm PABBO BB-  
PULPROG zg30  
TD 32768  
SOLVENT CDCl3  
NS 32  
DS 4  
SWH 6172.839 Hz  
FIDRES 0.188380 Hz  
AQ 2.6542580 sec  
RG 322.5  
DW 81.000 usec  
DE 6.00 usec  
TE 296.1 K  
D1 1.00000000 sec  
TD0 1

===== CHANNEL f1 =====  
NUC1 1H  
P1 11.00 usec  
PL1 0.00 dB  
SFO1 300.1318534 MHz

F2 - Processing parameters  
SI 32768  
SF 300.1300232 MHz  
WDW EM  
SSB 0  
LB 0.10 Hz  
GB 0  
PC 1.00

Reimann/ SRE 849  
Aul3C CDCl3 /opt/topspin 1207 31

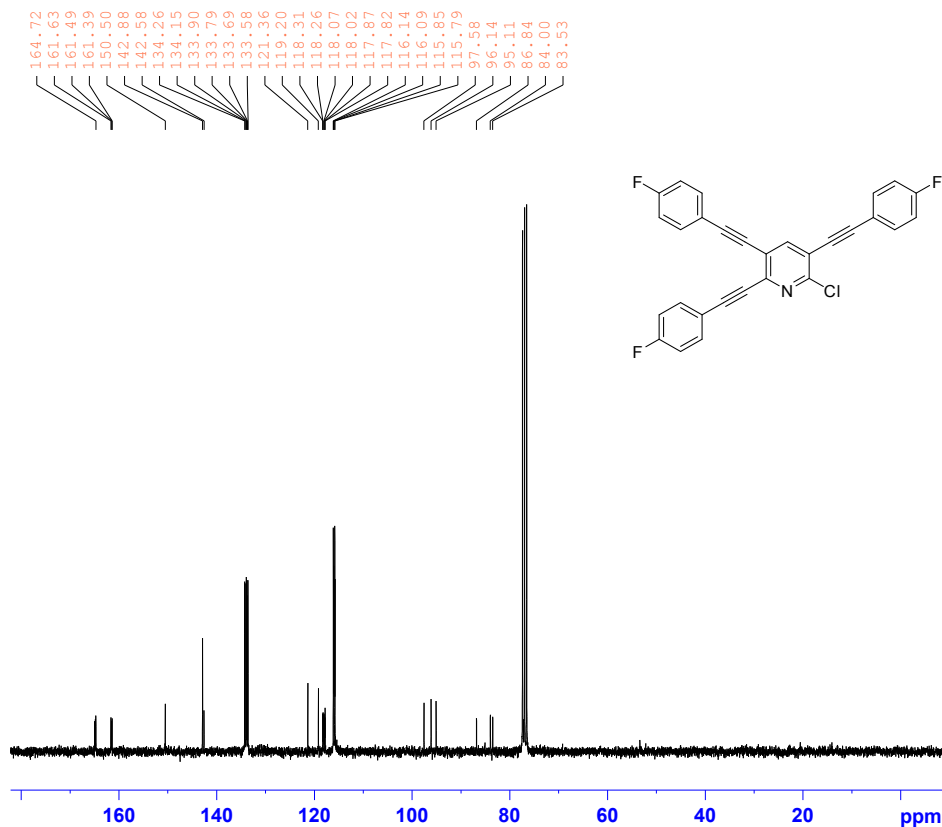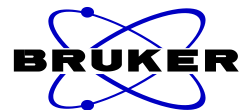

Current Data Parameters  
NAME SRE 849 13C  
EXPNO 13  
PROCNO 1

F2 - Acquisition Parameters  
Date\_ 20120705  
Time 6.16  
INSTRUM AV300  
PROBHD 5 mm PABBO BB-  
PULPROG zgpg30  
TD 32768  
SOLVENT CDCl3  
NS 1000  
DS 4  
SWH 21097.047 Hz  
FIDRES 0.643831 Hz  
AQ 0.7766516 sec  
RG 32768  
DW 23.700 usec  
DE 6.00 usec  
TE 296.5 K  
D1 2.0000000 sec  
d11 0.0300000 sec  
DELTA 1.89999998 sec  
TD0 1

===== CHANNEL f1 =====  
NUC1 13C  
P1 9.60 usec  
PL1 -1.10 dB  
SFO1 75.4771825 MHz

===== CHANNEL f2 =====  
CPDPRG2 waltz16  
NUC2 1H  
PCPD2 100.00 usec  
PL2 0.00 dB  
PL12 19.00 dB  
PL13 21.00 dB  
SFO2 300.1312005 MHz

F2 - Processing parameters  
SI 32768  
SF 75.4677546 MHz  
WDW EM  
SSB 0  
LB 1.00 Hz  
GB 0  
PC 1.40

# <sup>1</sup>H- and <sup>13</sup>C-NMR Spectra of compounds 6a-e

Reimann/ SRE 839  
Aul1H CDCl3 /opt/topspin 1206 5

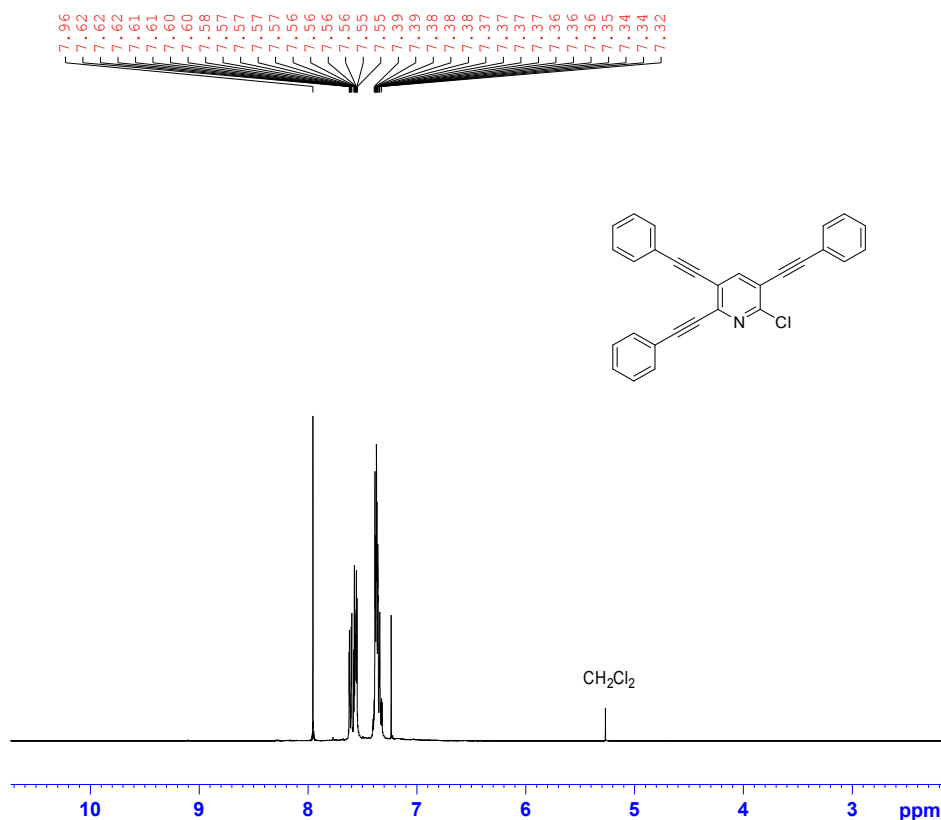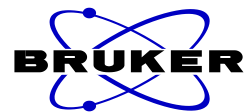

Current Data Parameters  
NAME SRE 839 1H  
EXPNO 10  
PROCNO 1

F2 - Acquisition Parameters  
Date\_ 20120628  
Time 17.22  
INSTRUM AV400  
PROBHD 5 mm QNP 1H/29  
PULPROG zg30  
TD 32768  
SOLVENT CDCl3  
NS 32  
DS 4  
SWH 8012.820 Hz  
FIDRES 0.244532 Hz  
AQ 2.0447731 sec  
RG 203.2  
DW 62.400 usec  
DE 6.00 usec  
TE 297.0 K  
D1 1.5000000 sec  
TD0 1

===== CHANNEL f1 =====  
NUC1 1H  
P1 12.20 usec  
PL1 -1.00 dB  
SFO1 400.1324000 MHz

F2 - Processing parameters  
SI 32768  
SF 400.1300309 MHz  
WDW EM  
SSB 0  
LB 0.10 Hz  
GB 0  
PC 1.00

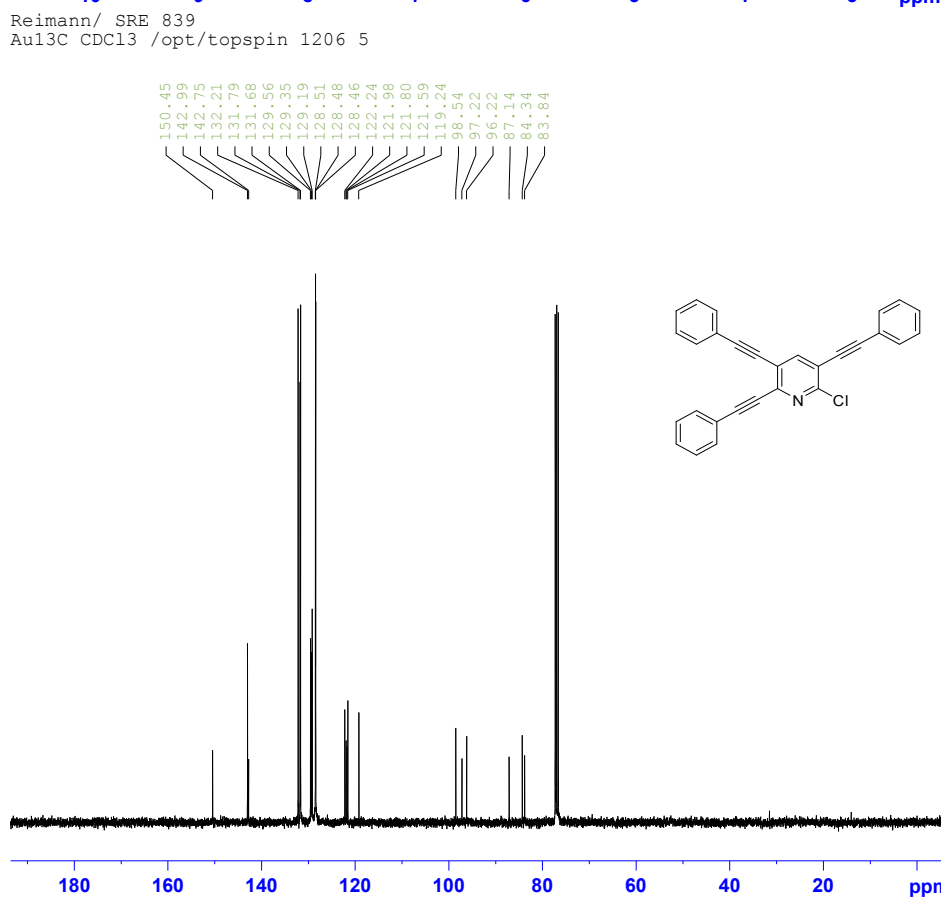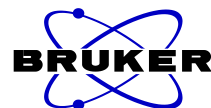

Current Data Parameters  
NAME SRE 839 13C  
EXPNO 11  
PROCNO 1

F2 - Acquisition Parameters  
Date\_ 20120628  
Time 17.47  
INSTRUM AV400  
PROBHD 5 mm QNP 1H/29  
PULPROG zgpg30  
TD 65536  
SOLVENT CDCl3  
NS 500  
DS 4  
SWH 29940.119 Hz  
FIDRES 0.456850 Hz  
AQ 1.0945013 sec  
RG 9195.2  
DW 16.700 usec  
DE 6.00 usec  
TE 297.0 K  
D1 1.70000005 sec  
d11 0.03000000 sec  
DELTA 1.60000002 sec  
TD0 1

===== CHANNEL f1 =====  
NUC1 13C  
P1 10.00 usec  
PL1 -1.00 dB  
SFO1 100.6260690 MHz

===== CHANNEL f2 =====  
CPDPRG2 waltz16  
NUC2 1H  
PCPD2 100.00 usec  
PL2 -1.00 dB  
PL12 19.00 dB  
PL13 21.00 dB  
SFO2 400.1318000 MHz

F2 - Processing parameters  
SI 32768  
SF 100.6127799 MHz  
WDW EM  
SSB 0  
LB 1.00 Hz  
GB 0  
PC 1.00

Reimann/ SRE 848  
 Au1H CDCl3 /opt/topspin 1207 2

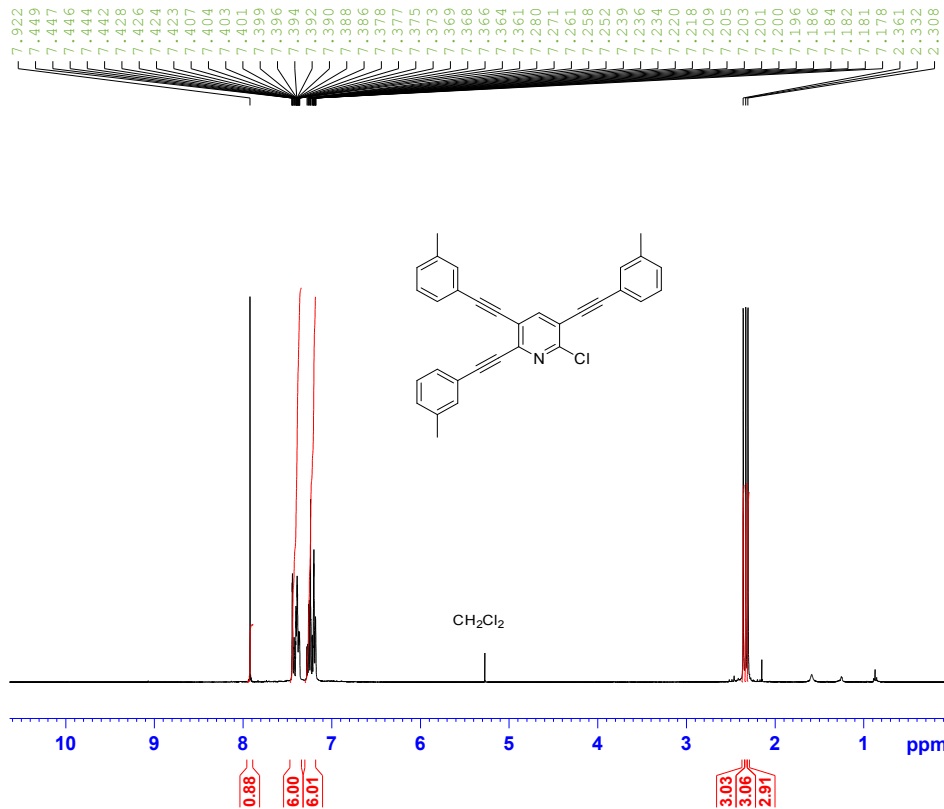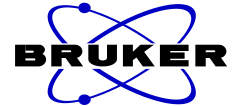

Current Data Parameters  
 NAME SRE 848 1H  
 EXNO 10  
 PROCNO 1

F2 - Acquisition Parameters  
 Date\_ 20120704  
 Time 16.08  
 INSTRUM AV400  
 PROBHD 5 mm QNP 1H/29  
 FULPROG zg30  
 TD 32768  
 SOLVENT CDCl3  
 NS 32  
 DS 4  
 SWH 8012.820 Hz  
 FIDRES 0.244532 Hz  
 AQ 2.0447731 sec  
 RG 143.7  
 DW 62.400 usec  
 DE 6.00 usec  
 TE 297.0 K  
 D1 1.50000000 sec  
 TD0 1

===== CHANNEL f1 =====  
 NUC1 1H  
 P1 12.20 usec  
 PL1 -1.00 dB  
 SFO1 400.1324000 MHz

F2 - Processing parameters  
 SI 32768  
 SF 400.1300298 MHz  
 WDW EM  
 SSB 0  
 LB 0.10 Hz  
 GB 0  
 PC 1.00

Reimann/ SRE 848  
 Au13C CDCl3 /opt/topspin 1207 2

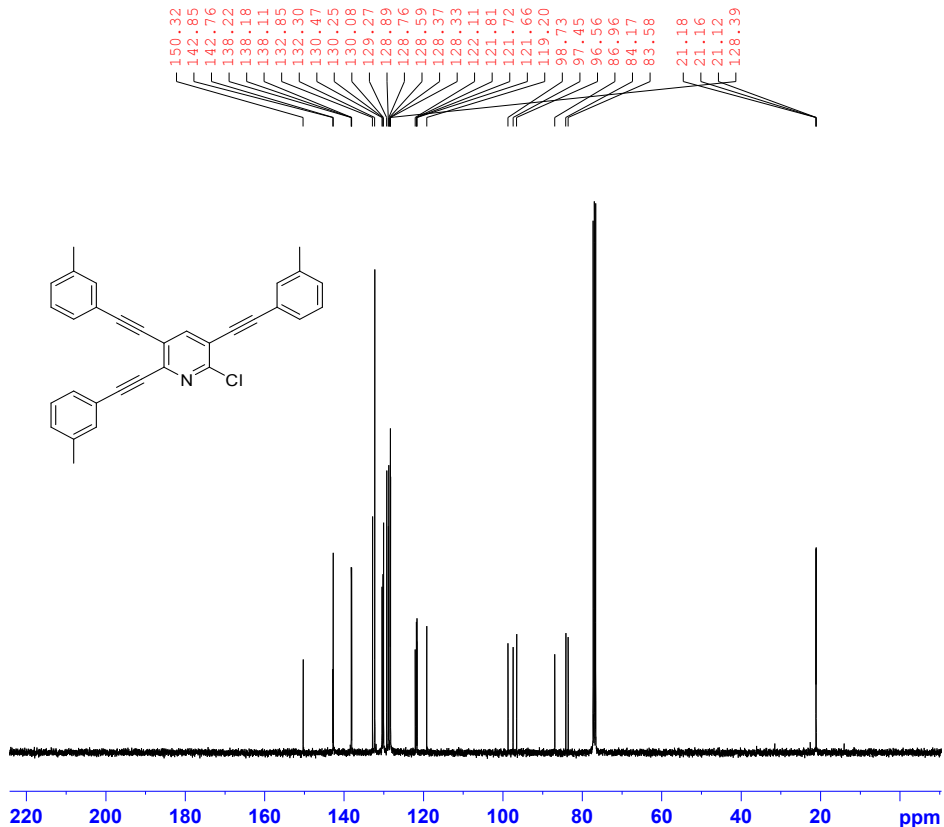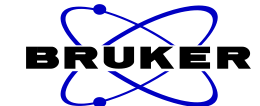

Current Data Parameters  
 NAME SRE 848 13C  
 EXFNO 11  
 PROCNO 1

F2 - Acquisition Parameters  
 Date\_ 20120704  
 Time 16.57  
 INSTRUM AV400  
 PROBHD 5 mm QNP 1H/29  
 FULPROG zgpg30  
 TD 65536  
 SOLVENT CDCl3  
 NS 1000  
 DS 4  
 SWH 29940.119 Hz  
 FIDRES 0.456850 Hz  
 AQ 1.0945013 sec  
 RG 11585.2  
 DW 16.700 usec  
 DE 6.00 usec  
 TE 297.0 K  
 D1 1.70000005 sec  
 d11 0.03000000 sec  
 DELTA 1.60000002 sec  
 TD0 1

===== CHANNEL f1 =====  
 NUC1 13C  
 P1 10.00 usec  
 PL1 -1.00 dB  
 SFO1 100.6260690 MHz

===== CHANNEL f2 =====  
 CPDPRG2 waltz16  
 NUC2 1H  
 PCPD2 100.00 usec  
 PL2 -1.00 dB  
 PL12 19.00 dB  
 PL13 21.00 dB  
 SFO2 400.1318000 MHz

F2 - Processing parameters  
 SI 32768  
 SF 100.6127800 MHz  
 WDW EM  
 SSB 0  
 LB 1.00 Hz  
 GB 0  
 PC 1.00

Reimann/ SRE 850  
 Au1H CDC13 /opt/topspin 1207 3

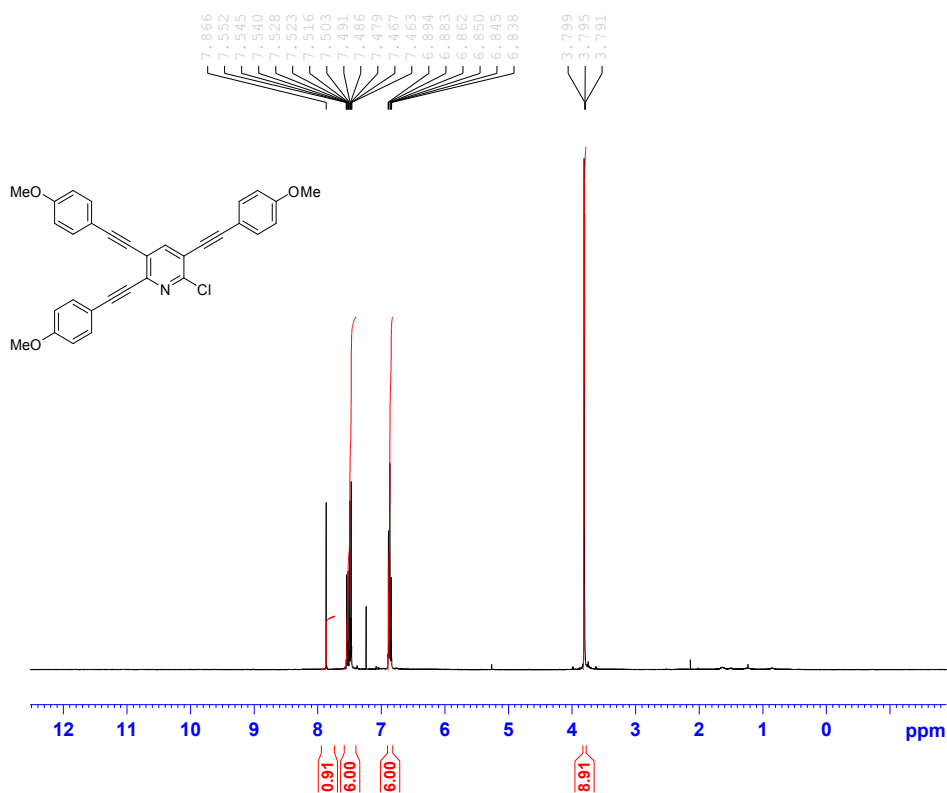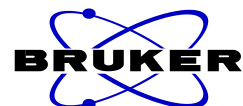

Current Data Parameters  
 NAME SRE 850 1H  
 EXPNO 10  
 PROCNO 1

F2 - Acquisition Parameters  
 Date\_ 20120704  
 Time 17.12  
 INSTRUM AV400  
 PROBHD 5 mm QNP 1H/29  
 PULPROG zg30  
 TD 32768  
 SOLVENT CDC13  
 NS 32  
 DS 4  
 SWH 8012.820 Hz  
 FIDRES 0.244532 Hz  
 AQ 2.0447731 sec  
 RG 143.7  
 DW 62.400 usec  
 DE 6.00 usec  
 TE 297.0 K  
 D1 1.5000000 sec  
 TD0 1

===== CHANNEL f1 =====  
 NUC1 1H  
 P1 12.20 usec  
 PL1 -1.00 dB  
 SFO1 400.1324000 MHz

F2 - Processing parameters  
 SI 32768  
 SF 400.1300300 MHz  
 WDW EM  
 SSB 0  
 LB 0.10 Hz  
 GB 0  
 PC 1.00

Reimann/ SRE 850  
 Au13C CDC13 /opt/topspin 1207 3

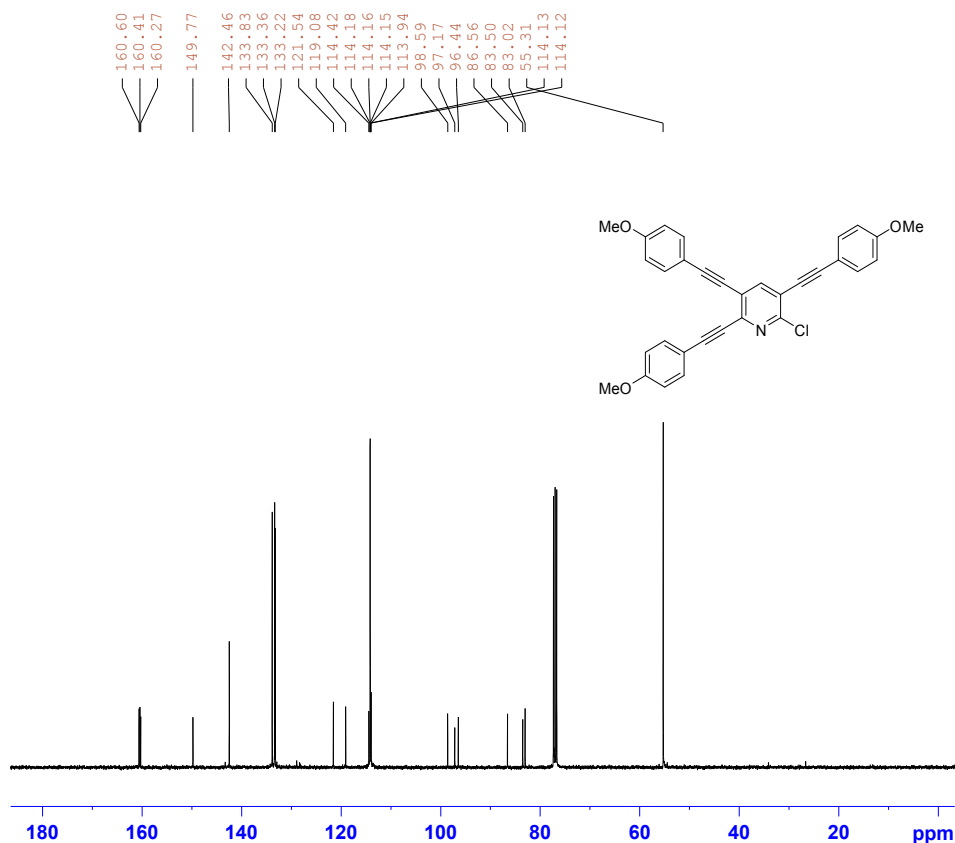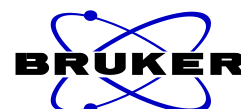

Current Data Parameters  
 NAME SRE 850 13C  
 EXPNO 11  
 PROCNO 1

F2 - Acquisition Parameters  
 Date\_ 20120704  
 Time 18.00  
 INSTRUM AV400  
 PROBHD 5 mm QNP 1H/29  
 PULPROG zgpg30  
 TD 65536  
 SOLVENT CDC13  
 NS 1000  
 DS 4  
 SWH 29940.119 Hz  
 FIDRES 0.456850 Hz  
 AQ 1.0945013 sec  
 RG 13004  
 DW 16.700 usec  
 DE 6.00 usec  
 TE 297.0 K  
 D1 1.70000005 sec  
 d11 0.03000000 sec  
 DELTA 1.60000002 sec  
 TD0 1

===== CHANNEL f1 =====  
 NUC1 13C  
 P1 10.00 usec  
 PL1 -1.00 dB  
 SFO1 100.6260690 MHz

===== CHANNEL f2 =====  
 CPDPRG2 waltz16  
 NUC2 1H  
 PCPD2 100.00 usec  
 PL2 -1.00 dB  
 PL12 19.00 dB  
 PL13 21.00 dB  
 SFO2 400.1318000 MHz

F2 - Processing parameters  
 SI 32768  
 SF 100.6127783 MHz  
 WDW EM  
 SSB 0  
 LB 1.00 Hz  
 GB 0  
 PC 1.00

Reimann/ SRE 847  
AulH CDC13 /opt/topspin 1207 5

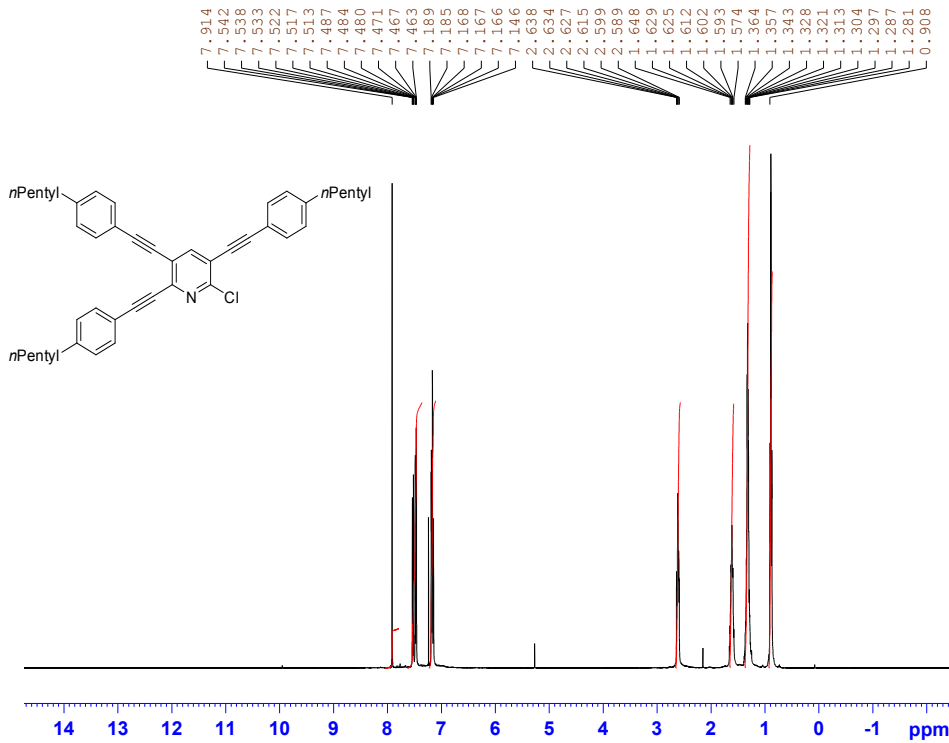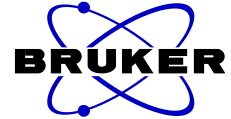

Current Data Parameters  
NAME SRE 847 1H  
EXPNO 10  
PROCNO 1

F2 - Acquisition Parameters  
Date\_ 20120704  
Time 19.19  
INSTRUM AV400  
PROBHD 5 mm QNP 1H/29  
PULPROG zg30  
TD 32768  
SOLVENT CDC13  
NS 32  
DS 4  
SWH 8012.820 Hz  
FIDRES 0.244532 Hz  
AQ 2.0447731 sec  
RG 71.8  
DW 62.400 usec  
DE 6.00 usec  
TE 297.0 K  
D1 1.5000000 sec  
TD0 1

===== CHANNEL f1 =====  
NUC1 1H  
P1 12.20 usec  
PL1 -1.00 dB  
SFO1 400.1324000 MHz

F2 - Processing parameters  
SI 32768  
SF 400.1300302 MHz  
WDW EM  
SSB 0  
LB 0.10 Hz  
GB 0  
PC 1.00

Reimann/ SRE 847  
Aul13C CDC13 /opt/topspin 1207 5

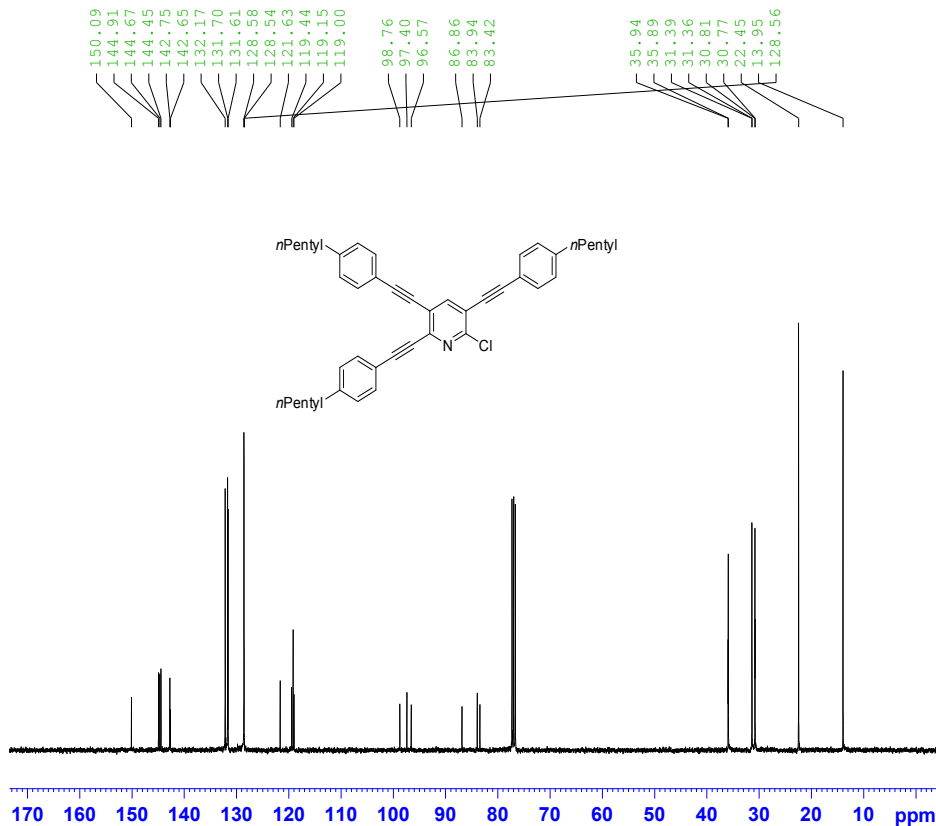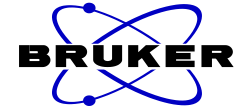

Current Data Parameters  
NAME SRE 847 13C  
EXPNO 11  
PROCNO 1

F2 - Acquisition Parameters  
Date\_ 20120704  
Time 19.43  
INSTRUM AV400  
PROBHD 5 mm QNP 1H/29  
PULPROG zgpg30  
TD 85536  
SOLVENT CDC13  
NS 500  
DS 4  
SWH 29940.119 Hz  
FIDRES 0.456850 Hz  
AQ 1.0945013 sec  
RG 13004  
DW 16.700 usec  
DE 6.00 usec  
TE 297.0 K  
D1 1.7000005 sec  
d11 0.0300000 sec  
DELTA 1.6000002 sec  
TD0 1

===== CHANNEL f1 =====  
NUC1 13C  
P1 10.00 usec  
PL1 -1.00 dB  
SFO1 100.6260690 MHz

===== CHANNEL f2 =====  
CPDPRG2 waltz16  
NUC2 1H  
PCPD2 100.00 usec  
PL2 -1.00 dB  
PL12 19.00 dB  
PL13 21.00 dB  
SFO2 400.1318000 MHz

F2 - Processing parameters  
SI 32768  
SF 100.6127813 MHz  
WDW EM  
SSB 0  
LB 1.00 Hz  
GB 0  
PC 1.00



Reimann/ SRE 844  
AulH CDC13 /opt/topspin 1207 1

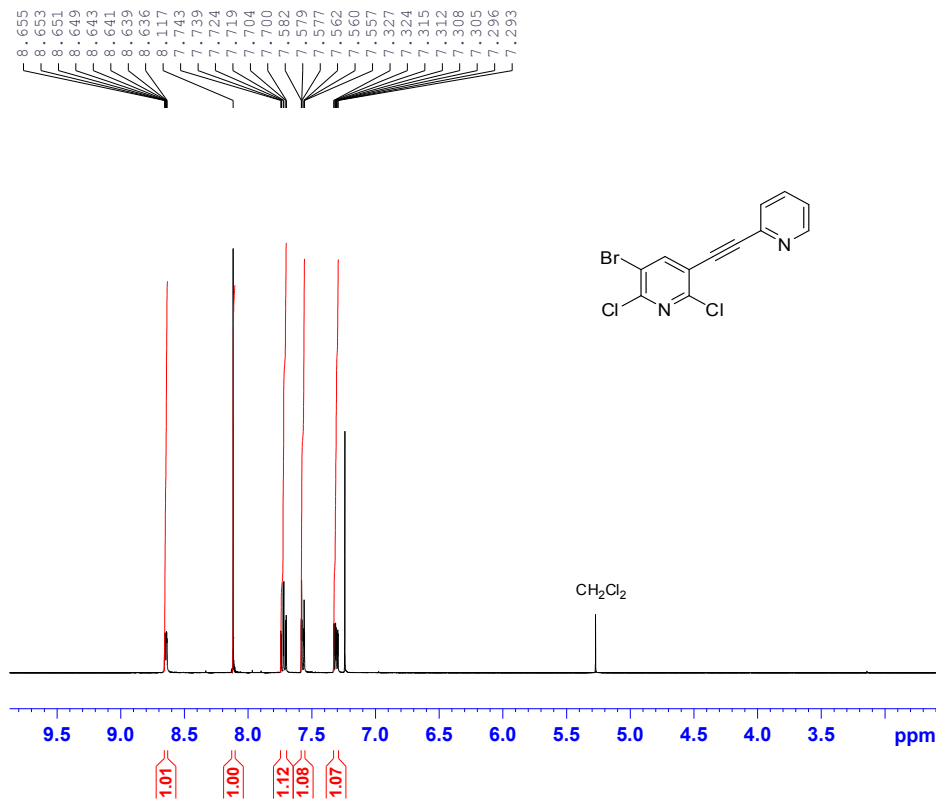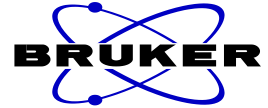

Current Data Parameters  
NAME SRE 844 1H  
EXPNO 10  
PROCNO 1

F2 - Acquisition Parameters  
Date\_ 20120704  
Time 15.05  
INSTRUM AV400  
PROBHD 5 mm QNP 1H/29  
PULPROG zg30  
TD 32768  
SOLVENT CDC13  
NS 32  
DS 4  
SWH 8012.820 Hz  
FIDRES 0.244532 Hz  
AQ 2.0447731 sec  
RG 512  
DW 62.400 usec  
DE 6.00 usec  
TE 297.0 K  
D1 1.50000000 sec  
TD0 1

===== CHANNEL f1 =====  
NUC1 1H  
P1 12.20 usec  
PL1 -1.00 dB  
SFO1 400.1324000 MHz

F2 - Processing parameters  
SI 32768  
SF 400.1300294 MHz  
WDW EM  
SSB 0  
LB 0.10 Hz  
GB 0  
PC 1.00

Reimann/ SRE 844  
Aul13C CDC13 /opt/topspin 1207 1

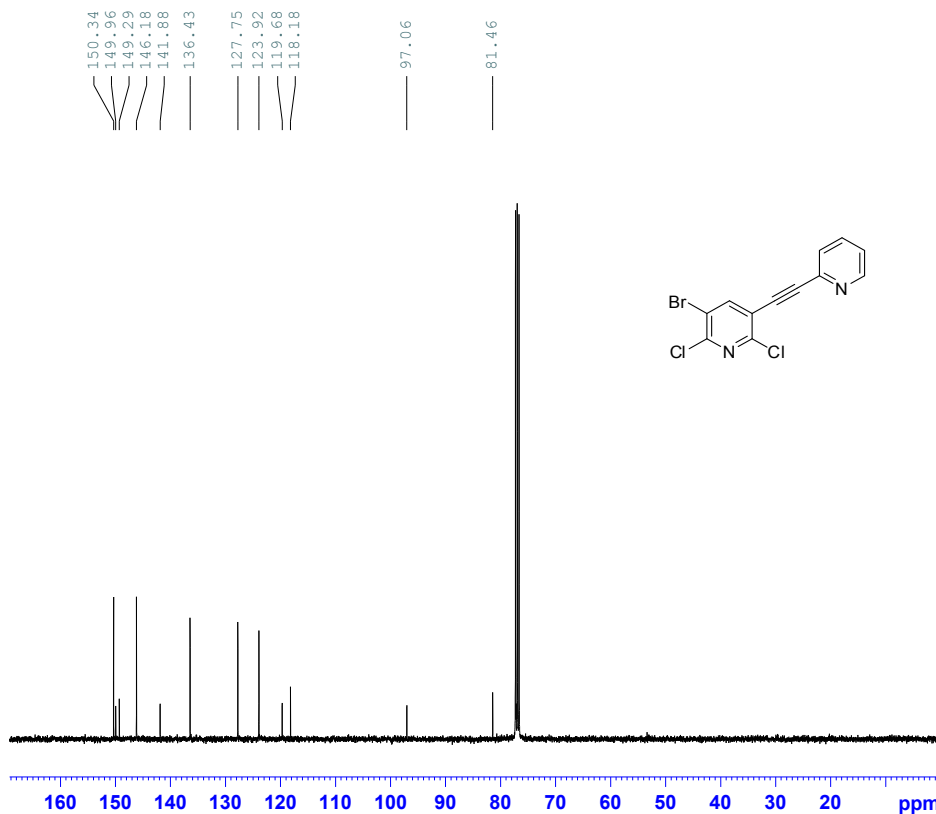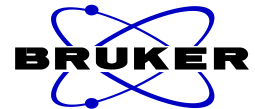

Current Data Parameters  
NAME SRE 840 13C  
EXPNO 11  
PROCNO 1

F2 - Acquisition Parameters  
Date\_ 20120704  
Time 15.53  
INSTRUM AV400  
PROBHD 5 mm QNP 1H/29  
PULPROG zgpg30  
TD 65536  
SOLVENT CDC13  
NS 1000  
DS 4  
SWH 29940.119 Hz  
FIDRES 0.456850 Hz  
AQ 1.0945013 sec  
RG 13004  
DW 16.700 usec  
DE 6.00 usec  
TE 297.0 K  
D1 1.70000005 sec  
d11 0.03000000 sec  
DELTA 1.60000002 sec  
TD0 1

===== CHANNEL f1 =====  
NUC1 13C  
P1 10.00 usec  
PL1 -1.00 dB  
SFO1 100.6260690 MHz

===== CHANNEL f2 =====  
CPDPRG2 waltz16  
NUC2 1H  
PCPD2 100.00 usec  
PL2 -1.00 dB  
PL12 19.00 dB  
PL13 21.00 dB  
SFO2 400.1318000 MHz

F2 - Processing parameters  
SI 32768  
SF 100.6127759 MHz  
WDW EM  
SSB 0  
LB 1.00 Hz  
GB 0  
PC 1.00

# <sup>1</sup>H- and <sup>13</sup>C-NMR Spectra of Compounds 7a-e

Reimann/ SRE 840  
AulH CDCl3 /opt/topspin 1206 6

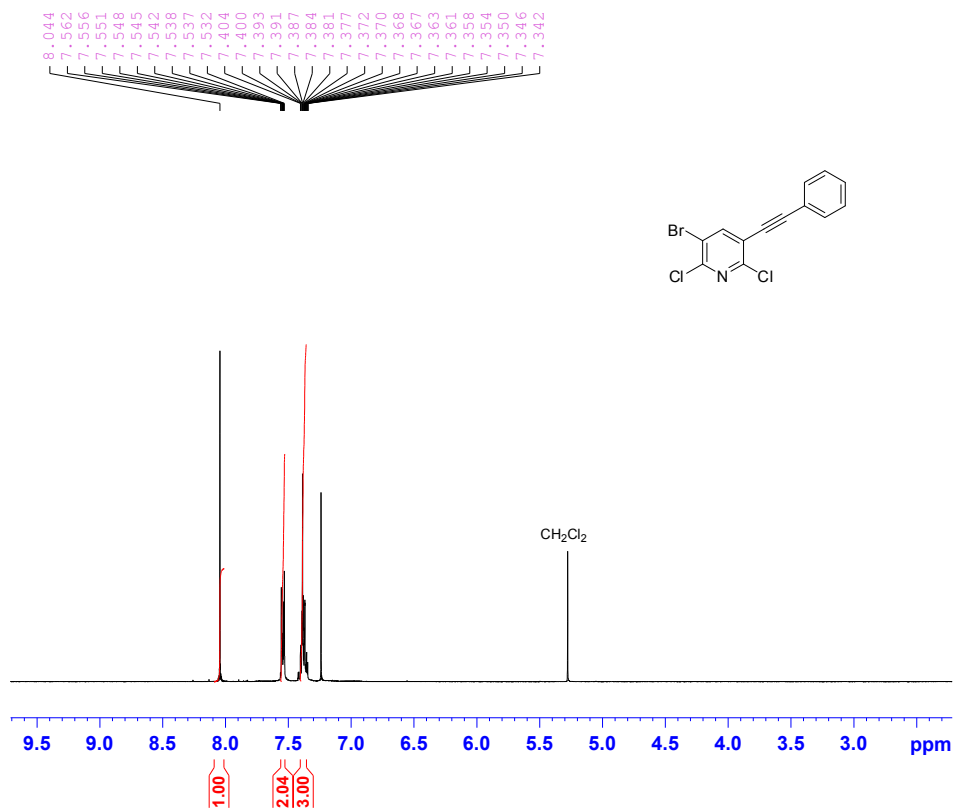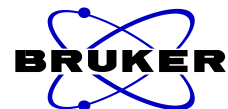

Current Data Parameters  
NAME SRE 840 1H  
EXNO 10  
PROCNO 1

F2 - Acquisition Parameters  
Date\_ 20120628  
Time 18.02  
INSTRUM AV400  
PROBHD 5 mm QNP 1H/29  
PULPROG zg30  
TD 32768  
SOLVENT CDCl3  
NS 32  
DS 4  
SWH 8012.820 Hz  
FIDRES 0.244532 Hz  
AQ 2.0447731 sec  
RG 512  
DW 62.400 usec  
DE 6.00 usec  
TE 297.0 K  
D1 1.50000000 sec  
TDO 1

===== CHANNEL f1 =====  
NUC1 1H  
P1 12.20 usec  
PL1 -1.00 dB  
SFO1 400.1324000 MHz

F2 - Processing parameters  
SI 32768  
SF 400.1300297 MHz  
WDW EM  
SSB 0  
LB 0.10 Hz  
GB 0  
PC 1.00

Reimann/ SRE 840  
 Au13C CDCl3 /opt/topspin 1206 6

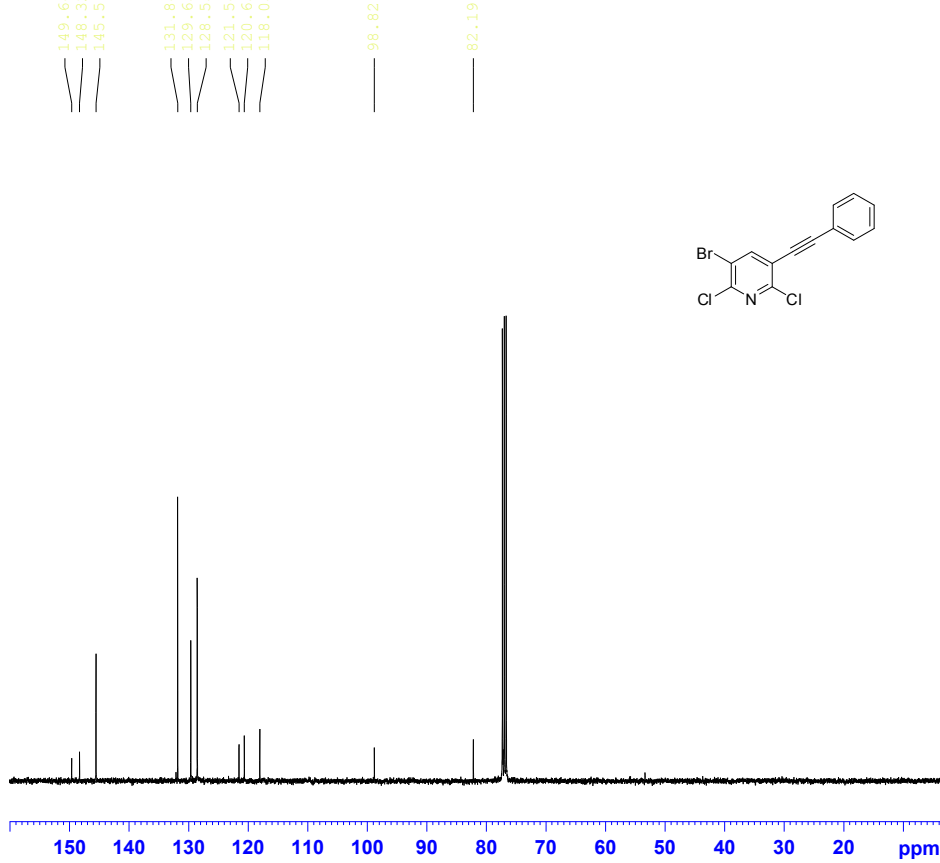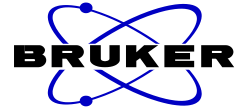

Current Data Parameters  
 NAME SRE 840 13C  
 EXPNO 11  
 PROCNO 1

F2 - Acquisition Parameters  
 Date\_ 20120628  
 Time\_ 18.51  
 INSTRUM AV400  
 PROBHD 5 mm QNP 1H/29  
 PULPROG zgpg30  
 TD 65536  
 SOLVENT CDCl3  
 NS 1000  
 DS 4  
 SWH 29940.119 Hz  
 FIDRES 0.456850 Hz  
 AQ 1.0945013 sec  
 RG 13004  
 DW 16.700 usec  
 DE 6.00 usec  
 TE 297.0 K  
 D1 1.70000005 sec  
 d11 0.03000000 sec  
 DELTA 1.60000002 sec  
 TDO 1

===== CHANNEL f1 =====  
 NUC1 13C  
 P1 10.00 usec  
 PL1 -1.00 dB  
 SFO1 100.6260690 MHz

===== CHANNEL f2 =====  
 CPDPRG2 waltz16  
 NUC2 1H  
 PCPD2 100.00 usec  
 PL2 -1.00 dB  
 PL12 19.00 dB  
 PL13 21.00 dB  
 SFO2 400.1318000 MHz

F2 - Processing parameters  
 SI 32768  
 SF 100.6127756 MHz  
 WDW EM  
 SSB 0  
 LB 1.00 Hz  
 GB 0  
 FC 1.00

Reimann/ SRE 851  
 Au1H CDCl3 /opt/topspin 1207 4

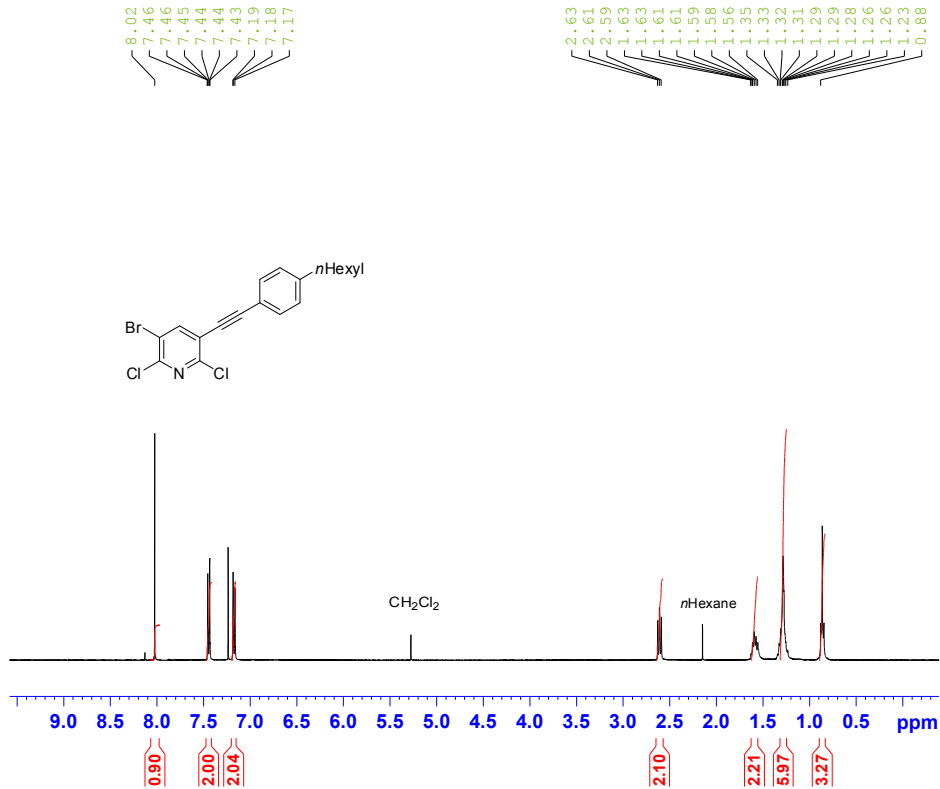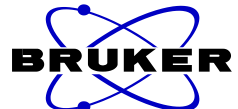

Current Data Parameters  
 NAME SRE 851 1H  
 EXPNO 10  
 PROCNO 1

F2 - Acquisition Parameters  
 Date\_ 20120704  
 Time\_ 18.15  
 INSTRUM AV400  
 PROBHD 5 mm QNP 1H/29  
 PULPROG zg30  
 TD 32768  
 SOLVENT CDCl3  
 NS 32  
 DS 4  
 SWH 8012.820 Hz  
 FIDRES 0.244532 Hz  
 AQ 2.0447731 sec  
 RG 256  
 DW 62.400 usec  
 DE 6.00 usec  
 TE 297.0 K  
 D1 1.50000000 sec  
 TDO 1

===== CHANNEL f1 =====  
 NUC1 1H  
 P1 12.20 usec  
 PL1 -1.00 dB  
 SFO1 400.1324000 MHz

F2 - Processing parameters  
 SI 32768  
 SF 400.1300300 MHz  
 WDW EM  
 SSB 0  
 LB 0.10 Hz  
 GB 0  
 PC 1.00

Reimann/ SRE 851  
 Aul3C CDC13 /opt/topspin 1207 4

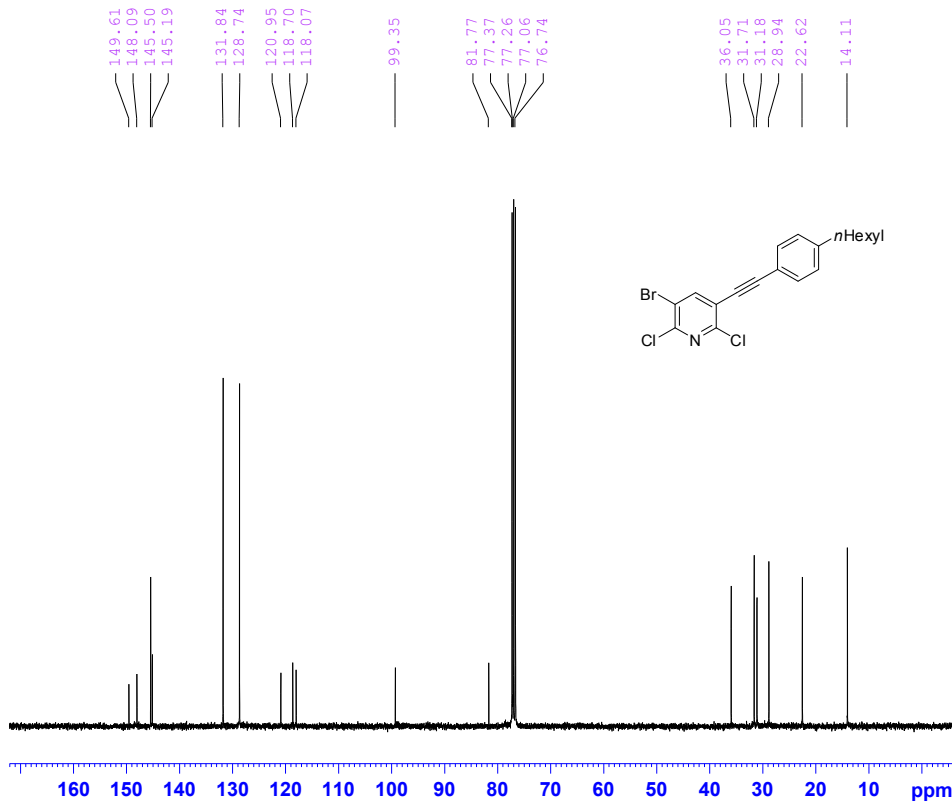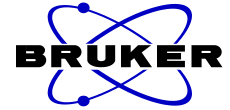

Current Data Parameters  
 NAME SRE 851 13C  
 EXPNO 11  
 PROCNO 1

F2 - Acquisition Parameters  
 Date\_ 20120704  
 Time 19.04  
 INSTRUM AV400  
 PROBHD 5 mm QNP 1H/29  
 PULPROG zgpg30  
 TD 65536  
 SOLVENT CDC13  
 NS 1000  
 DS 4  
 SWH 29940.119 Hz  
 FIDRES 0.456850 Hz  
 AQ 1.0945013 sec  
 RG 13004  
 DW 16.700 usec  
 DE 6.00 usec  
 TE 297.0 K  
 D1 1.70000005 sec  
 d11 0.03000000 sec  
 DELTA 1.60000002 sec  
 TD0 1

===== CHANNEL f1 =====  
 NUC1 13C  
 P1 10.00 usec  
 PL1 -1.00 dB  
 SFO1 100.6260690 MHz

===== CHANNEL f2 =====  
 CPDPRG2 waltz16  
 NUC2 1H  
 EPCD2 100.00 usec  
 PL2 -1.00 dB  
 PL12 19.00 dB  
 PL13 21.00 dB  
 SFO2 400.1318000 MHz

F2 - Processing parameters  
 SI 32768  
 SF 100.6127757 MHz  
 WDW EM  
 SSB 0  
 LB 1.00 Hz  
 GB 0  
 PC 1.00

Reimann, SRE 853  
 Aul1H CDC13 /opt/topspin 1207 22

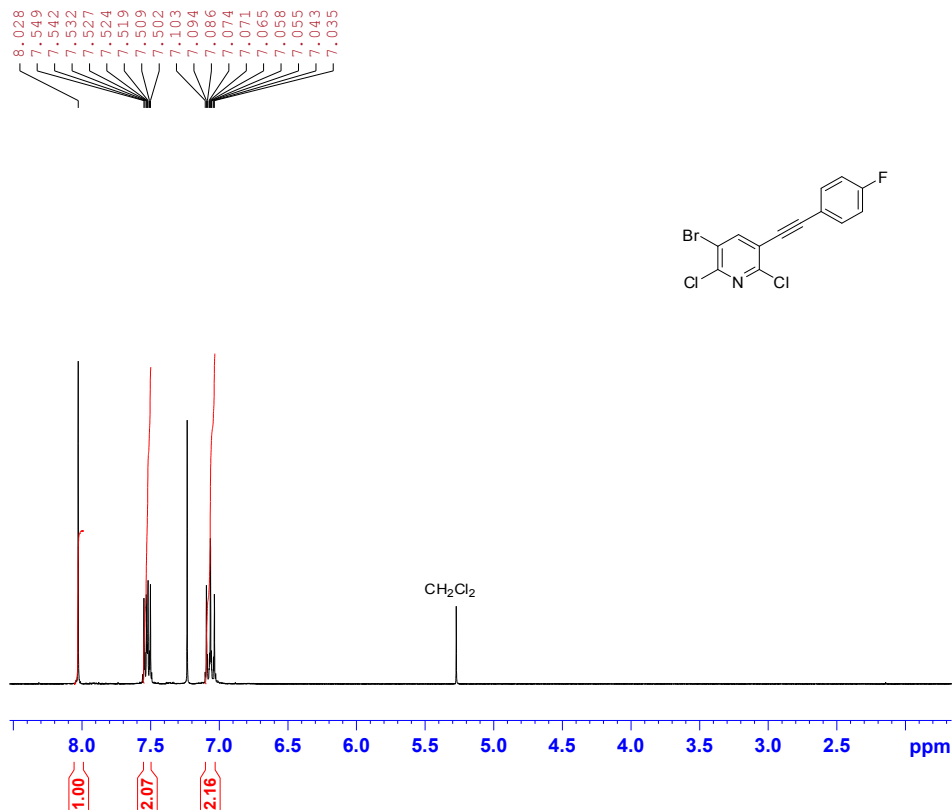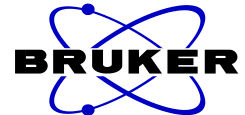

Current Data Parameters  
 NAME SRE 853 1H  
 EXPNO 10  
 PROCNO 1

F2 - Acquisition Parameters  
 Date\_ 20120713  
 Time 3.31  
 INSTRUM AV300  
 PROBHD 5 mm PABBO BB-  
 PULPROG zg30  
 TD 32768  
 SOLVENT CDC13  
 NS 32  
 DS 4  
 SWH 6172.839 Hz  
 FIDRES 0.188380 Hz  
 AQ 2.6542580 sec  
 RG 724.1  
 DW 81.000 usec  
 DE 6.00 usec  
 TE 296.0 K  
 D1 1.00000000 sec  
 TD0 1

===== CHANNEL f1 =====  
 NUC1 1H  
 P1 11.00 usec  
 PL1 0.00 dB  
 SFO1 300.1318534 MHz

F2 - Processing parameters  
 SI 32768  
 SF 300.1300233 MHz  
 WDW EM  
 SSB 0  
 LB 0.10 Hz  
 GB 0  
 PC 1.00

Reimann / SRE 853  
 Au13C CDC13 /opt/topspin 1207 52

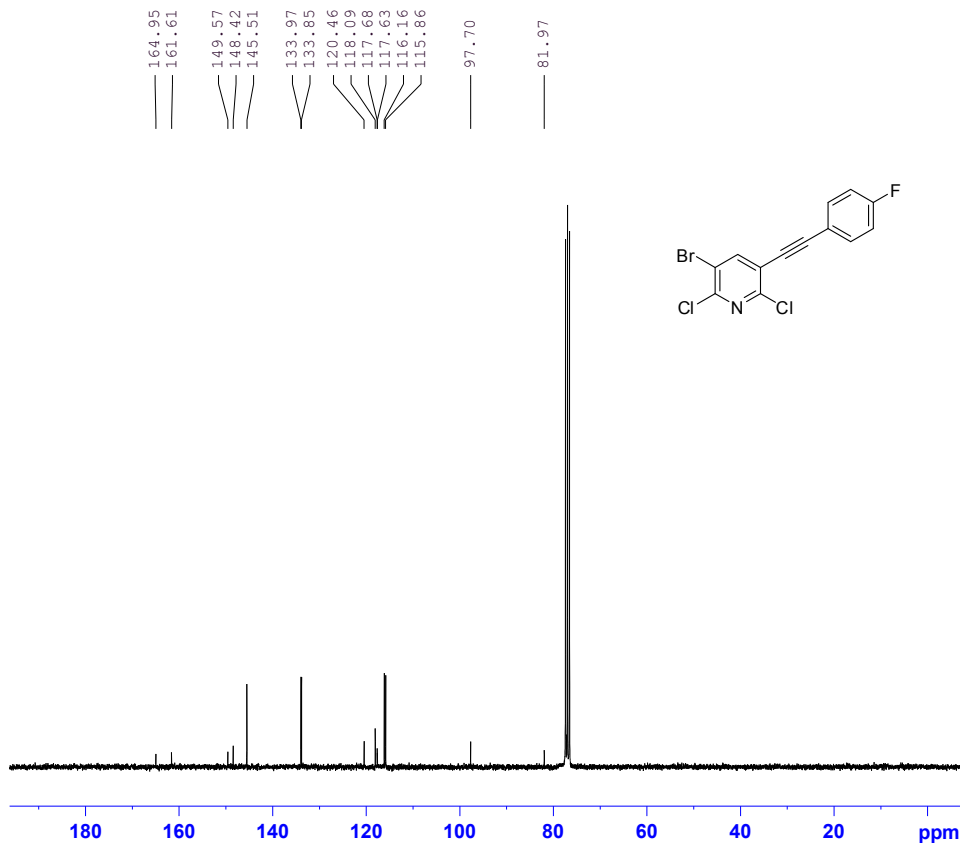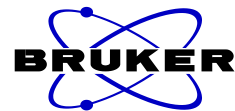

Current Data Parameters  
 NAME SRE 853 3000 13C  
 EXPNO 10  
 PROCNO 1

F2 - Acquisition Parameters  
 Date\_ 20120715  
 Time 1.27  
 INSTRUM AV300  
 PROBHD 5 mm PABBO BB-  
 PULPROG zgpg30  
 TD 32768  
 SOLVENT CDC13  
 NS 3000  
 DS 4  
 SWH 21097.047 Hz  
 FIDRES 0.643831 Hz  
 AQ 0.7766516 sec  
 RG 32768  
 DW 23.700 usec  
 DE 6.00 usec  
 TE 296.1 K  
 D1 2.00000000 sec  
 d11 0.03000000 sec  
 DELTA 1.89999998 sec  
 TDO 1

===== CHANNEL f1 =====  
 NUC1 13C  
 P1 9.60 usec  
 PL1 -1.10 dB  
 SFO1 75.4771825 MHz

===== CHANNEL f2 =====  
 CPDPRG2 waltz16  
 NUC2 1H  
 PCPD2 100.00 usec  
 PL2 0.00 dB  
 PL12 19.00 dB  
 PL13 21.00 dB  
 SFO2 300.1312005 MHz

F2 - Processing parameters  
 SI 32768  
 SF 75.4677537 MHz  
 WDW EM  
 SSB 0  
 LB 1.00 Hz  
 GB 0  
 PC 1.40

Reimann, SRE 854  
 Au1H CDC13 /opt/topspin 1207 12

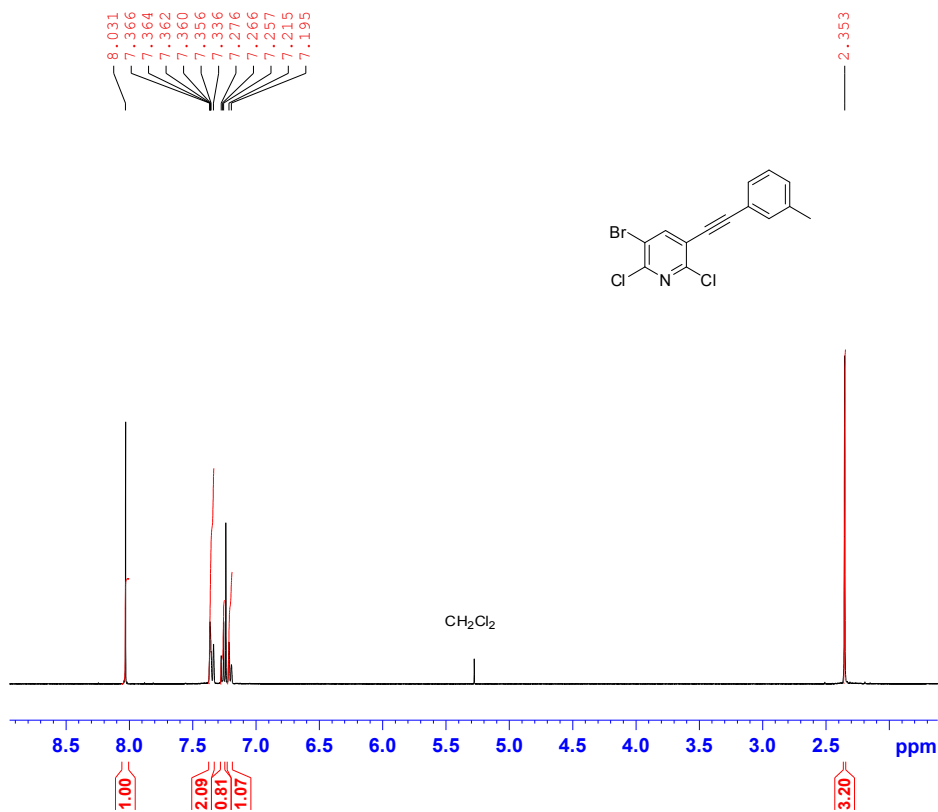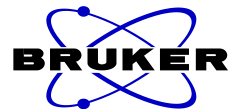

Current Data Parameters  
 NAME SRE 854 1H  
 EXPNO 10  
 PROCNO 1

F2 - Acquisition Parameters  
 Date\_ 20120713  
 Time 22.53  
 INSTRUM AV400  
 PROBHD 5 mm PABBO BB-  
 PULPROG zg30  
 TD 32768  
 SOLVENT CDC13  
 NS 32  
 DS 4  
 SWH 8012.820 Hz  
 FIDRES 0.244532 Hz  
 AQ 2.0447731 sec  
 RG 512  
 DW 62.400 usec  
 DE 6.00 usec  
 TE 297.0 K  
 D1 1.50000000 sec  
 TDO 1

===== CHANNEL f1 =====  
 NUC1 1H  
 P1 11.10 usec  
 PL1 -1.00 dB  
 SFO1 400.1324000 MHz

F2 - Processing parameters  
 SI 32768  
 SF 400.1300297 MHz  
 WDW EM  
 SSB 0  
 LB 0.10 Hz  
 GB 0  
 PC 1.00

Reimann, SRE 854  
Aul3C CDCl3 /opt/topspin 1207 12

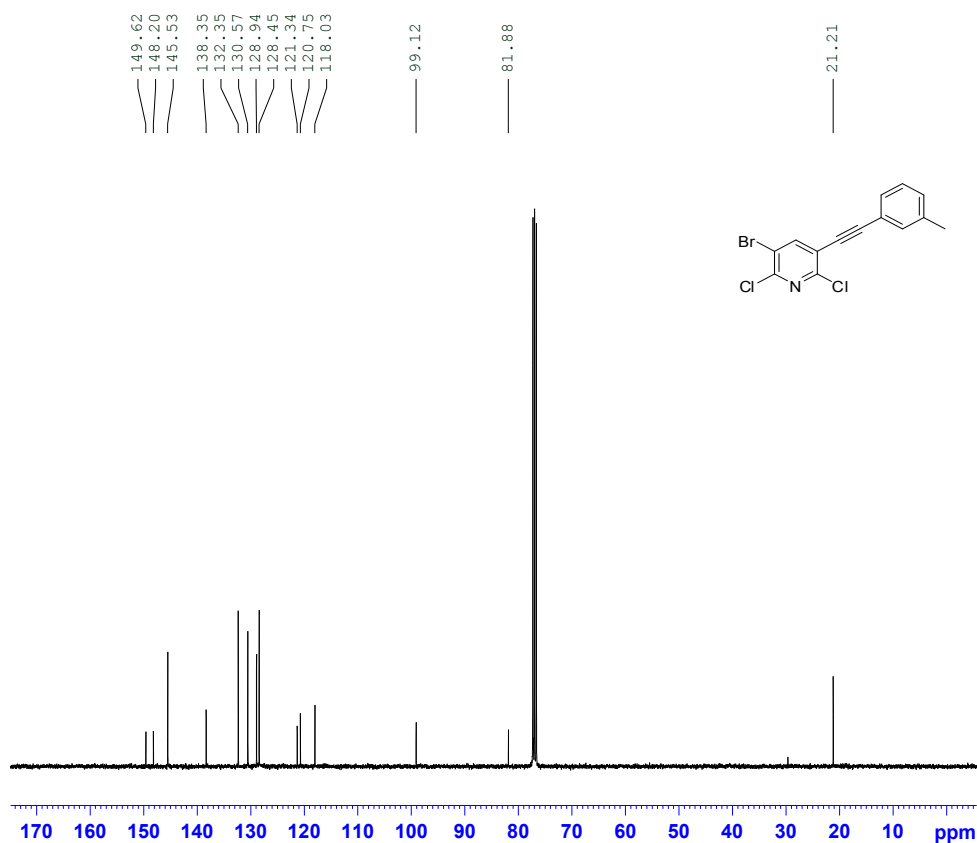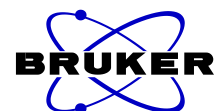

Current Data Parameters  
NAME SRE 854 13C  
EXPNO 11  
PROCNO 1

F2 - Acquisition Parameters  
Date 20120714  
Time 0.29  
INSTRUM AV400  
PROBHD 5 mm PABBO BE-  
PULPROG zgpg30  
TD 65536  
SOLVENT CDCl3  
NS 2000  
DS 4  
SWH 29940.119 Hz  
FIDRES 0.456850 Hz  
AQ 1.0945013 sec  
RG 18390.4  
DW 16.700 usec  
DE 6.00 usec  
TE 297.0 K  
D1 1.70000005 sec  
d11 0.03000000 sec  
DELTA 1.60000002 sec  
TD0 1

===== CHANNEL f1 =====  
NUC1 13C  
P1 10.00 usec  
PL1 -0.50 dB  
SFO1 100.6260690 MHz

===== CHANNEL f2 =====  
CPDPRG2 waltz16  
NUC2 1H  
FCFD2 100.00 usec  
PL2 -2.00 dB  
PL12 17.00 dB  
PL13 19.00 dB  
SFO2 400.1318000 MHz

F2 - Processing parameters  
SI 32768  
SF 100.6127753 MHz  
WDW EM  
SSB 0  
LB 1.00 Hz  
GB 0  
PC 1.00

# <sup>1</sup>H- and <sup>13</sup>C-NMR Spectra of Compounds 8a-g

Reimann/ SRE 884  
AulH CDC13 /opt/topspin 1208 49

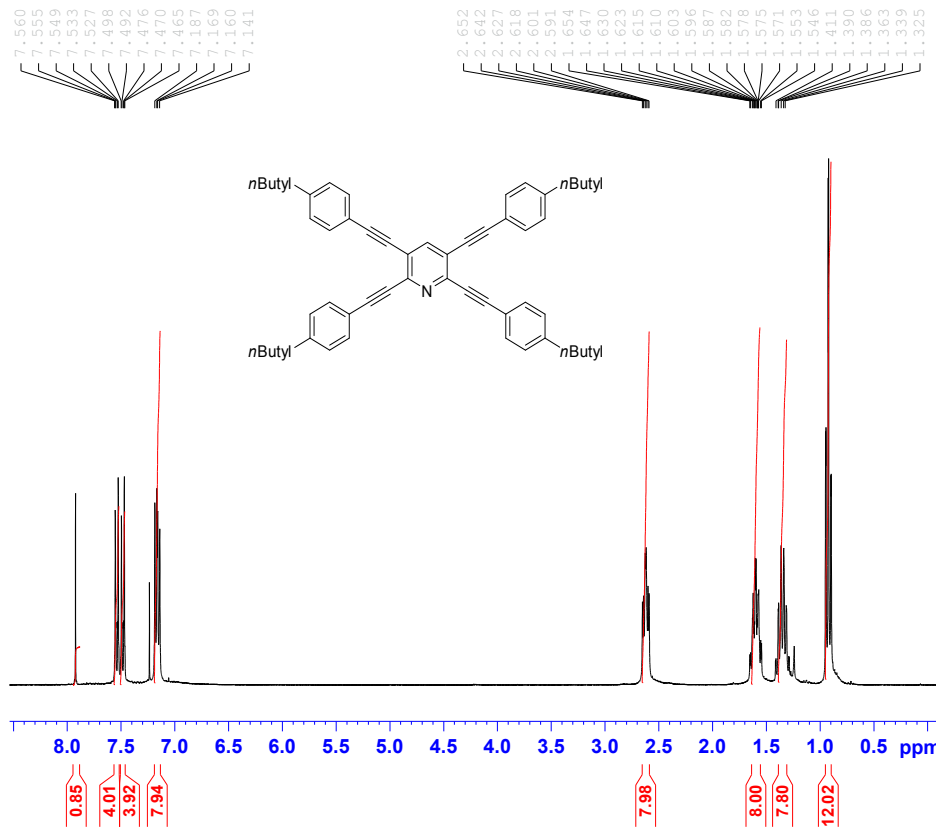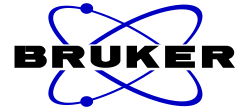

Current Data Parameters  
NAME SRE 884 1H  
EXPNO 10  
PROCNO 1

F2 - Acquisition Parameters  
Date\_ 20120811  
Time 13.28  
INSTRUM AV300  
PROBHD 5 mm PABBO BB-  
PULPROG zg30  
TD 32768  
SOLVENT CDC13  
NS 32  
DS 4  
SWH 6172.839 Hz  
FIDRES 0.188380 Hz  
AQ 2.6542580 sec  
RG 114  
DW 81.000 usec  
DE 6.00 usec  
TE 296.0 K  
D1 1.00000000 sec  
TDO 1

===== CHANNEL f1 =====  
NUC1 1H  
P1 11.00 usec  
PL1 0.00 dB  
SFO1 300.1318534 MHz

F2 - Processing parameters  
SI 32768  
SF 300.1300223 MHz  
WDW EM  
SSB 0  
LB 0.10 Hz  
GB 0  
PC 1.00

Reimann/ SRE 884  
Aul13C CDC13 /opt/topspin 1208 49

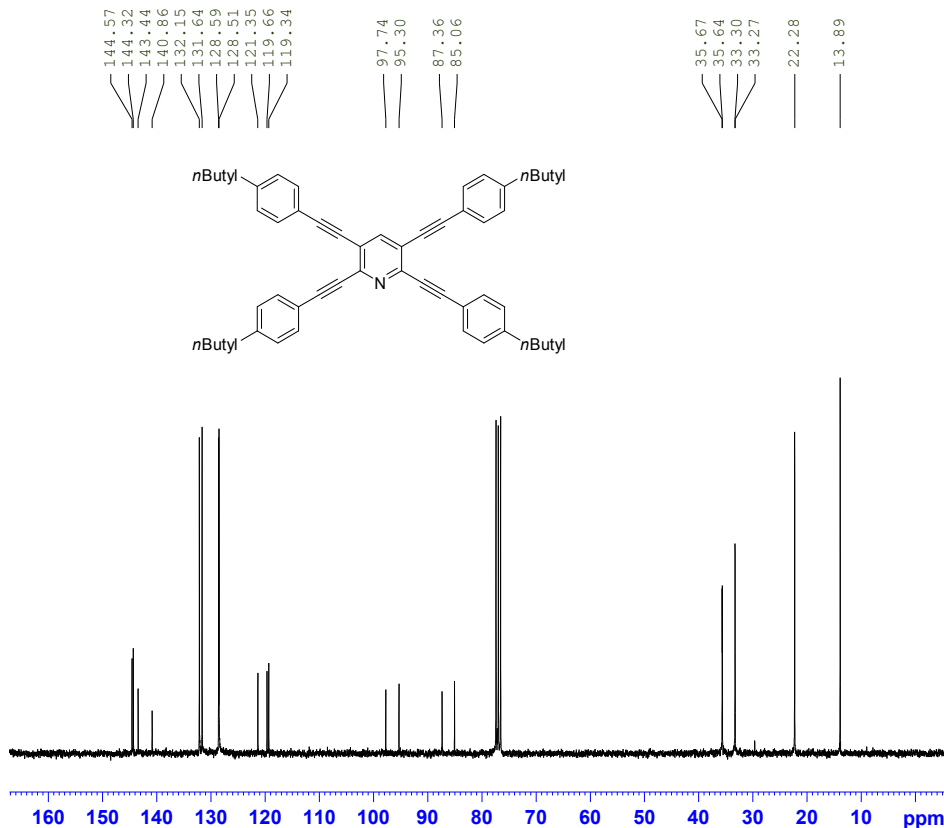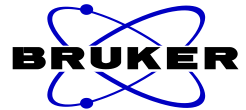

Current Data Parameters  
NAME SRE 884 13C  
EXPNO 11  
PROCNO 1

F2 - Acquisition Parameters  
Date\_ 20120811  
Time 14.16  
INSTRUM AV300  
PROBHD 5 mm PABBO BB-  
PULPROG zgpg30  
TD 32768  
SOLVENT CDC13  
NS 1000  
DS 4  
SWH 21097.047 Hz  
FIDRES 0.643831 Hz  
AQ 0.7766516 sec  
RG 32768  
DW 23.700 usec  
DE 6.00 usec  
TE 296.6 K  
D1 2.00000000 sec  
d11 0.03000000 sec  
DELTA 1.89999998 sec  
TDO 1

===== CHANNEL f1 =====  
NUC1 13C  
P1 9.60 usec  
PL1 -1.10 dB  
SFO1 75.4771825 MHz

===== CHANNEL f2 =====  
CPDPRG2 waltz16  
NUC2 1H  
PCPD2 100.00 usec  
PL2 0.00 dB  
PL12 19.00 dB  
PL13 21.00 dB  
SFO2 300.1312005 MHz

F2 - Processing parameters  
SI 32768  
SF 75.4677567 MHz  
WDW EM  
SSB 0  
LB 1.00 Hz  
GB 0  
PC 1.40

Reimann, SRE 857  
AulH CDCl3 /opt/topspin 1207 8

7.967  
7.652  
7.638  
7.632  
7.601  
7.595  
7.579  
7.575  
7.565  
7.559  
7.555  
7.549  
7.407  
7.400  
7.396  
7.392  
7.389  
7.382  
7.378  
7.376  
7.352  
7.346  
7.343  
7.339  
7.335  
7.328  
7.324  
7.321  
7.317  
7.300

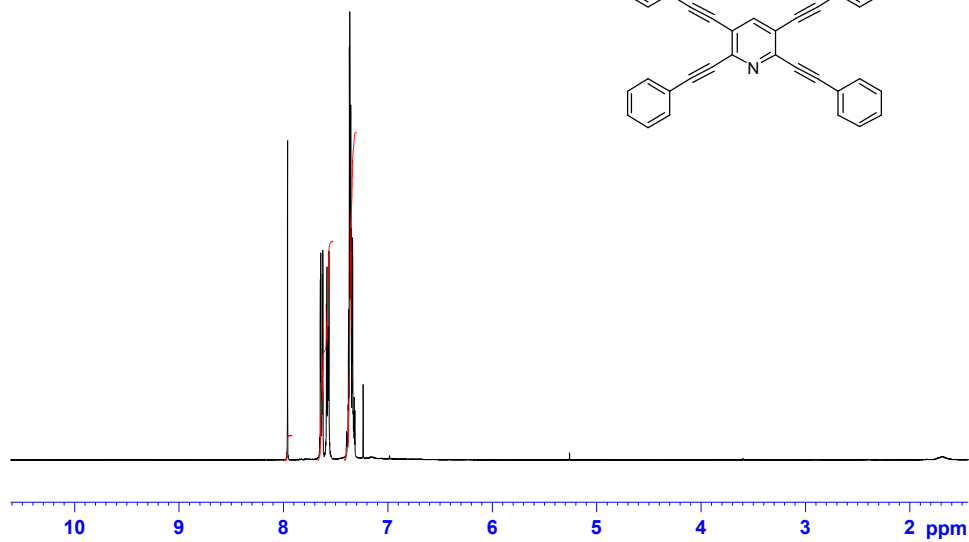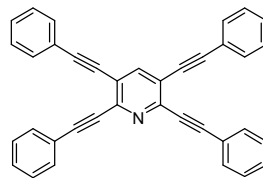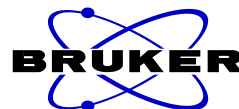

Current Data Parameters  
NAME SRE 857 1H  
EXPNO 10  
PROCNO 1

F2 - Acquisition Parameters  
Date\_ 20120712  
Time 19.50  
INSTRUM AV400  
PROBHD 5 mm PABBO BB-  
PULPROG zg30  
TD 32768  
SOLVENT CDCl3  
NS 32  
DS 4  
SWH 8012.820 Hz  
FIDRES 0.244532 Hz  
AQ 2.0447731 sec  
RG 114  
DW 62.400 usec  
DE 6.00 usec  
TE 297.0 K  
D1 1.50000000 sec  
TDO 1

===== CHANNEL f1 =====  
NUC1 1H  
P1 11.10 usec  
PL1 -1.00 dB  
SFO1 400.1324000 MHz

F2 - Processing parameters  
SI 32768  
SF 400.1300302 MHz  
WDW EM  
SSB 0  
LB 0.10 Hz  
GB 0  
PC 1.00



Reimann, SRE 857  
Aul3C CDC13 /opt/topspin 1207 8

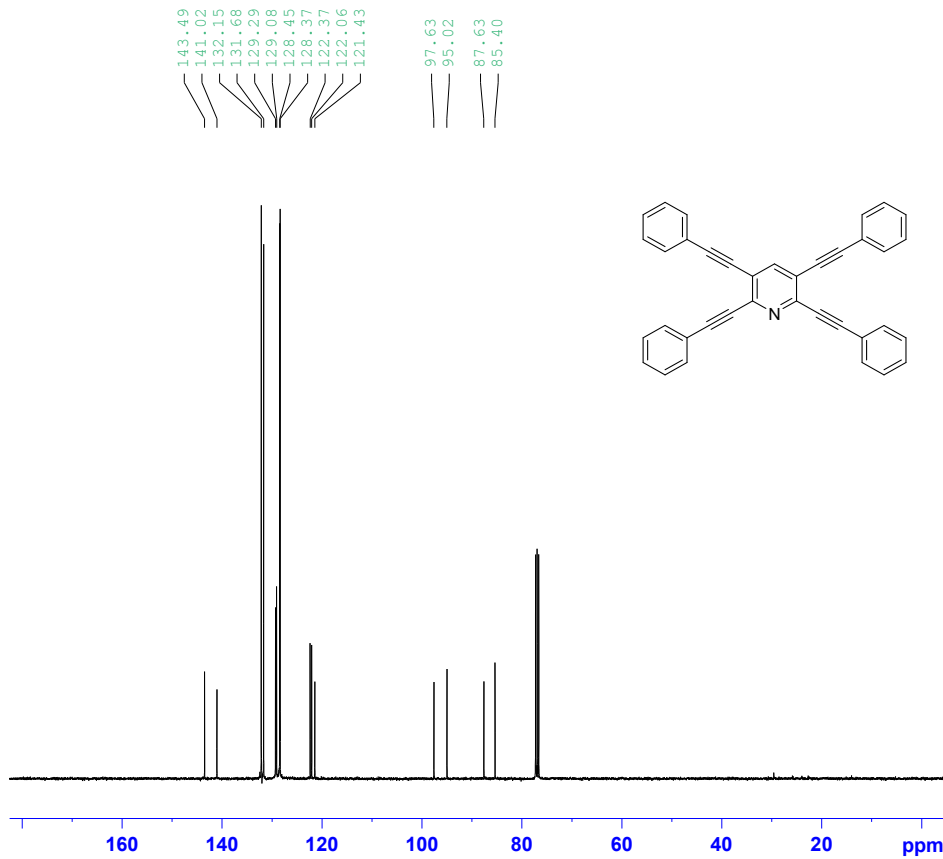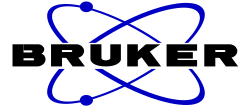

Current Data Parameters  
NAME SRE 857 13C  
EXPNO 11  
PROCNO 1

F2 - Acquisition Parameters  
Date\_ 20120712  
Time\_ 19.47  
INSTRUM AV400  
PROBHD 5 mm PABBO BB-  
PULPROG zgpg30  
TD 65536  
SOLVENT CDC13  
NS 1000  
DS 4  
SWH 29940.119 Hz  
FIDRES 0.456850 Hz  
AQ 1.0945013 sec  
RG 32768  
DW 16.700 usec  
DE 6.00 usec  
TE 297.0 K  
D1 1.70000005 sec  
d11 0.03000000 sec  
DELTA 1.60000002 sec  
TDO 1

==== CHANNEL f1 =====  
NUC1 13C  
P1 10.00 usec  
PL1 -0.50 dB  
SFO1 100.6260690 MHz

==== CHANNEL f2 =====  
CPDPRG2 waltz16  
NUC2 1H  
PCPD2 100.00 usec  
PL2 -2.00 dB  
PL12 17.00 dB  
PL13 19.00 dB  
SFO2 400.1318000 MHz

F2 - Processing parameters  
SI 32768  
SF 100.6127850 MHz  
WDW EM  
SSB 0  
LB 1.00 Hz  
GB 0  
PC 1.00

Reimann, SRE 858  
AulH CDC13 /opt/topspin 1207 9

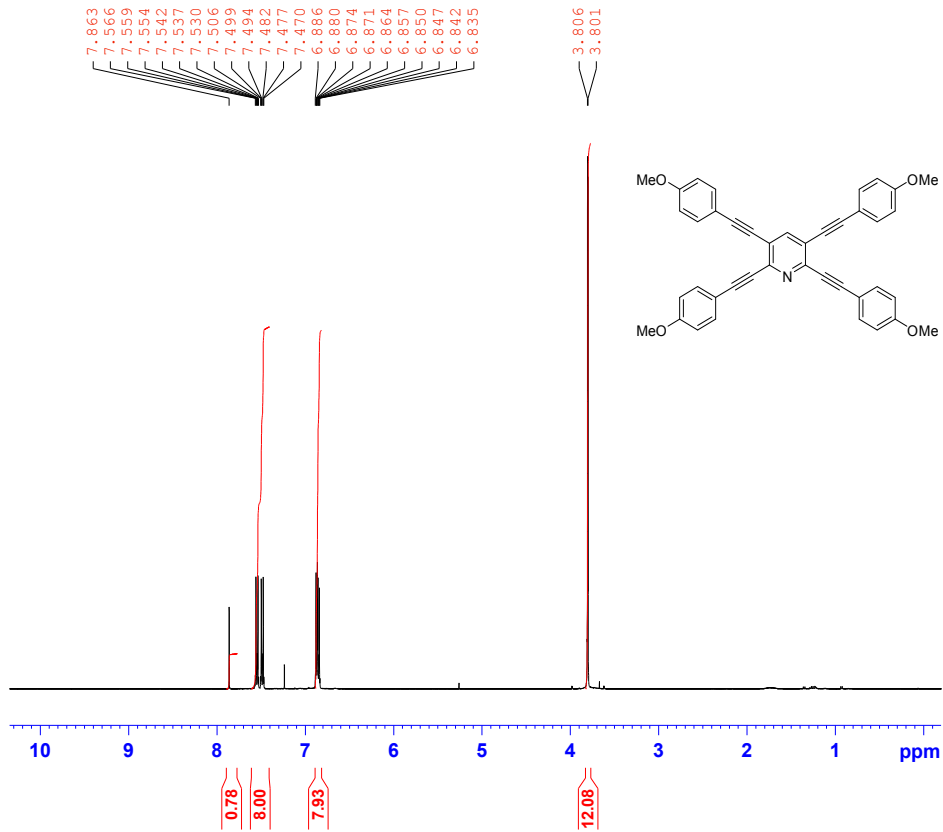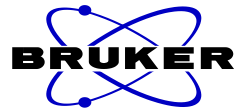

Current Data Parameters  
NAME SRE 858 1H  
EXPNO 10  
PROCNO 1

F2 - Acquisition Parameters  
Date\_ 20120712  
Time\_ 22.01  
INSTRUM AV400  
PROBHD 5 mm PABBO BB-  
PULPROG zg30  
TD 32768  
SOLVENT CDC13  
NS 32  
DS 4  
SWH 8012.820 Hz  
FIDRES 0.244532 Hz  
AQ 2.0447731 sec  
RG 128  
DW 62.400 usec  
DE 6.00 usec  
TE 297.0 K  
D1 1.50000000 sec  
TDO 1

==== CHANNEL f1 =====  
NUC1 1H  
P1 11.10 usec  
PL1 -1.00 dB  
SFO1 400.1324000 MHz

F2 - Processing parameters  
SI 32768  
SF 400.1300304 MHz  
WDW EM  
SSB 0  
LB 0.10 Hz  
GB 0  
PC 1.00

Reimann, SRE 858  
 Au13C CDC13 /opt/topspin 1207 9

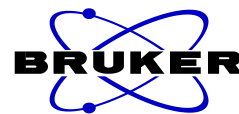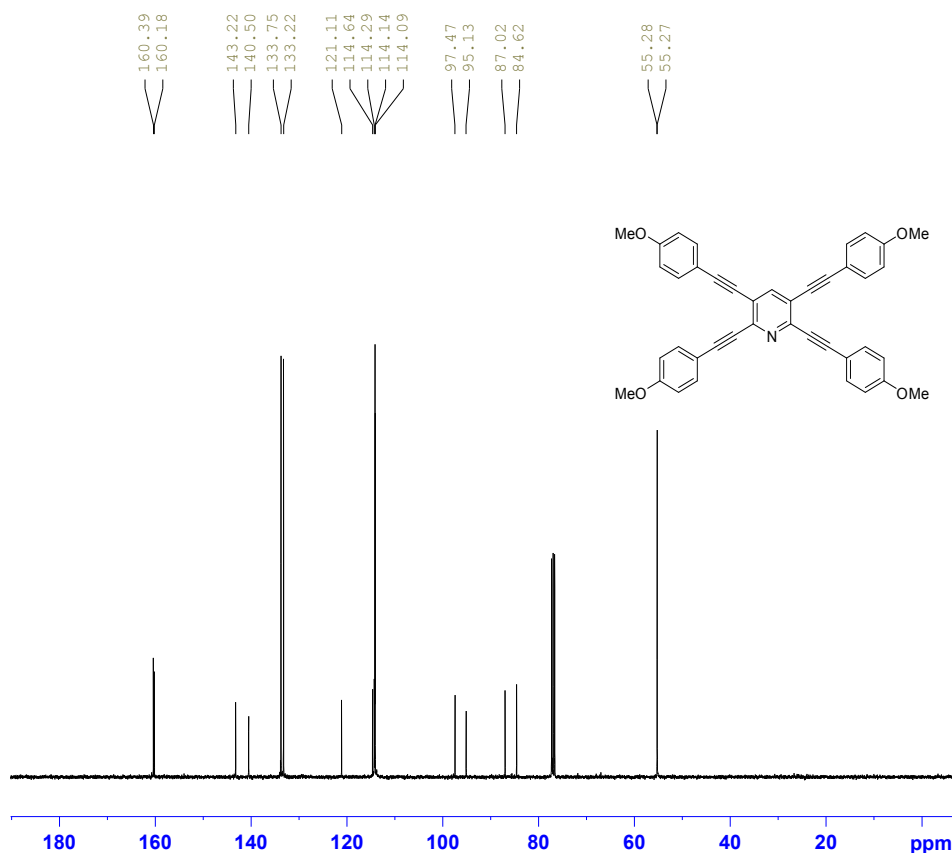

Current Data Parameters  
 NAME SRE 858 13 C  
 EXPNO 11  
 PROCNO 1

F2 - Acquisition Parameters  
 Date\_ 20120712  
 Time 21.58  
 INSTRUM AV400  
 PROBHD 5 mm PABBO BB-  
 PULPROG zgpg30  
 TD 65536  
 SOLVENT CDCl3  
 NS 1000  
 DS 4  
 SWH 29940.119 Hz  
 FIDRES 0.456850 Hz  
 AQ 1.0945013 sec  
 RG 32768  
 DW 16.700 usec  
 DE 6.00 usec  
 TE 297.0 K  
 D1 1.70000005 sec  
 d11 0.03000000 sec  
 DELTA 1.60000002 sec  
 TDO 1

===== CHANNEL f1 =====  
 NUC1 13C  
 P1 10.00 usec  
 PL1 -0.50 dB  
 SFO1 100.6260690 MHz

===== CHANNEL f2 =====  
 CPDPRG2 waltz16  
 NUC2 1H  
 PCPD2 100.00 usec  
 PL2 -2.00 dB  
 PL12 17.00 dB  
 PL13 19.00 dB  
 SFO2 400.1318000 MHz

F2 - Processing parameters  
 SI 32768  
 SF 100.6127798 MHz  
 WDW EM  
 SSB 0  
 LB 1.00 Hz  
 GB 0  
 PC 1.00

Reimann, SRE 862  
Aul1H CDC13 /opt/topspin 1207 11

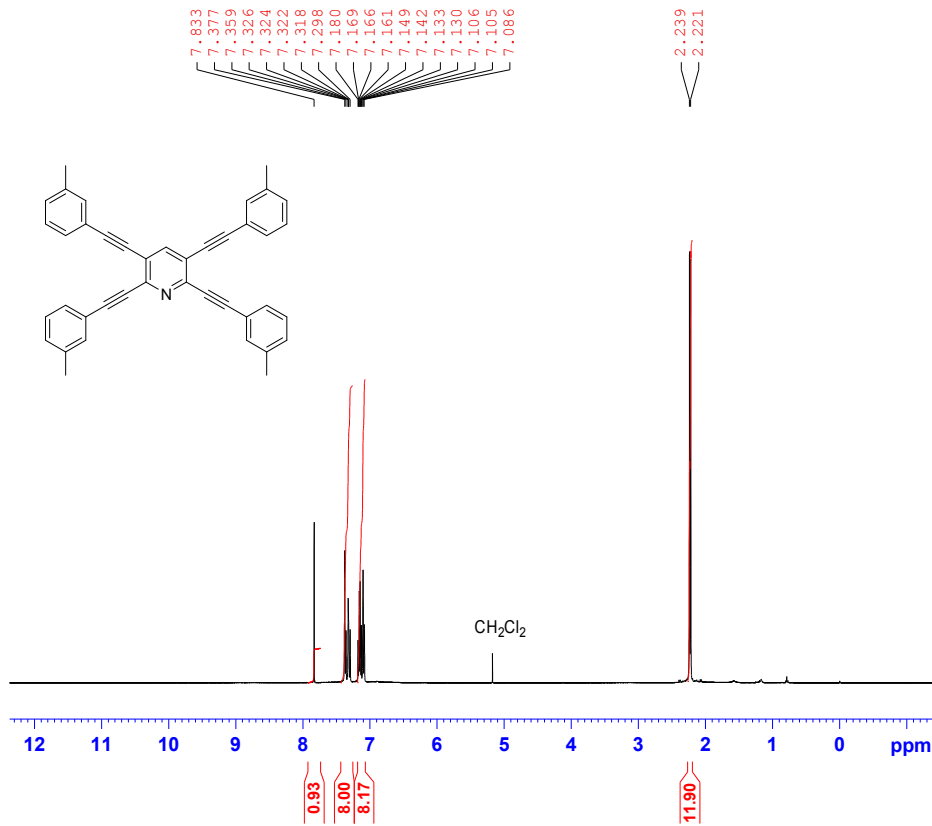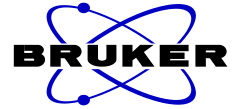

Current Data Parameters  
NAME SRE 862 1H  
EXPNO 10  
PROCNO 1

F2 - Acquisition Parameters  
Date\_ 20120712  
Time 22.43  
INSTRUM AV400  
PROBHD 5 mm PABBO BB-  
PULPROG zg30  
TD 32768  
SOLVENT CDC13  
NS 32  
DS 4  
SWH 8012.820 Hz  
FIDRES 0.244532 Hz  
AQ 2.0447731 sec  
RG 101.6  
DW 62.400 usec  
DE 6.00 usec  
TE 297.0 K  
D1 1.5000000 sec  
TDO 1

==== CHANNEL f1 =====  
NUC1 1H  
P1 11.10 usec  
PL1 -1.00 dB  
SFO1 400.1324000 MHz

F2 - Processing parameters  
SI 32768  
SF 400.1300661 MHz  
WDW EM  
SSB 0  
LB 0.10 Hz  
GB 0  
PC 1.00

Reimann, SRE 862  
Aul13C CDC13 /opt/topspin 1207 11

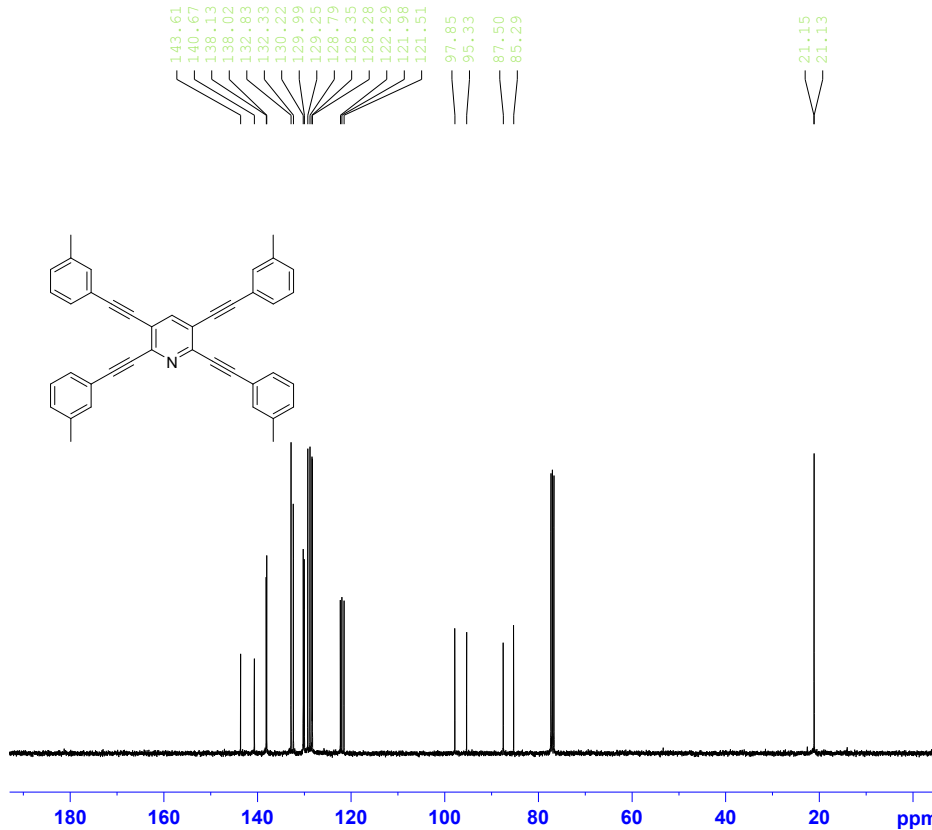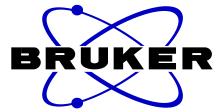

Current Data Parameters  
NAME SRE 862 13C  
EXPNO 11  
PROCNO 1

F2 - Acquisition Parameters  
Date\_ 20120712  
Time 22.40  
INSTRUM AV400  
PROBHD 5 mm PABBO BB-  
PULPROG zgpg30  
TD 65536  
SOLVENT CDC13  
NS 500  
DS 4  
SWH 29940.119 Hz  
FIDRES 0.456850 Hz  
AQ 1.0945013 sec  
RG 32768  
DW 16.700 usec  
DE 6.00 usec  
TE 297.0 K  
D1 1.7000000 sec  
d11 0.0300000 sec  
DELTA 1.6000000 sec  
TDO 1

==== CHANNEL f1 =====  
NUC1 13C  
P1 10.00 usec  
PL1 -0.50 dB  
SFO1 100.6260690 MHz

==== CHANNEL f2 =====  
CPDPRG2 waltz16  
NUC2 1H  
PCPD2 100.00 usec  
PL2 -2.00 dB  
PL12 17.00 dB  
PL13 19.00 dB  
SFO2 400.1318000 MHz

F2 - Processing parameters  
SI 32768  
SF 100.6127817 MHz  
WDW EM  
SSB 0  
LB 1.00 Hz  
GB 0  
PC 1.00

Reimann, SRE 859  
AulH CDCl3 /opt/topspin 1207 23

8.043  
7.705  
7.678  
7.636  
7.605

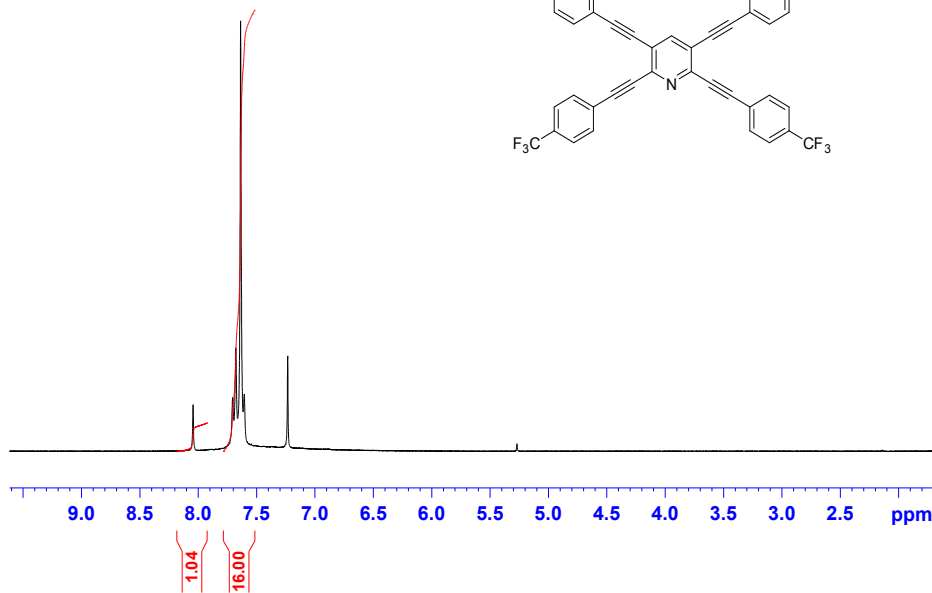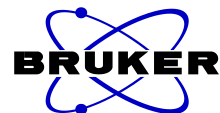

Current Data Parameters  
NAME SRE 859 1H  
EXPNO 10  
PROCNO 1

F2 - Acquisition Parameters  
Date\_ 20120713  
Time 4.44  
INSTRUM AV300  
PROBHD 5 mm PABBO BB-  
PULPROG zg30  
TD 32768  
SOLVENT CDCl3  
NS 32  
DS 4  
SWH 6172.839 Hz  
FIDRES 0.188380 Hz  
AQ 2.6542580 sec  
RG 322.5  
DW 81.000 usec  
DE 6.00 usec  
TE 295.9 K  
D1 1.0000000 sec  
TD0 1

==== CHANNEL f1 =====  
NUC1 1H  
P1 11.00 usec  
PL1 0.00 dB  
SF01 300.1318534 MHz

F2 - Processing parameters  
SI 32768  
SF 300.1300235 MHz  
WDW EM  
SSB 0  
LB 0.10 Hz  
GB 0  
PC 1.00

Reimann / SRE 859  
 Aul3C CDCl3 /opt/topspin 1207 53

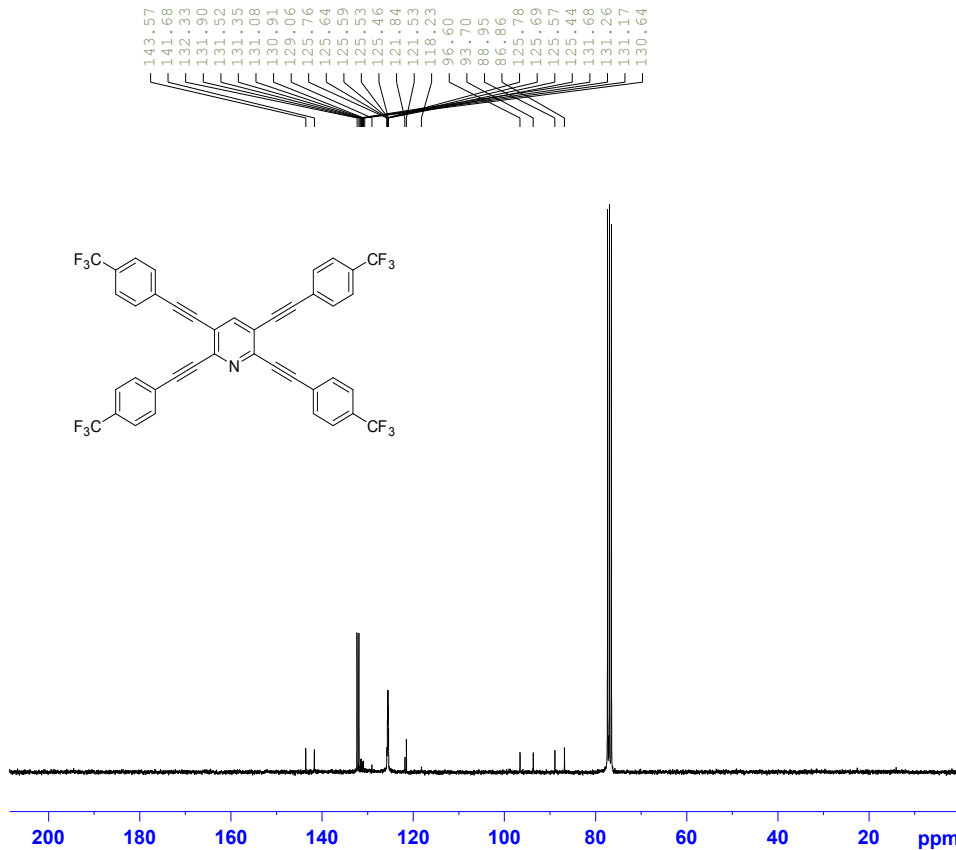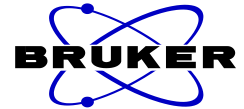

Current Data Parameters  
 NAME SRE 859 13C 8000  
 EXPNO 10  
 PROCNO 1

F2 - Acquisition Parameters  
 Date\_ 20120715  
 Time 8.02  
 INSTRUM AV300  
 PROBHD 5 mm PABBO BB-  
 PULPROG zgpg30  
 TD 32768  
 SOLVENT CDCl3  
 NS 8000  
 DS 4  
 SWH 21097.047 Hz  
 FIDRES 0.643831 Hz  
 AQ 0.7766516 sec  
 RG 32768  
 DW 23.700 usec  
 DE 6.00 usec  
 TE 295.9 K  
 D1 2.0000000 sec  
 d11 0.0300000 sec  
 DELTA 1.89999998 sec  
 TD0 1

===== CHANNEL f1 =====  
 NUC1 13C  
 P1 9.60 dB  
 PL1 -1.10 dB  
 SFO1 75.4771825 MHz

===== CHANNEL f2 =====  
 CPDPRG2 waltz16  
 NUC2 1H  
 PCPD2 100.00 usec  
 PL2 0.00 dB  
 PL12 19.00 dB  
 PL13 21.00 dB  
 SFO2 300.1312005 MHz

F2 - Processing parameters  
 SI 32768  
 SF 75.4677545 MHz  
 WDW EM  
 SSB 0  
 LB 1.00 Hz  
 GB 0  
 PC 1.40

Reimann, SRE 873  
 AulH CDCl3 /opt/topspin 1208 13

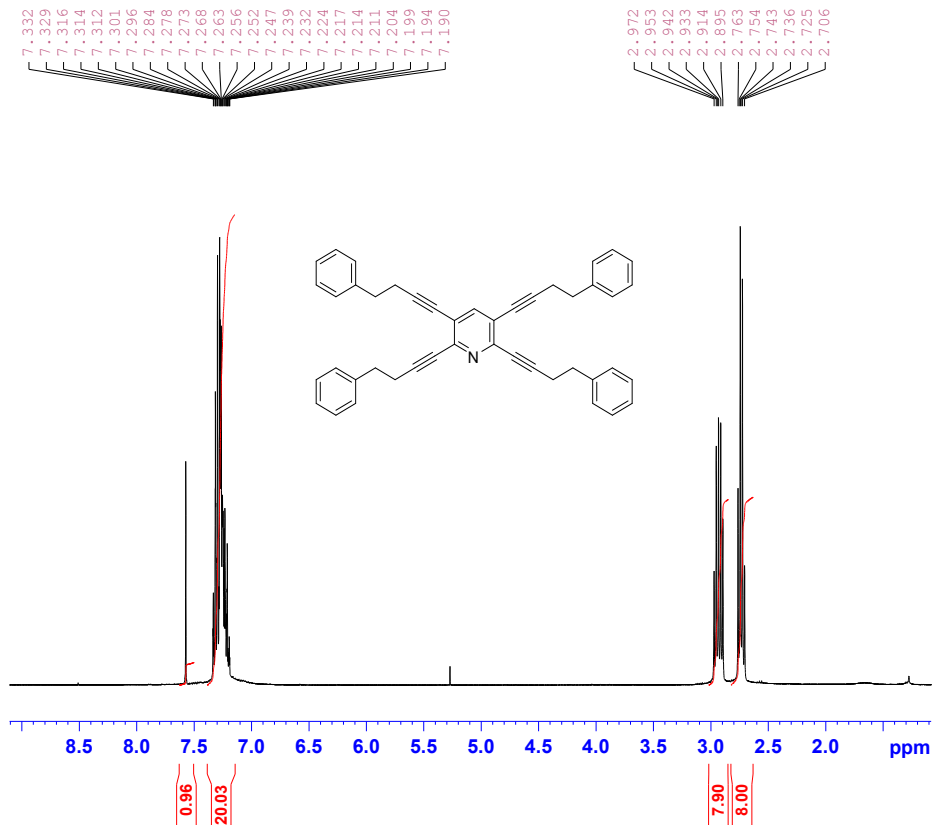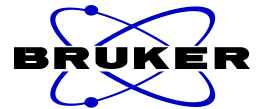

Current Data Parameters  
 NAME SRE 873 1H  
 EXPNO 10  
 PROCNO 1

F2 - Acquisition Parameters  
 Date\_ 20120802  
 Time 13.02  
 INSTRUM AV400  
 PROBHD 5 mm PABBO BB-  
 PULPROG zg30  
 TD 32768  
 SOLVENT CDCl3  
 NS 32  
 DS 4  
 SWH 8012.820 Hz  
 FIDRES 0.244532 Hz  
 AQ 2.0447731 sec  
 RG 90.5  
 DW 62.400 usec  
 DE 6.00 usec  
 TE 297.0 K  
 D1 1.5000000 sec  
 TD0 1

===== CHANNEL f1 =====  
 NUC1 1H  
 P1 11.10 usec  
 PL1 -1.00 dB  
 SFO1 400.1324000 MHz

F2 - Processing parameters  
 SI 32768  
 SF 400.1300299 MHz  
 WDW EM  
 SSB 0  
 LB 0.10 Hz  
 GB 0  
 PC 1.00

Reimann, SRE 873  
Aul13C CDCl3 /opt/topspin 1208 13

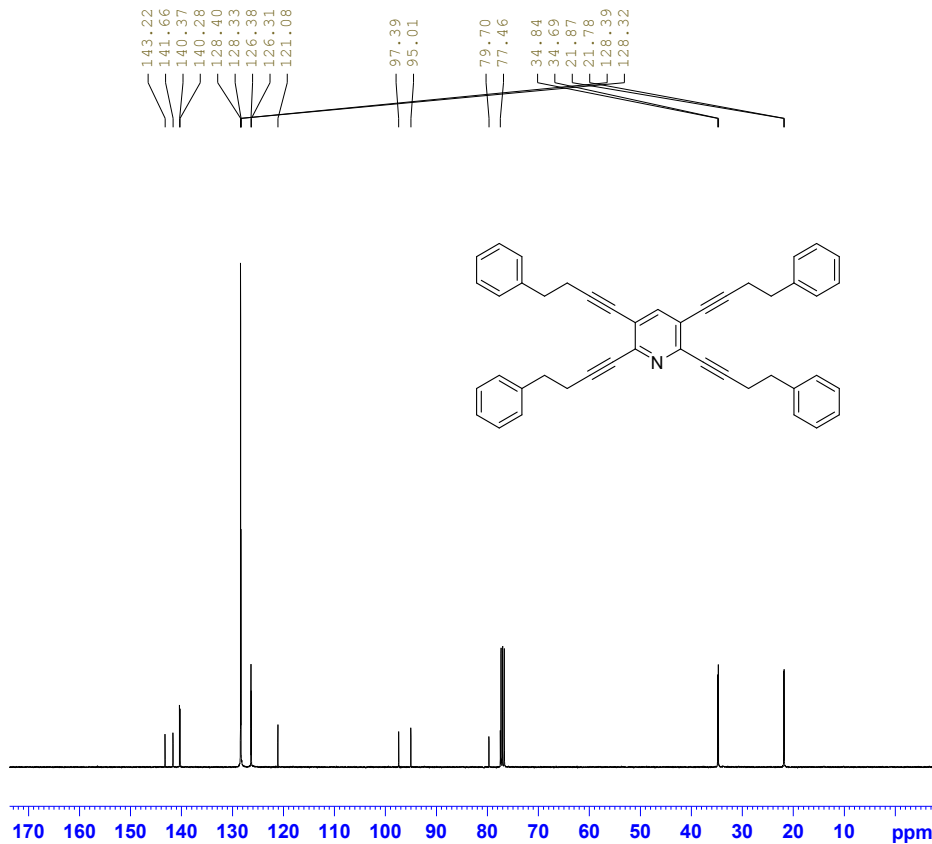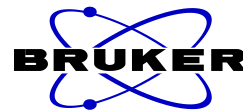

Current Data Parameters  
NAME SRE 873 13 C  
EXPNO 11  
PROCNO 1

F2 - Acquisition Parameters  
Date\_ 20120802  
Time 13.51  
INSTRUM AV400  
PROBHD 5 mm PABBO BB-  
PULPROG zgpg30  
TD 65536  
SOLVENT cdcl3  
NS 1000  
DS 4  
SWH 29940.119 Hz  
FIDRES 0.456850 Hz  
AQ 1.0945013 sec  
RG 32768  
DW 16.700 usec  
DE 6.00 usec  
TE 297.0 K  
D1 1.7000005 sec  
d11 0.0300000 sec  
DELTA 1.6000002 sec  
TD0 1

===== CHANNEL f1 =====  
NUC1 13C  
P1 10.00 usec  
PL1 -0.50 dB  
SFO1 100.6260690 MHz

===== CHANNEL f2 =====  
CPDPRG2 waltz16  
NUC2 1H  
PCPD2 100.00 usec  
PL2 -2.00 dB  
PL12 17.00 dB  
PL13 19.00 dB  
SFO2 400.1318000 MHz

F2 - Processing parameters  
SI 32768  
SF 100.6127827 MHz  
WDW EM  
SSB 0  
LB 1.00 Hz  
GB 0  
PC 1.00

Reimann, SRE 872  
AulH CDCl3 /opt/topspin 1208 17

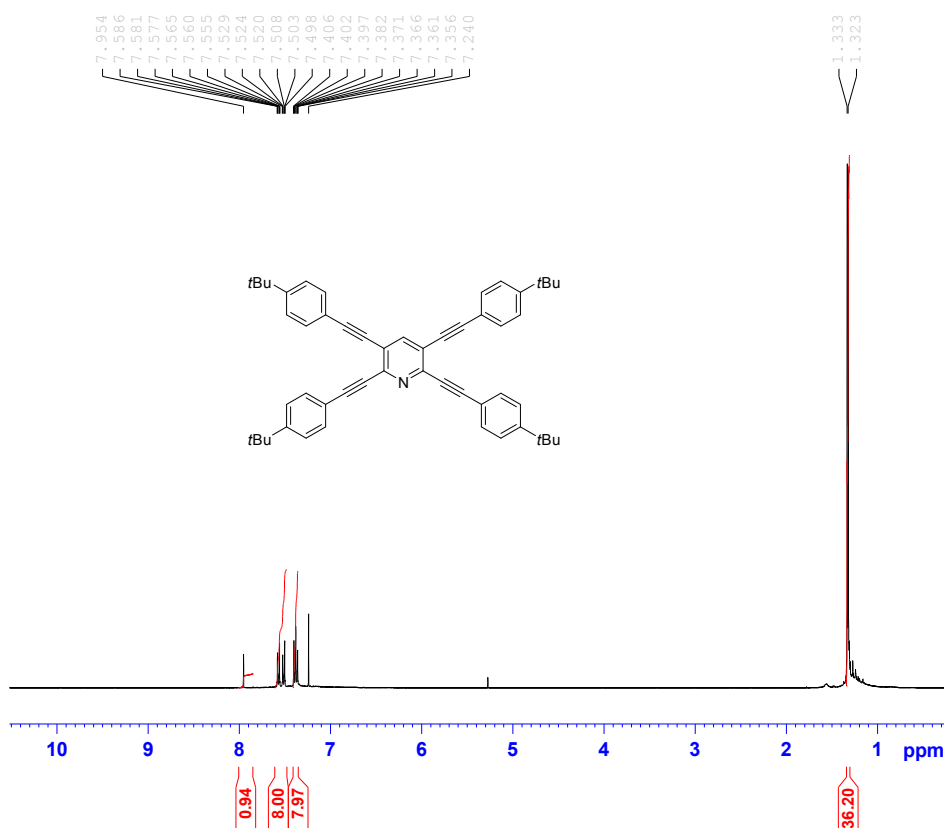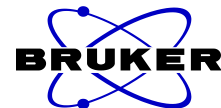

Current Data Parameters  
NAME SRE 872 1H  
EXPNO 10  
PROCNO 1

F2 - Acquisition Parameters  
Date\_ 20120802  
Time 19.48  
INSTRUM AV400  
PROBHD 5 mm PABBO BB-  
PULPROG zg30  
TD 32768  
SOLVENT CDCl3  
NS 32  
DS 4  
SWH 8012.820 Hz  
FIDRES 0.244532 Hz  
AQ 2.0447731 sec  
RG 181  
DW 62.400 usec  
DE 6.00 usec  
TE 297.0 K  
D1 1.5000000 sec  
TD0 1

===== CHANNEL f1 =====  
NUC1 1H  
P1 11.10 usec  
PL1 -1.00 dB  
SFO1 400.1324000 MHz

F2 - Processing parameters  
SI 32768  
SF 400.1300293 MHz  
WDW EM  
SSB 0  
LB 0.10 Hz  
GB 0  
PC 1.00

Reimann, SRE 872  
 Au13C CDC13 /opt/topspin 1208 17

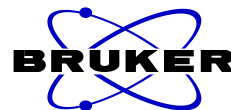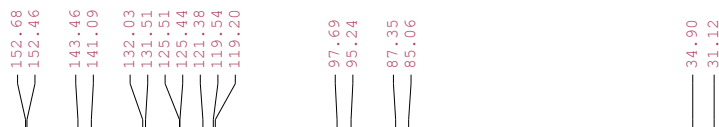

Current Data Parameters  
 NAME SRE 872 13C  
 EXPNO 11  
 PROCNO 1

F2 - Acquisition Parameters  
 Date\_ 20120802  
 Time 20.38  
 INSTRUM AV400  
 PROBHD 5 mm PABBO BB-  
 PULPROG zgpg30  
 TD 65536  
 SOLVENT CDC13  
 NS 1000  
 DS 4  
 SWH 29940.119 Hz  
 FIDRES 0.456850 Hz  
 AQ 1.0945013 sec  
 RG 32768  
 DW 16.700 usec  
 DE 6.00 usec  
 TE 297.0 K  
 D1 1.70000005 sec  
 d11 0.03000000 sec  
 DELTA 1.60000002 sec  
 TDO 1

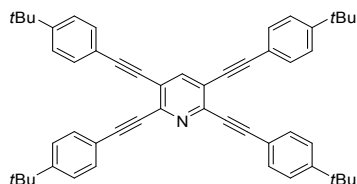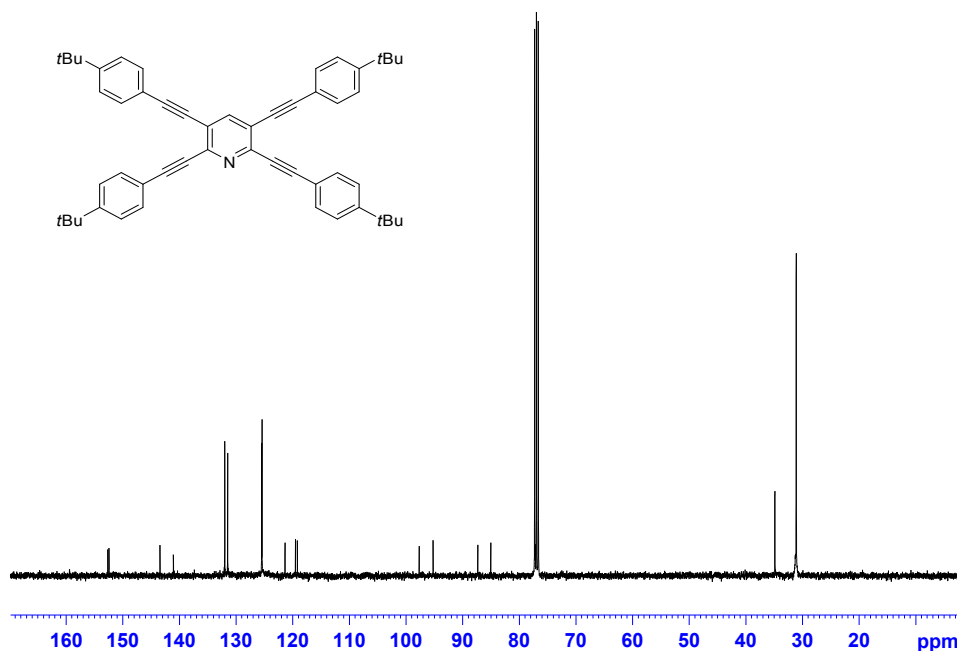

===== CHANNEL f1 =====  
 NUC1 13C  
 P1 10.00 usec  
 PL1 -0.50 dB  
 SFO1 100.6260690 MHz

===== CHANNEL f2 =====  
 CPDPRG2 waltz16  
 NUC2 1H  
 PCPD2 100.00 usec  
 PL2 -2.00 dB  
 PL12 17.00 dB  
 PL13 19.00 dB  
 SFO2 400.1318000 MHz

F2 - Processing parameters  
 SI 32768  
 SF 100.6127766 MHz  
 WDW EM  
 SSB 0  
 LB 1.00 Hz  
 GB 0  
 PC 1.00

| Parameter                 | Value               |
|---------------------------|---------------------|
| 1 Solvent                 | CDC13               |
| 2 Temperature             | 298.2               |
| 3 Pulse Sequence          | zg30                |
| 4 Number of Scans         | 16                  |
| 5 Receiver Gain           | 51                  |
| 6 Relaxation Delay        | 1.0000              |
| 7 Pulse Width             | 10.0000             |
| 8 Acquisition Time        | 5.2954              |
| 9 Acquisition Date        | 2016-12-21T09:14:00 |
| 10 Modification Date      | 2016-12-21T09:14:28 |
| 11 Spectrometer Frequency | 300.13              |
| 12 Spectral Width         | 6188.1              |
| 13 Lowest Frequency       | -1246.8             |
| 14 Nucleus                | 1H                  |
| 15 Acquired Size          | 32768               |
| 16 Spectral Size          | 32768               |

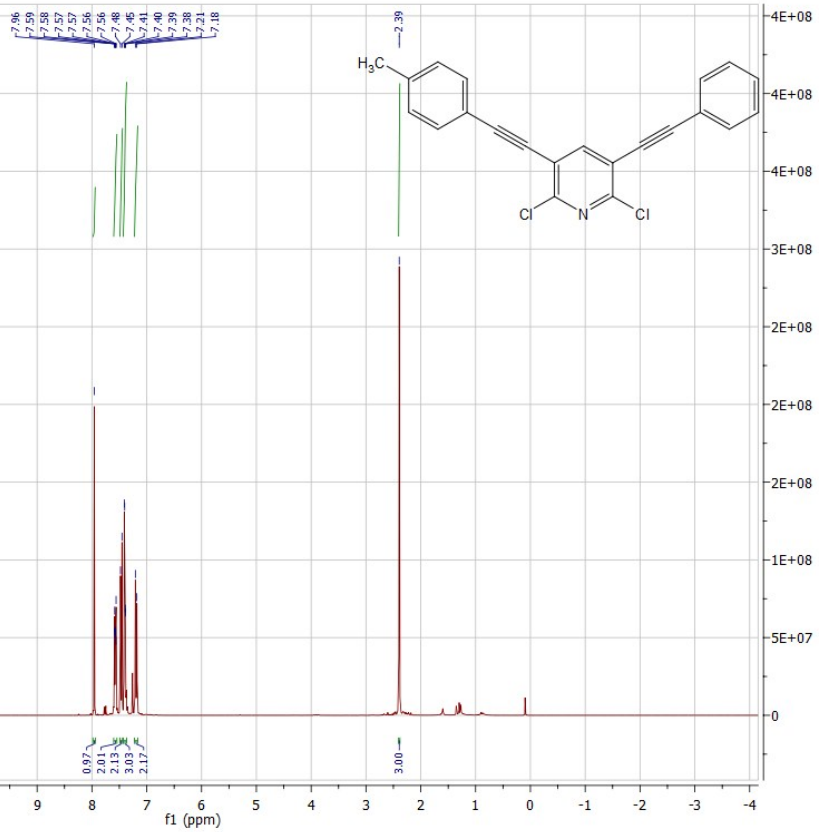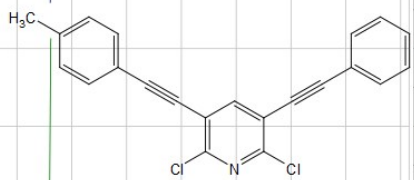

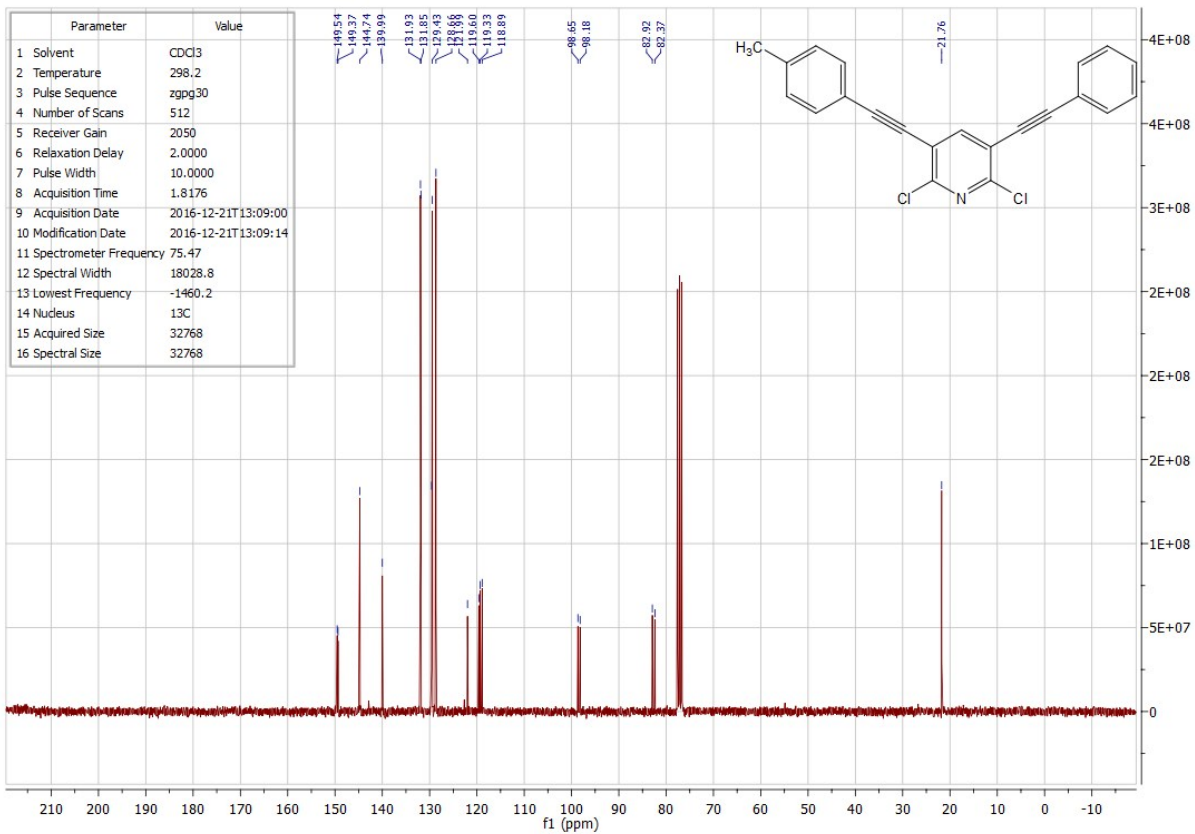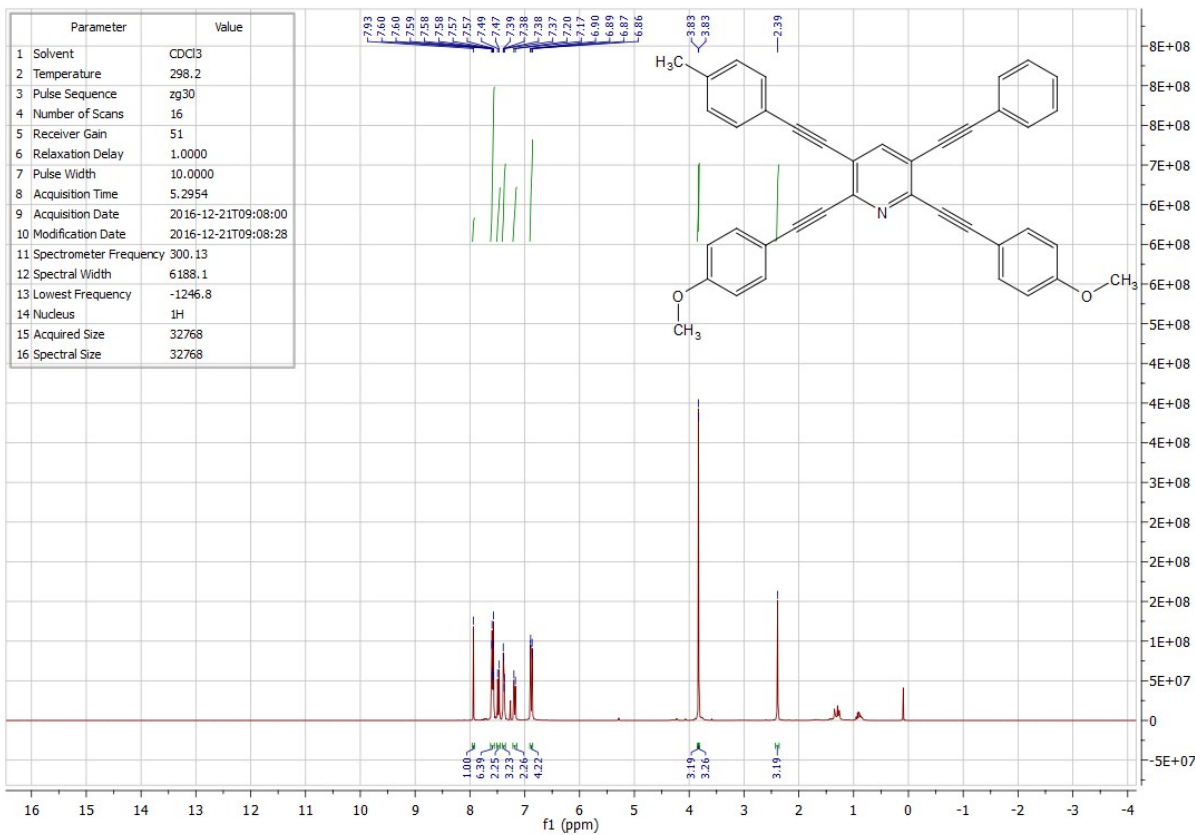



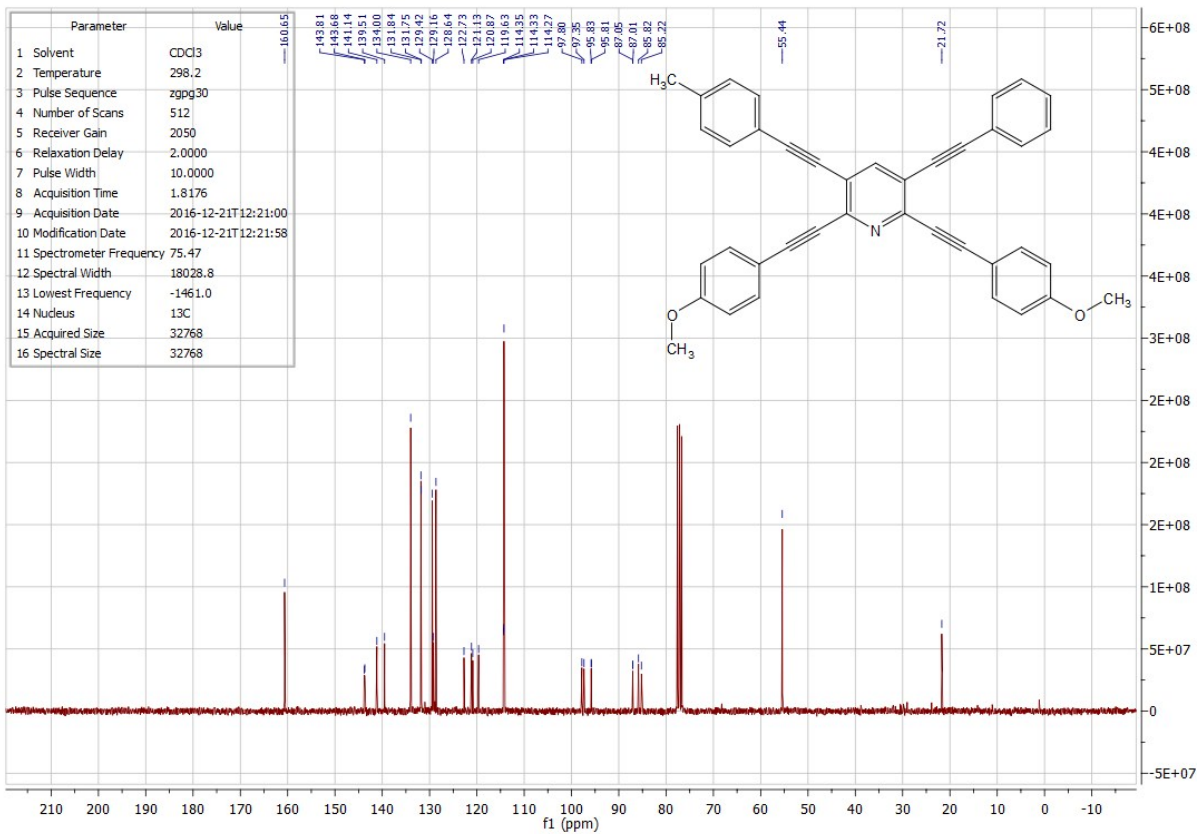

Supplement: c6ob02264b1.pdf [file c6ob02264b1.pdf]
